# Supplementary material for: Highly efficient synthesis of unsymmetrical 1,3-diynes from organoalane reagents and alkynyl bromides mediated by a nickel catalyst
Source: Royal Society of Chemistry journal article supplement (doi:10.1039/c7ra02758c), 2017-01-01

## Supplementary Material

### **Highly efficient synthesis of unsymmetrical 1,3-diynes from organoalanes reagents and alkynylbromides mediated by nickel catalyst**

Song Mo, Xue-Bei Shao, Gang Zhang, Qing-Han Li\*

*College of Chemistry and Environmental Protection Engineering, Southwest University for Nationalities, Chengdu 610041, P. R. China*

e-mail: [lqhchem@163.com](mailto:lqhchem@163.com), [lqhchem@swun.cn](mailto:lqhchem@swun.cn)

## Table of Contents

|             |                                                                                                                                                                       |     |
|-------------|-----------------------------------------------------------------------------------------------------------------------------------------------------------------------|-----|
| <b>I.</b>   | <b>Reagents and General Techniques</b>                                                                                                                                | S5  |
| <b>II.</b>  | <b>The preparation of the Alkynylalane Reagents</b>                                                                                                                   | S5  |
| <b>III.</b> | <b>Coupling Reaction of Alkynyl Bromide (1a) with Organoalanes Reagents</b>                                                                                           |     |
| 1.          | Optimization of Reaction Conditions for The Coupling Reaction of Alkynyl Bromide with Organoalanes Reagents                                                           | S5  |
| Table S1.   | Optimizations of Coupling Reactions of $C_6H_5C\equiv CAIEt_2$ ( <b>1a</b> ) with $4-CH_3C_6H_4C\equiv CBr$ ( <b>2a</b> ) Catalyzed by the Nickel.                    | S5  |
| Table S2.   | Optimizations of Cross-Coupling Reaction of $C_6H_5C\equiv CAIEt_2$ ( <b>1a</b> ) $4-CH_3C_6H_4C\equiv CBr$ ( <b>2a</b> ) Catalyzed by the $Ni(OAc)_2/P(o-furyl)_3$ . | S6  |
| Table S3.   | Optimizations of Cross-Coupling Reaction of $4-CH_3OC_6H_5C\equiv C-AlEt_2$ ( <b>1b</b> ) with $C_6H_4C\equiv CBr$ ( <b>2o</b> ) Catalyzed by the Nickel.             | S7  |
| Table S4.   | Optimizations of Cross-Coupling Reaction of $TMSC\equiv CAIEt_2$ ( <b>1f</b> ) with $C_6H_4C\equiv CBr$ ( <b>2o</b> ) Catalyzed by the Nickel.                        | S7  |
| 2.          | General Procedures for the Coupling Reaction of Alkynyl Bromide with Organoalanes Reagents                                                                            | S7  |
| <b>IV.</b>  | <b><math>^1H</math> and <math>^{13}C</math> NMR and High-resolution Mass Spectroscopic Data of Coupling Products</b>                                                  | S8  |
| 1.          | 1-methyl-4-(4-phenylbuta-1,3-diynyl)benzene ( <b>3aa</b> )                                                                                                            | S8  |
| 2.          | 1-ethyl-4-(4-phenylbuta-1,3-diynyl)benzene ( <b>3ab</b> )                                                                                                             | S8  |
| 3.          | 1-propyl-3-(4-phenylbuta-1,3-diynyl)benzene ( <b>3ac</b> )                                                                                                            | S8  |
| 4.          | 1-tert-butyl-4-(4-phenylbuta-1,3-diynyl)benzene ( <b>3ad</b> )                                                                                                        | S8  |
| 5.          | 1-methyl-3-(4-phenylbuta-1,3-diynyl)benzene ( <b>3ae</b> )                                                                                                            | S8  |
| 6.          | 1-methoxy-4-(4-phenylbuta-1,3-diynyl)benzene ( <b>3af</b> )                                                                                                           | S8  |
| 7.          | 1-bromo-4-(4-phenylbuta-1,3-diynyl)benzene ( <b>3ag</b> )                                                                                                             | S8  |
| 8.          | 1-chloro-4-(4-phenylbuta-1,3-diynyl)benzene ( <b>3ah</b> )                                                                                                            | S9  |
| 9.          | 1-fluoro-4-(4-phenylbuta-1,3-diynyl)benzene ( <b>3ai</b> )                                                                                                            | S9  |
| 10.         | 1-fluoro-3-(4-phenylbuta-1,3-diynyl)benzene ( <b>3aj</b> )                                                                                                            | S9  |
| 11.         | 1-fluoro-2-(4-phenylbuta-1,3-diynyl)benzene ( <b>3ak</b> )                                                                                                            | S9  |
| 12.         | 1-(4-(4-(trifluoromethyl)phenyl)buta-1,3-diynyl)benzene ( <b>3al</b> )                                                                                                | S9  |
| 13.         | 2-(4-phenylbuta-1,3-diynyl)pyridine ( <b>3am</b> )                                                                                                                    | S9  |
| 14.         | 2-(4-phenylbuta-1,3-diynyl)thiophene ( <b>3an</b> )                                                                                                                   | S9  |
| 15.         | 1-methoxy-4-(4- <i>p</i> -tolylbuta-1,3-diynyl)benzene ( <b>3ba</b> )                                                                                                 | S9  |
| 16.         | 1-(4-(4-chlorophenyl)buta-1,3-diynyl)-4-methoxybenzene ( <b>3bh</b> )                                                                                                 | S10 |
| 17.         | 1-(4-(4-fluorophenyl)buta-1,3-diynyl)-4-methoxybenzene ( <b>3bi</b> )                                                                                                 | S10 |
| 18.         | 1-(4-(3-fluorophenyl)buta-1,3-diynyl)-4-methoxybenzene ( <b>3bj</b> )                                                                                                 | S10 |

|            |                                                                                |     |
|------------|--------------------------------------------------------------------------------|-----|
| 19.        | 2-(4-(4-methoxyphenyl)buta-1,3-diynyl)thiophene ( <b>3bn</b> )                 | S10 |
| 20.        | 4-(3-fluorophenyl)-1-(4-fluorophenyl)buta-1,3-diyne ( <b>3cj</b> )             | S10 |
| 21.        | 4-(2-fluorophenyl)-1-(4-fluorophenyl)buta-1,3-diyne ( <b>3ck</b> )             | S10 |
| 22.        | 1-fluoro-4-(nona-1,3-diynyl)benzene( <b>3cp</b> )                              | S11 |
| 23.        | 1-(4-(4-bromophenyl)buta-1,3-diynyl)-4-methylbenzene ( <b>3dg</b> )            | S11 |
| 24.        | 1-(4-(4-fluorophenyl)buta-1,3-diynyl)-4-methylbenzene ( <b>3di</b> )           | S11 |
| 25.        | 1-(4-(3-fluorophenyl)buta-1,3-diynyl)-4-methylbenzene ( <b>3dj</b> )           | S11 |
| 26.        | 1-(4-(2-fluorophenyl)buta-1,3-diynyl)-4-methylbenzene ( <b>3dk</b> )           | S11 |
| 27.        | 1-(4-(4-trifluoromethylphenyl)buta-1,3-diynyl)-4-methylbenzene ( <b>3dl</b> )  | S11 |
| 28.        | 2-(4-(4-methylphenyl)buta-1,3-diynyl)pyridine ( <b>3dm</b> )                   | S12 |
| 29.        | (4-phenylbuta-1,3-diynyl)- trimethyl-silane ( <b>3fo</b> )                     | S12 |
| 30.        | [4-(4-tert-Butyl-phenyl)-buta-1,3-diynyl]-trimethyl-silane ( <b>3fd</b> )      | S12 |
| 31.        | [4-(4-Methoxy-phenyl)-buta-1,3-diynyl]-trimethyl-silane ( <b>3ff</b> )         | S12 |
| 32.        | [4-(4-Fluoro-phenyl)-buta-1,3-diynyl]-trimethyl-silane ( <b>3fi</b> )          | S12 |
| 33.        | [4-(4-trifluoromethyl-phenyl)-buta-1,3-diynyl]-trimethyl-silane ( <b>3fl</b> ) | S12 |
| 34.        | (4-naphthalen-2-yl-but-1,3-diynyl)-trimethyl-silane ( <b>3fq</b> )             | S12 |
| <b>V.</b>  | <b>References</b>                                                              | S13 |
| <b>VI.</b> | <b><sup>1</sup>H and <sup>13</sup>C NMR Spectra of Coupling Products</b>       | S14 |
| 1.         | 1-methyl-4-(4-phenylbuta-1,3-diynyl)benzene ( <b>3aa</b> )                     | S14 |
| 2.         | 1-ethyl-4-(4-phenylbuta-1,3-diynyl)benzene ( <b>3ab</b> )                      | S16 |
| 3.         | 1-propyl-3-(4-phenylbuta-1,3-diynyl)benzene ( <b>3ac</b> )                     | S18 |
| 4.         | 1-tert-butyl-4-(4-phenylbuta-1,3-diynyl)benzene ( <b>3ad</b> )                 | S20 |
| 5.         | 1-methyl-3-(4-phenylbuta-1,3-diynyl)benzene ( <b>3ae</b> )                     | S22 |
| 6.         | 1-methoxy-4-(4-phenylbuta-1,3-diynyl)benzene ( <b>3af</b> )                    | S24 |
| 7.         | 1-bromo-4-(4-phenylbuta-1,3-diynyl)benzene ( <b>3ag</b> )                      | S26 |
| 8.         | 1-chloro-4-(4-phenylbuta-1,3-diynyl)benzene ( <b>3ah</b> )                     | S28 |
| 9.         | 1-fluoro-4-(4-phenylbuta-1,3-diynyl)benzene ( <b>3ai</b> )                     | S30 |
| 10.        | 1-fluoro-3-(4-phenylbuta-1,3-diynyl)benzene ( <b>3aj</b> )                     | S32 |
| 11.        | 1-fluoro-2-(4-phenylbuta-1,3-diynyl)benzene ( <b>3ak</b> )                     | S34 |
| 12.        | 1-(4-(4-(trifluoromethyl)phenyl)buta-1,3-diynyl)benzene ( <b>3al</b> )         | S36 |
| 13.        | 2-(4-phenylbuta-1,3-diynyl)pyridine ( <b>3am</b> )                             | S38 |
| 14.        | 2-(4-phenylbuta-1,3-diynyl)thiophene ( <b>3an</b> )                            | S40 |
| 15.        | 1-methoxy-4-(4- <i>p</i> -tolylbuta-1,3-diynyl)benzene ( <b>3ba</b> )          | S42 |
| 16.        | 1-(4-(4-chlorophenyl)buta-1,3-diynyl)-4-methoxybenzene ( <b>3bh</b> )          | S44 |
| 17.        | 1-(4-(4-fluorophenyl)buta-1,3-diynyl)-4-methoxybenzene ( <b>3bi</b> )          | S46 |
| 18.        | 1-(4-(3-fluorophenyl)buta-1,3-diynyl)-4-methoxybenzene ( <b>3bj</b> )          | S48 |
| 19.        | 2-(4-(4-methoxyphenyl)buta-1,3-diynyl)thiophene ( <b>3bn</b> )                 | S50 |
| 20.        | 4-(3-fluorophenyl)-1-(4-fluorophenyl)buta-1,3-diyne ( <b>3cj</b> )             | S52 |

|                                                                                     |     |
|-------------------------------------------------------------------------------------|-----|
| 21. 4-(2-fluorophenyl)-1-(4-fluorophenyl)buta-1,3-diyne ( <b>3ck</b> )              | S54 |
| 22. 1-fluoro-4-(nona-1,3-diynyl)benzene ( <b>3cp</b> )                              | S56 |
| 23. 1-(4-(4-bromophenyl)buta-1,3-diynyl)-4-methylbenzene ( <b>3dg</b> )             | S58 |
| 24. 1-(4-(4-fluorophenyl)buta-1,3-diynyl)-4-methylbenzene ( <b>3di</b> )            | S60 |
| 25. 1-(4-(3-fluorophenyl)buta-1,3-diynyl)-4-methylbenzene ( <b>3dj</b> )            | S62 |
| 26. 1-(4-(2-fluorophenyl)buta-1,3-diynyl)-4-methylbenzene ( <b>3dk</b> )            | S64 |
| 27. 1-(4-(4-trifluoromethylphenyl)buta-1,3-diynyl)-4-methylbenzene ( <b>3dl</b> )   | S66 |
| 28. 2-(4-(4-methylphenyl)buta-1,3-diynyl)pyridine ( <b>3dm</b> )                    | S68 |
| 29. (4-phenyl-buta-1,3-diynyl)- trimethyl-silane ( <b>3fo</b> )                     | S70 |
| 30. [4-(4-tert-Butyl-phenyl)-buta-1,3-diynyl]-trimethyl-silane ( <b>3fd</b> )       | S72 |
| 31. [4-(4-Methoxy-phenyl)-buta-1,3-diynyl]-trimethyl-silane ( <b>3ff</b> )          | S74 |
| 32. [4-(4-Fluoro-phenyl)-buta-1,3-diynyl]-trimethyl-silane ( <b>3fi</b> )           | S76 |
| 33. [4-(4-trifluoromethyl-phenyl)-buta-1,3-diynyl]- trimethyl-silane ( <b>3fl</b> ) | S78 |
| 34. (4-naphthalen-2-yl-buta-1,3-diynyl)-trimethyl-silane ( <b>3fq</b> )             | S80 |

## I. Reagents and General Techniques

<sup>1</sup>H NMR and <sup>13</sup>C NMR spectra were recorded on a Varian 400 MHz spectrometer. The chemical shifts are reported relative to TMS. Analytical thin-layer chromatography (TLC) was performed on silica 60F-254 plates. Flash column chromatography was carried out on silica gel (200–400 mesh). HRMS were recorded on a Bruker Micro TOF spectrometer equipped with an ESI ion source. All reactions were carried out under nitrogen atmosphere. Chemical reagents and solvents were purchased from Adamas-beta and Aldrich, and were used without further purification with the exception of these reagents: THF, Ether and Toluene were distilled from Sodium under Nitrogen. Compounds of 1-bromoalkynes **2a-2p** were prepared according to literature procedures<sup>1</sup>. Compounds of propargyl chloride (**2q**)<sup>2b</sup> and propargyl iodide (**2r**)<sup>2a</sup> were prepared according to literature procedures<sup>2</sup>. Purification of reaction products was carried out by flash chromatography. All synthesis and manipulations were carried out under a dry nitrogen atmosphere.

## II. The preparation of the Alkynylalane Reagents

### 1. General Procedures for the preparation diethyl(2-arylethynyl)aluminum (1a-1f) and tri(2-phenylethynyl)aluminum (1h)<sup>3</sup>

To a cooled (0 °C) solution of an alkyne (1.5 mmol) in hexane (3 mL) was added *n*-BuLi (1.5 mmol, 2.5 M in hexane) and stirred for 20 min, followed by an addition of AlEt<sub>2</sub>Cl (1.5 mmol, 1 M in hexane) or AlCl<sub>3</sub>(0.5 mmol). The mixture thus obtained had been stirred at 0°C for 20 min and then at room temperature for 2 h. The resulted solution was filtered, followed by an evaporation of hexane under reduced pressures and then added 2 mL of dry diethyl ether to give a alkynylaluminum reagent which was used in the coupling reactions.

### 2. General Procedures for the preparation dimethyl(2-phenylethynyl)aluminum (C<sub>6</sub>H<sub>5</sub>C≡CAI Me<sub>2</sub>)(1g)<sup>3e</sup>

The preparation of hept-1-ynyl-benzene (entry1) is representative. Alane solution preparation: A dry and argon-flushed flask equipped with a magnetic stirrer and condenser was charged with a commercial trimethylaluminum solution (10 mL, 2 M in heptane) (CAUTION: trimethylaluminum is flammable), and triethylamine (0.28 mL, 2 mmol) was then added dropwise via a syringe. 1-ethynylbenzene (2.36 mL, 18mmol) was dropwise added 5 min later, and the reaction mixture was stirred at 60 °C for 6 h, until the gas evolution ceased. The prepared alane solution can be stored under argon in the dark for several days.

## III. Coupling Reaction of Alkynyl Bromide with Organoalanes Reagents

### III.1. Optimization of Reaction Conditions for The Coupling Reaction of C<sub>6</sub>H<sub>5</sub>C≡CAI Et<sub>2</sub> (1a) 4-CH<sub>3</sub>C<sub>6</sub>H<sub>4</sub>C≡CBr (2a) and Catalyzed by the Nickel.

**Table S1.** Optimizations of Coupling Reactions of C<sub>6</sub>H<sub>5</sub>C≡CAI Et<sub>2</sub> (1a) with 4-CH<sub>3</sub>C<sub>6</sub>H<sub>4</sub>C≡CBr (2a) Catalyzed by the Nickel. <sup>a</sup>

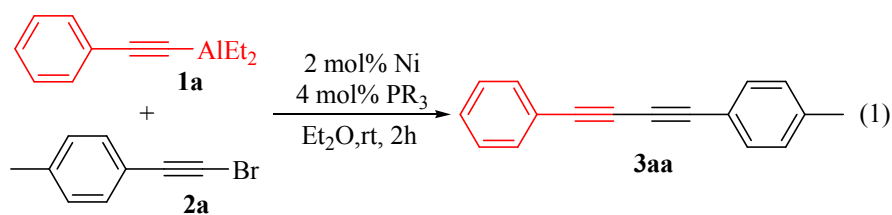

| Entry | Catalyst              | Ligand                            | Solvent           | Yield(%) <sup>b</sup> |
|-------|-----------------------|-----------------------------------|-------------------|-----------------------|
| 1     | NiCl <sub>2</sub>     | -                                 | Et <sub>2</sub> O | 0                     |
| 2     | NiCl <sub>2</sub>     | PPh <sub>3</sub>                  | Et <sub>2</sub> O | 34                    |
| 3     | NiCl <sub>2</sub>     | PCy <sub>3</sub>                  | Et <sub>2</sub> O | 23                    |
| 4     | NiCl <sub>2</sub>     | ( <i>o</i> -tolyl) <sub>3</sub> P | Et <sub>2</sub> O | 19                    |
| 5     | NiCl <sub>2</sub>     | ( <i>p</i> -tolyl) <sub>3</sub> P | Et <sub>2</sub> O | 40                    |
| 6     | NiCl <sub>2</sub>     | ( <i>o</i> -furyl) <sub>3</sub> P | Et <sub>2</sub> O | 42                    |
| 7     | NiBr <sub>2</sub>     | ( <i>o</i> -furyl) <sub>3</sub> P | Et <sub>2</sub> O | 65                    |
| 8     | Ni(acac) <sub>2</sub> | ( <i>o</i> -furyl) <sub>3</sub> P | Et <sub>2</sub> O | 48                    |
| 9     | Ni(OAc) <sub>2</sub>  | ( <i>o</i> -furyl) <sub>3</sub> P | Et <sub>2</sub> O | 75                    |
| 10    | Ni(OAc) <sub>2</sub>  | ( <i>o</i> -furyl) <sub>3</sub> P | Toluene           | 75                    |
| 11    | Ni(OAc) <sub>2</sub>  | ( <i>o</i> -furyl) <sub>3</sub> P | THF               | 52                    |

<sup>a</sup>**1a/2a** = 1.0/0.5 mmol, 2 mL solvent, room temperature. <sup>b</sup>Isolated yield.

**Table S2.** Optimizations of Cross-Coupling Reaction of C<sub>6</sub>H<sub>5</sub>C≡CAlEt<sub>2</sub> (**1a**) 4-CH<sub>3</sub>C<sub>6</sub>H<sub>4</sub>C≡CBr (**2a**) Catalyzed by the Ni(OAc)<sub>2</sub>/P(*o*-furyl)<sub>3</sub>.<sup>a</sup>

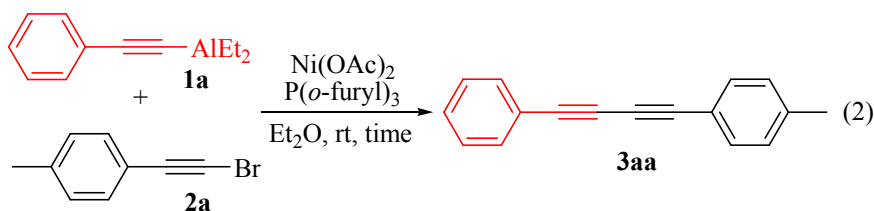

| Entry          | Ni(OAc) <sub>2</sub> (mol%) | P( <i>o</i> -furyl) <sub>3</sub> (mol%) | Additive<br>(1.equiv.) | Time(h) | Yield(%) <sup>d</sup> |
|----------------|-----------------------------|-----------------------------------------|------------------------|---------|-----------------------|
| 1              | 10                          | 20                                      | -                      | 4       | 78                    |
| 2              | 15                          | 30                                      | -                      | 4       | 71                    |
| 3              | 2                           | 4                                       | -                      | 4       | 81                    |
| 4              | 2                           | 4                                       | -                      | 5       | 78                    |
| 5              | 2                           | 4                                       | -                      | 2       | 87                    |
| 6              | 2                           | 2                                       | -                      | 2       | 78                    |
| 7              | 2                           | 6                                       | -                      | 2       | 87                    |
| 8 <sup>b</sup> | 2                           | 4                                       | -                      | 2       | 62                    |
| 9 <sup>c</sup> | 2                           | 4                                       | -                      | 2       | 83                    |
| 10             | 2                           | 4                                       | LiCl                   | 2       | 56                    |

<sup>a</sup>**1a/2a** = 1.0/0.5 mmol, 2 mL Et<sub>2</sub>O, room temperature. <sup>b</sup>**1a/2a** = 1.5/1 mmol.

<sup>c</sup>**1a/2a** = 2.5/1 mmol. <sup>d</sup>Isolated yield.

**Table S3.** Optimizations of Cross-Coupling Reaction of 4-CH<sub>3</sub>OC<sub>6</sub>H<sub>5</sub>C≡CAI Et<sub>2</sub> (**1b**) with C<sub>6</sub>H<sub>4</sub>C≡CBr (**2o**) Catalyzed by the Nickel.<sup>a</sup>

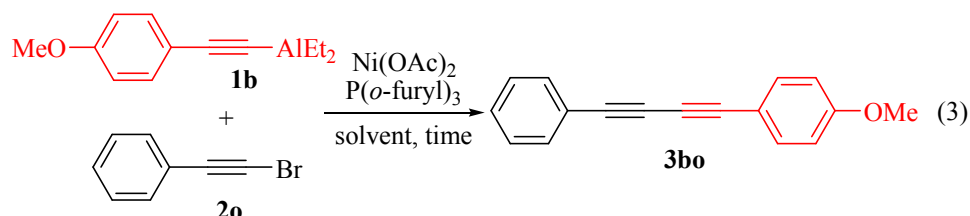

| Entry          | Ni(OAc) <sub>2</sub> (mol%) | P( <i>o</i> -furyl) <sub>3</sub> (mol%) | Solvent           | Time(h) | Yield (%) <sup>c</sup> |
|----------------|-----------------------------|-----------------------------------------|-------------------|---------|------------------------|
| 1              | 2                           | 4                                       | Et <sub>2</sub> O | 2       | 62                     |
| 2              | 2                           | 4                                       | Toluene           | 2       | 53                     |
| 3 <sup>b</sup> | 2                           | 4                                       | Toluene           | 2       | 65                     |
| 4 <sup>b</sup> | 2                           | 4                                       | Toluene           | 3       | 67                     |
| 5 <sup>b</sup> | 5                           | 10                                      | Toluene           | 3       | 75                     |

<sup>a</sup>**1b/2o** = 1.0/0.5 mmol, solvent 2mL, room temperature. <sup>b</sup>**1b/2o** = 1.0/0.5 mmol, 60°C.

<sup>c</sup>Isolated yield.

**Table S4.** Optimizations of Cross-Coupling Reaction of TMS≡CAI Et<sub>2</sub> (**1f**) with C<sub>6</sub>H<sub>4</sub>C≡CBr (**2o**) Catalyzed by the Nickel.<sup>a</sup>

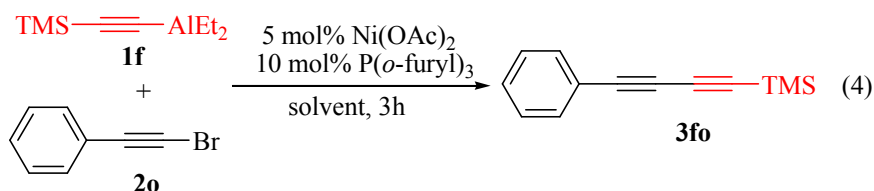

| Entry | T (°C) | Solvent           | Yield (%) <sup>b</sup> |
|-------|--------|-------------------|------------------------|
| 1     | 60     | Toluene           | 52                     |
| 2     | rt     | Et <sub>2</sub> O | 58                     |
| 3     | 60     | DME               | 16                     |
| 4     | rt     | Toluene           | 80                     |

<sup>a</sup>**1f/2o** = 1.0/0.5mmol, solvent 2mL. <sup>b</sup>Isolated yield.

### III.2. General Procedures for the Coupling Reaction of Alkynyl Bromide with Organoalanes Reagents

Under a dry nitrogen atmosphere, a mixture of Ni(OAc)<sub>2</sub> (3.52 mg, 0.02 mmol or 8.80 mg, 0.05 mmol) and tri(*o*-furyl)phosphine (9.28 mg, 0.05 mmol or 23.20 mg, 0.10 mmol) in a reaction vessel was added an alkynylaluminum compound (1.0 mmol) in 2 mL Et<sub>2</sub>O or Toluene or DME followed by an addition of alkynylbromides (0.50 mmol). The resulted solution was stirred at room temperature or 60°C for 2-3 h. After completion the reaction, the

mixture was diluted with saturated ammonium chloride solution (5 mL) and extracted with ethyl acetate (3 × 15 mL). The combined organic layers were dried over anhydrous Na<sub>2</sub>SO<sub>4</sub>, filtered and evaporated *in vacuo*. The residue was subjected to flash column chromatography on silica gel (hexane or ethyl acetate and hexane) to afford the corresponding conjugated 1,3-diyne **3**.

#### IV. <sup>1</sup>H and <sup>13</sup>C NMR and High-resolution Mass Spectroscopic Data of Coupling

##### Products

1-methyl-4-(4-phenylbuta-1,3-diynyl)benzene (**3aa**)<sup>[4]</sup>: Eluent: hexane; white solid; yield: 0.095 g (87%). <sup>1</sup>H NMR (400 MHz, CDCl<sub>3</sub>): δ = 7.54-7.52 (m, 2H), 7.44-7.42 (m, 2H), 7.37-7.32 (m, 3H), 7.15-7.13 (m, 2H), 2.36 (s, 3H) ppm. <sup>13</sup>C{<sup>1</sup>H} NMR (100 MHz, CDCl<sub>3</sub>): δ = 139.7, 139.6, 132.6, 129.3, 129.2, 128.6, 121.9, 118.7, 82.0, 81.7, 74.1, 73.5, 21.7 ppm.

1-ethyl-4-(4-phenylbuta-1,3-diynyl)benzene (**3ab**)<sup>[4]</sup>: Eluent: hexane; white solid; yield: 0.092 g (85%). <sup>1</sup>H NMR (400 MHz, CDCl<sub>3</sub>): δ = 7.53-7.51 (m, 2H), 7.46-7.43 (m, 2H), 7.37-7.33 (m, 3H), 7.24-7.15 (m, 2H), 2.65 (q, *J* = 3.8 Hz, 2H), 1.22 (t, *J* = 1.9 Hz, 3H) ppm. <sup>13</sup>C{<sup>1</sup>H} NMR (100 MHz, CDCl<sub>3</sub>): δ = 145.8, 132.5, 129.3, 129.1, 128.5, 128.1, 122.0, 119.1, 81.6, 81.3, 74.2, 73.5, 29.0, 15.3 ppm.

1-propyl-3-(4-phenylbuta-1,3-diynyl)benzene (**3ac**)<sup>[4]</sup>: Eluent: hexane; white solid; yield: 0.082 g (86%). <sup>1</sup>H NMR (400 MHz, CDCl<sub>3</sub>): δ = 7.54-7.52 (m, 2H), 7.45-7.43 (m, 2H), 7.38-7.31 (m, 3H), 7.16-7.14 (m, 2H), 2.58 (t, *J* = 1.9 Hz, 2H), 1.63 (q, *J* = 3.8 Hz, 2H), 0.93 (t, *J* = 1.8 Hz, 3H) ppm. <sup>13</sup>C{<sup>1</sup>H} NMR (100 MHz, CDCl<sub>3</sub>): δ = 144.4, 132.6, 129.4, 129.2, 128.8, 128.6, 122.0, 119.1, 81.7, 81.3, 74.2, 73.4, 38.2, 24.4, 13.9 ppm.

1-tert-butyl-4-(4-phenylbuta-1,3-diynyl)benzene (**3ad**)<sup>[4]</sup>: Eluent: hexane; white solid; yield: 0.082 g (84%). <sup>1</sup>H NMR (400 MHz, CDCl<sub>3</sub>): δ = 7.53-7.51 (m, 2H), 7.48-7.45 (m, 2H), 7.37-7.33 (m, 5H), 1.31 (s, 9H) ppm. <sup>13</sup>C{<sup>1</sup>H} NMR (100 MHz, CDCl<sub>3</sub>): δ = 152.7, 132.6, 132.4, 129.3, 128.6, 125.6, 122.1, 119.0, 81.7, 81.3, 74.3, 73.6, 35.0, 31.2 ppm.

1-methyl-3-(4-phenylbuta-1,3-diynyl)benzene (**3ae**)<sup>[4]</sup>: Eluent: hexane; white solid; yield: 0.087 g (81%). <sup>1</sup>H NMR (400 MHz, CDCl<sub>3</sub>): δ = 7.53-7.51 (m, 2H), 7.34-7.32 (m, 5H), 7.24-7.16 (m, 2H), 2.33 (s, 3H) ppm. <sup>13</sup>C{<sup>1</sup>H} NMR (100 MHz, CDCl<sub>3</sub>): δ = 138.3, 133.1, 132.6, 130.3, 129.7, 129.2, 128.6, 128.5, 122.0, 121.7, 82.0, 81.5, 74.1, 73.7, 21.3 ppm.

1-methoxy-4-(4-phenylbuta-1,3-diynyl)benzene (**3af**)<sup>[5]</sup>: Eluent: hexane; white solid; yield: 0.069 g (64%). <sup>1</sup>H NMR (400 MHz, CDCl<sub>3</sub>): δ = 7.53-7.46 (m, 4H), 7.37-7.31 (m, 3H), 6.86 (d, *J* = 2 Hz, 2H), 3.83 (s, 3H) ppm. <sup>13</sup>C{<sup>1</sup>H} NMR (100 MHz, CDCl<sub>3</sub>): δ = 160.5, 134.2, 132.6, 129.1, 128.5, 122.1, 114.3, 113.9, 82.0, 81.5, 74.3, 73.2, 55.5 ppm.

1-bromo-4-(4-phenylbuta-1,3-diynyl)benzene (**3ag**)<sup>[6]</sup>: Eluent: hexane; pale yellow solid; yield: 0.08 g (74%). <sup>1</sup>H NMR (400 MHz, CDCl<sub>3</sub>): δ = 7.53-7.45 (m, 4H), 7.37-7.31 (m, 5H)



ppm.  $^{13}\text{C}\{^1\text{H}\}$  NMR (100 MHz,  $\text{CDCl}_3$ ):  $\delta$  = 134.0, 132.7, 131.9, 129.3, 128.6, 125.8, 121.9, 120.9, 81.7, 80.5, 75.2, 74.0 ppm.

1-chloro-4-(4-phenylbuta-1,3-diynyl)benzene (**3ah**)<sup>[4]</sup>: Eluent: hexane; white solid; yield: 0.097 g (82%).  $^1\text{H}$  NMR (400 MHz,  $\text{CDCl}_3$ ):  $\delta$  = 7.56-7.52(m, 2H), 7.46-7.44 (m, 2H), 7.39-7.31 (m, 5H) ppm.  $^{13}\text{C}\{^1\text{H}\}$  NMR (100 MHz,  $\text{CDCl}_3$ ):  $\delta$  = 135.5, 133.8, 132.7, 129.5, 129.0, 128.6, 121.7, 120.4, 82.3, 80.4, 75.0, 73.8 ppm.

1-fluoro-4-(4-phenylbuta-1,3-diynyl)benzene (**3ai**)<sup>[4]</sup>: Eluent: hexane; white solid; yield: 0.099 g (90%).  $^1\text{H}$  NMR (400 MHz,  $\text{CDCl}_3$ ):  $\delta$  = 7.55-7.49(m, 4H), 7.39-7.32 (m, 3H), 7.05-7.01 (m, 2H) ppm.  $^{13}\text{C}\{^1\text{H}\}$  NMR (100 MHz,  $\text{CDCl}_3$ ):  $\delta$  = 163.2 (d,  $J$  = 250Hz), 134.6 (q,  $J$  = 87Hz), 132.6, 129.3 (d,  $J$  = 65Hz), 128.6 (d,  $J$  = 15Hz), 121.9 (d,  $J$  = 107Hz), 118.0 (t,  $J$  = 20Hz), 116.1 (q,  $J$  = 23Hz), 81.7, 80.6, 74.0, 73.9 ppm.

1-fluoro-3-(4-phenylbuta-1,3-diynyl)benzene (**3aj**): Eluent: hexane; white solid; yield: 0.102 g (93%).  $^1\text{H}$  NMR (400 MHz,  $\text{CDCl}_3$ ):  $\delta$  = 7.54-7.52 (m, 2H), 7.38-7.30 (m, 5H), 7.24-7.20 (m, 1H), 7.08-7.06 (m, 1H) ppm.  $^{13}\text{C}\{^1\text{H}\}$  NMR (100 MHz,  $\text{CDCl}_3$ ):  $\delta$  = 163.2 (d,  $J$  = 250Hz), 134.6 (q,  $J$  = 87Hz), 132.6, 129.3 (d,  $J$  = 65Hz), 128.6 (d,  $J$  = 15Hz), 121.9 (d,  $J$  = 107Hz), 118.0 (t,  $J$  = 20Hz), 116.1 (q,  $J$  = 23Hz), 81.7, 80.6, 74.0, 73.9 ppm. HRMS (ESI)  $m/z$  calcd for  $\text{C}_{16}\text{H}_{10}\text{F}^+(\text{M}+\text{H})^+$  221.07610, found 221.07611.

1-fluoro-2-(4-phenylbuta-1,3-diynyl)benzene (**3ak**): Eluent: hexane; white solid; yield: 0.095 g (86%).  $^1\text{H}$  NMR (400 MHz,  $\text{CDCl}_3$ ):  $\delta$  = 7.54-7.49 (m, 3H), 7.40-7.32 (m, 4H), 7.16-7.07 (m, 2H) ppm.  $^{13}\text{C}\{^1\text{H}\}$  NMR (100 MHz,  $\text{CDCl}_3$ ):  $\delta$  = 163.2 (d,  $J$  = 251Hz), 134.6, 132.6 (d,  $J$  = 4.5Hz), 131.1 (d,  $J$  = 6Hz), 129.4 (d,  $J$  = 17.5Hz), 128.6, 124.2 (d,  $J$  = 3.7Hz), 121.6, 115.8 (t,  $J$  = 20.6Hz), 110.8 (d,  $J$  = 15.5Hz), 82.8, 78.8, 74.9, 73.8 ppm. HRMS (ESI)  $m/z$  calcd for  $\text{C}_{16}\text{H}_{10}\text{F}^+(\text{M}+\text{H})^+$  221.07610, found 221.07599.

1-(4-(4-(trifluoromethyl)phenyl)buta-1,3-diynyl)benzene (**3al**)<sup>[8]</sup>: Eluent: hexane; white solid; yield: 0.124 g (92%).  $^1\text{H}$  NMR (400 MHz,  $\text{CDCl}_3$ ):  $\delta$  = 7.63-7.58 (m, 4H), 7.55-7.53 (m, 2H), 7.41-7.33 (m, 3H) ppm.  $^{13}\text{C}\{^1\text{H}\}$  NMR (100 MHz,  $\text{CDCl}_3$ ):  $\delta$  = 132.8 (t,  $J$  = 10.6Hz), 130.9 (d,  $J$  = 42.6Hz), 129.7, 128.6, 125.8, 125.6 (d,  $J$  = 4Hz), 125.5 (d,  $J$  = 4Hz), 122.5, 121.5, 83.0, 79.9, 76.6, 73.6 ppm.

2-(4-phenylbuta-1,3-diynyl)pyridine (**3am**)<sup>[7]</sup>: Eluent: hexane; pale yellow solid; yield: 0.096 g (94%).  $^1\text{H}$  NMR (400 MHz,  $\text{CDCl}_3$ ):  $\delta$  = 8.67-8.66(m, 1H), 7.93-7.82 (m, 2H), 7.73-7.71 (m, 2H), 7.50-7.47 (m, 3H), 7.37-7.35 (m, 1H) ppm.  $^{13}\text{C}\{^1\text{H}\}$  NMR (100 MHz,  $\text{CDCl}_3$ ):  $\delta$  = 152.9, 149.3, 137.1, 131.9, 129.1, 128.6, 123.3, 121.5, 119.7, 99.2, 98.5, 85.7, 83.8 ppm.

2-(4-phenylbuta-1,3-diynyl)thiophene (**3an**)<sup>[7]</sup>: Eluent: hexane; brown solid; yield: 0.087 g (83%).  $^1\text{H}$  NMR (400 MHz,  $\text{CDCl}_3$ ):  $\delta$  = 7.52-7.51 (m, 2H), 7.48-7.30 (m, 5H), 6.99 (s, 1H) ppm.  $^{13}\text{C}\{^1\text{H}\}$  NMR (100 MHz,  $\text{CDCl}_3$ ):  $\delta$  = 134.4, 132.6, 129.4, 128.7, 127.3, 125.6, 122.2,

121.8, 83.8, 78.1, 74.7, 73.9 ppm.

1-methoxy-4-(4-*p*-tolylbuta-1,3-diynyl)benzene (**3ba**)<sup>[7]</sup>: Eluent: hexane; white solid; yield: 0.076 g (62%). <sup>1</sup>H NMR (400 MHz, CDCl<sub>3</sub>): δ = 7.38 (d, *J* = 2.1Hz, 2H), 7.33 (d, *J* = 2Hz, 2H), 7.05 (d, *J* = 2.1Hz, 2H), 6.77 (d, *J* = 2.1Hz, 2H), 3.73 (s, 3H), 2.28 (s, 3H) ppm. <sup>13</sup>C{<sup>1</sup>H} NMR (100 MHz, CDCl<sub>3</sub>): δ = 160.4, 139.5, 134.2, 132.5, 129.3, 119.0, 114.3, 114.0, 81.6, 81.4, 73.7, 73.0, 55.5, 21.7 ppm.

1-(4-(4-chlorophenyl)buta-1,3-diynyl)-4-methoxybenzene (**3bh**)<sup>[9]</sup>: Eluent: hexane; pale yellow solid; yield: 0.096 g (72%). <sup>1</sup>H NMR (400 MHz, CDCl<sub>3</sub>): δ = 7.46 (d, *J* = 2Hz, 4H), 7.43 (d, *J* = 2Hz, 2H), 7.30 (d, *J* = 1.1Hz, 2H), 6.85 (d, *J* = 2.1Hz, 2H), 3.82 (s, 3H) ppm. <sup>13</sup>C{<sup>1</sup>H} NMR (100 MHz, CDCl<sub>3</sub>): δ = 160.6, 135.3, 134.3, 133.7, 129.0, 120.6, 114.3, 113.6, 82.5, 80.0, 75.3, 72.7, 55.5 ppm.

1-(4-(4-fluorophenyl)buta-1,3-diynyl)-4-methoxybenzene (**3bi**)<sup>[4]</sup>: Eluent: hexane; white solid; yield: 0.089g (71%). <sup>1</sup>H NMR (400 MHz, CDCl<sub>3</sub>): δ = 7.52-7.46 (m, 5H), 7.01 (d, *J* = 1.1Hz, 2H), 6.85 (d, *J* = 2.1Hz, 2H), 3.83 (s, 3H) ppm. <sup>13</sup>C{<sup>1</sup>H} NMR (100 MHz, CDCl<sub>3</sub>): δ = 163.0 (d, *J* = 240Hz), 160.6, 134.6, 134.3 (d, *J* = 24.6Hz), 118.3, 115.9 (d, *J* = 22.2Hz), 114.3, 113.7, 82.0, 80.1, 74.1, 72.7, 55.5 ppm.

1-(4-(3-fluorophenyl)buta-1,3-diynyl)-4-methoxybenzene (**3bj**)<sup>[10]</sup>: Eluent: hexane; white solid; yield: 0.090g (72%). <sup>1</sup>H NMR (400 MHz, CDCl<sub>3</sub>): δ = 7.48-7.46 (m, 2H), 7.28-7.25 (m, 2H), 7.20 (d, *J* = 2Hz, 1H), 7.06 (d, *J* = 1.3Hz, 1H), 6.85 (d, *J* = 2Hz, 2H), 3.81 (s, 3H) ppm. <sup>13</sup>C{<sup>1</sup>H} NMR (100 MHz, CDCl<sub>3</sub>): δ = 162.3 (d, *J* = 246Hz), 160.6, 134.3, 130.1, 128.5 (d, *J* = 2Hz), 124.0 (d, *J* = 9Hz), 119.1 (d, *J* = 22Hz), 116.6 (d, *J* = 21.1Hz), 114.3, 113.5, 82.7, 79.7, 75.2, 72.6, 55.5 ppm. HRMS (ESI) *m/z* calcd for C<sub>17</sub>H<sub>12</sub>O<sup>+</sup> (M+H)<sup>+</sup> 251.08667, found 251.08664.

2-(4-(4-methoxyphenyl)buta-1,3-diynyl)thiophene (**3bn**)<sup>[8]</sup>: Eluent: hexane; white solid; yield: 0.088 g (74%). <sup>1</sup>H NMR (400 MHz, CDCl<sub>3</sub>): δ = 7.47-7.45 (m, 2H), 7.33-7.29 (m, 2H), 7.00-6.98 (m, 1H), 6.85 (d, *J* = 2Hz, 2H), 3.82 (s, 3H) ppm. <sup>13</sup>C{<sup>1</sup>H} NMR (100 MHz, CDCl<sub>3</sub>): δ = 160.6, 134.1, 128.6, 127.3, 122.4, 114.3, 113.7, 84.0, 78.6, 74.1, 72.7, 55.5, 31.1 ppm.

4-(3-fluorophenyl)-1-(4-fluorophenyl)buta-1,3-diyne (**3cj**): Eluent: hexane; white solid; yield: 0.066 g (55%). <sup>1</sup>H NMR (400 MHz, CDCl<sub>3</sub>): δ = 7.51-7.49 (m, 2H), 7.30-7.27 (m, 2H), 7.22-7.20 (m, 1H), 7.08-7.02 (m, 3H) ppm. <sup>13</sup>C{<sup>1</sup>H} NMR (100 MHz, CDCl<sub>3</sub>): δ = 163.2 (d, *J* = 242Hz), 162.4 (t, *J* = 245.8Hz), 134.7 (t, *J* = 78.5Hz), 130.2 (d, *J* = 9.7Hz), 128.6, 125.6 (d, *J* = 10Hz), 119.3 (d, *J* = 23.1Hz), 117.7 (d, *J* = 3.7Hz), 117.0, 116.2 (t, *J* = 41.4Hz), 81.2, 80.1, 74.8, 73.5 ppm. HRMS (ESI) *m/z* calcd for C<sub>16</sub>H<sub>9</sub>F<sub>2</sub><sup>+</sup> (M+H)<sup>+</sup> 239.06668, found 239.06714.

4-(2-fluorophenyl)-1-(4-fluorophenyl)buta-1,3-diyne (**3ck**): Eluent: hexane; white solid; yield: 0.063 g (53%). <sup>1</sup>H NMR (400 MHz, CDCl<sub>3</sub>): δ=7.56-7.49 (m, 3H), 7.38-7.33 (m, 1H), 7.14-7.02 (m, 4H) ppm. <sup>13</sup>C{<sup>1</sup>H} NMR (100 MHz, CDCl<sub>3</sub>): δ=164.7 (d, *J* = 64.2Hz), 162.2 (d, *J* = 62.6Hz), 134.5 (d, *J* = 8.5Hz), 134.2, 131(d, *J* = 8Hz), 124.1 (d, *J* = 3.8Hz), 117.7, 115.8 (q, *J* = 24.3Hz), 110.6 (t, *J* = 15.6Hz), 81.7, 78.7, 74.9, 73.6 ppm. HRMS (ESI) *m/z* calcd for C<sub>16</sub>H<sub>9</sub>F<sub>2</sub><sup>+</sup>(M+H)<sup>+</sup> 239.06668, found 239.06602.

1-fluoro-4-(nona-1,3-diynyl)benzene(**3cp**)<sup>[11]</sup>: Eluent: hexane; white solid; yield: 0.054g (51%).<sup>1</sup>H NMR (400 MHz, CDCl<sub>3</sub>): δ=7.47-7.46 (m, 2H),7.02-6.98 (m, 2H), 2.57-2.54 (m, 2H), 1.60-1.56 (m, 2H), 1.41-1.33 (m, 4H), 0.91 (t, *J* = 3Hz, 3H) ppm. <sup>13</sup>C{<sup>1</sup>H} NMR (100 MHz, CDCl<sub>3</sub>): δ= 162.9 (d, *J* = 249.2Hz), 134.5 (d, *J* = 8.5Hz), 118.3, 115.9 (d, *J* = 22.1Hz), 85.1, 74.3, 73.8, 65.0, 31.2, 28.1, 22.3, 19.7, 14.1 ppm.

1-(4-(4-bromophenyl)buta-1,3-diynyl)-4-methylbenzene (**3dg**)<sup>[8]</sup>: Eluent: hexane; pale yellow solid; yield: 0.093 g (68%).<sup>1</sup>H NMR (400 MHz, CDCl<sub>3</sub>): δ=7.47 (d, *J* = 2.1 Hz, 2H), 7.42 (d, *J* = 2.1 Hz, 2H),7.37 (d, *J* = 2.1Hz, 2H), 7.15(d, *J* = 2.0Hz, 2H), 2.37(s, 3H) ppm.<sup>13</sup>C{<sup>1</sup>H} NMR (100 MHz, CDCl<sub>3</sub>): δ=140.0, 133.9,132.6, 132.0, 131.9, 129.4, 123.7, 121.0, 118.6, 82.7, 80.2, 75.3, 73.2, 21.8 ppm.

1-(4-(4-fluorophenyl)buta-1,3-diynyl)-4-methylbenzene (**3di**)<sup>[7]</sup>: Eluent: hexane; white solid; yield: 0.078 g (62%). <sup>1</sup>H NMR (400 MHz, CDCl<sub>3</sub>): δ=7.52-7.49 (m, 2H),7.43-7.41 (m, 2H), 7.15-7.13 (m, 2H), 7.05-7.00 (m, 2H), 2.36 (s, 3H). <sup>13</sup>C{<sup>1</sup>H} NMR (100 MHz, CDCl<sub>3</sub>): δ =162.5 (d, *J* = 240Hz), 139.8, 134.6 (d, *J* = 8.3Hz), 132.6, 129.4, 118.7, 118.2, 115.9 (d, *J* = 22.1Hz), 82.0, 80.2, 74.0, 73.3 , 21.8.

1-(4-(3-fluorophenyl)buta-1,3-diynyl)-4-methylbenzene (**3dj**): Eluent: hexane; pale yellow solid; yield: 0.085 g (73%). <sup>1</sup>H NMR (400 MHz, CDCl<sub>3</sub>): δ= 7.57-7.53 (m, 1H), 7.49-7.40 (m, 2H), 7.39-7.36 (m, 1H), 7.30-7.11 (m, 4H), 2.41 (s, 3H) ppm. <sup>13</sup>C{<sup>1</sup>H} NMR (100 MHz, CDCl<sub>3</sub>): δ=163.7 (d, *J* = 252Hz), 139.8, 134.2, 132.4, 130.8 (d, *J* = 11Hz), 129.2, 124.1 (d, *J* = 3.7 Hz), 118.4, 115.6 (d, *J* = 21Hz), 110.7, 83.0, 78.8, 74.4, 73.1, 21.6 ppm. HRMS (ESI) *m/z* calcd for C<sub>17</sub>H<sub>12</sub>F<sup>+</sup>(M+H)<sup>+</sup> 235.09176, found 235.09195.

1-(4-(2-fluorophenyl)buta-1,3-diynyl)-4-methylbenzene (**3dk**): Eluent: hexane; white solid; yield: 0.094 g (80%).<sup>1</sup>H NMR (400 MHz, CDCl<sub>3</sub>): δ=7.41 (d, *J* = 7.2 Hz, 2H),7.29-7.27 (m, 2H),7.20-7.17(m, 1H), 7.13 (d, *J* = 6.2 Hz, 2H), 7.07-7.03(m, 1H), 2.35(s, 3H) ppm.<sup>13</sup>C{<sup>1</sup>H} NMR (100 MHz, CDCl<sub>3</sub>): δ =162.4(d, *J* = 245.8Hz), 140.0, 132.6, 130.2 (d, *J* = 8.6Hz), 129.4, 128.5 (d, *J* = 3.1Hz), 123.9 (d, *J* = 9.4Hz), 119.2 (d, *J* = 22.9Hz), 118.5, 116.7 (d, *J* = 21.1Hz), 82.7, 79.9, 75.1, 73.1, 21.8 ppm. HRMS (ESI) *m/z* calcd for C<sub>17</sub>H<sub>12</sub>F<sup>+</sup>(M+H)<sup>+</sup> 235.09176, found 235.09164.

1-(4-(4-trifluoromethylphenyl)buta-1,3-diynyl)-4-methylbenzene (**3dl**): Eluent: hexane; white

solid; yield: 0.106 g (75%).  $^1\text{H}$  NMR (400 MHz,  $\text{CDCl}_3$ ):  $\delta$ =7.63-7.56 (m, 4H), 7.44 (d,  $J$  = 7.2 Hz, 2H), 7.16 (d,  $J$  = 7.2 Hz, 2H), 2.38 (s, 3H) ppm.  $^{13}\text{C}\{^1\text{H}\}$  NMR (100 MHz,  $\text{CDCl}_3$ ):  $\delta$  =140.2, 132.9, 132.7 (d,  $J$  = 13.8Hz), 130.7 (d,  $J$  = 32Hz), 129.4, 126.0, 125.5 (q,  $J$  = 37Hz), 122.6, 118.4, 83.4, 79.6, 76.6, 73.0, 21.8 ppm. HRMS (ESI)  $m/z$  calcd for  $\text{C}_{17}\text{H}_9\text{F}_4^+(\text{M}+\text{H})^+$  289.06349, found 289.06368.

2-(4-(4-methylphenyl)buta-1,3-diynyl)pyridine (**3dm**)<sup>[12]</sup>: Eluent: hexane; brown solid; yield: 0.078 g (72%).  $^1\text{H}$  NMR (400 MHz,  $\text{CDCl}_3$ ):  $\delta$ =8.54-8.53 (m, 1H), 7.81-7.70 (m, 2H), 7.52-7.48 (m, 2H), 7.24-7.21 (m, 1H), 7.18 (d,  $J$  = 7.2Hz, 2H) ppm.  $^{13}\text{C}\{^1\text{H}\}$  NMR (100 MHz,  $\text{CDCl}_3$ ):  $\delta$ =153.0, 149.2, 139.4, 137.1, 131.8, 129.2 (d,  $J$  = 20Hz), 123.2, 121.6, 119.4 (d,  $J$  = 36.2Hz), 99.5, 98.8, 85.1, 83.2, 21.7ppm.

(4-phenyl-buta-1,3-diynyl)-trimethyl-silane (**3fo**)<sup>[13]</sup>: Eluent: hexane; pale yellow solid; yield: 0.079 g (80%).  $^1\text{H}$  NMR (400 MHz,  $\text{CDCl}_3$ ):  $\delta$  = 7.50-7.48 (m, 2H), 7.37-7.30 (m, 3H), 0.23 (s, 9H) ppm.  $^{13}\text{C}\{^1\text{H}\}$  NMR (100 MHz,  $\text{CDCl}_3$ ):  $\delta$  =132.8, 129.5, 128.6, 121.5, 90.8, 87.9, 76.8, 74.3, -0.24ppm.

[4-(4-tert-Butyl-phenyl)-buta-1,3-diynyl]-trimethyl-silane (**3fd**)<sup>[14]</sup>: Eluent: hexane; pale yellow solid; yield: 0.094 g (74%).  $^1\text{H}$  NMR (400 MHz,  $\text{CDCl}_3$ ):  $\delta$  = 7.43 (d,  $J$  = 2.0Hz, 2H), 7.33 (d,  $J$  = 2.1Hz, 2H), 1.30 (s, 9H), 0.23 (s, 9H) ppm.  $^{13}\text{C}\{^1\text{H}\}$  NMR (100 MHz,  $\text{CDCl}_3$ ):  $\delta$  =153.0, 132.6, 125.6, 118.4, 90.3, 88.1, 76.8, 73.6, 35.1, 31.2, -0.21ppm.

[4-(4-Methoxy-phenyl)-buta-1,3-diynyl]-trimethyl-silane (**3ff**)<sup>[13]</sup>: Eluent: hexane; pale yellow solid; yield: 0.088 g (76%).  $^1\text{H}$  NMR (400 MHz,  $\text{CDCl}_3$ ):  $\delta$  = 7.43 (d,  $J$  = 2.2Hz, 2H), 6.83 (d,  $J$  = 2.2Hz, 2H), 3.81 (s, 3H) 0.22 (s, 9H) ppm.  $^{13}\text{C}\{^1\text{H}\}$  NMR (100 MHz,  $\text{CDCl}_3$ ):  $\delta$  =160.6, 134.5, 114.3, 113.4, 90.0, 88.3, 86.1, 73.2, 55.5, -0.20ppm.

[4-(4-Fluoro-phenyl)-buta-1,3-diynyl]-trimethyl-silane (**3fi**)<sup>[13]</sup>: Eluent: hexane; pale yellow solid; yield: 0.079 g (72%).  $^1\text{H}$  NMR (400 MHz,  $\text{CDCl}_3$ ):  $\delta$  = 7.49-7.45 (m, 2H), 7.03-6.99 (m, 2H), 0.23 (s, 9H) ppm.  $^{13}\text{C}\{^1\text{H}\}$  NMR (100 MHz,  $\text{CDCl}_3$ ):  $\delta$  =163.2(d,  $J$  = 250 Hz), 134.9 (d,  $J$  = 8.5Hz), 116.1, 115.9, 90.9, 87.7, 86.1, 75.8, -0.26ppm.

[4-(4-trifluoromethyl-phenyl)-buta-1,3-diynyl]-trimethyl-silane (**3fi**)<sup>[15]</sup>: Eluent: hexane; pale yellow solid; yield: 0.087 g (67%).  $^1\text{H}$  NMR (400 MHz,  $\text{CDCl}_3$ ):  $\delta$  = 7.64-7.62 (m, 1H), 7.60-7.58 (m, 3H), 0.25 (s, 9H) ppm.  $^{13}\text{C}\{^1\text{H}\}$  NMR (100 MHz,  $\text{CDCl}_3$ ):  $\delta$  =133.1, 131.1(d,  $J$  = 32.6Hz), 125.5(q,  $J$  = 75.5Hz), 125.2, 122.5, 92.6, 87.4, 76.5, 75.1, -0.23ppm.

(4-naphthalen-2-yl-buta-1,3-diynyl)-trimethyl-silane (**3fq**)<sup>[16]</sup>: Eluent: hexane; pale yellow solid; yield: 0.092 g (74%).  $^1\text{H}$  NMR (400 MHz,  $\text{CDCl}_3$ ):  $\delta$  = 8.03 (s, 1H), 7.79-7.75 (m, 3H), 7.51-7.48 (m, 3H), 0.25 (s, 9H) ppm.  $^{13}\text{C}\{^1\text{H}\}$  NMR (100 MHz,  $\text{CDCl}_3$ ):  $\delta$  =133.4, 133.3, 132.8, 129.6, 128.3, 127.97, 127.94, 127.4, 126.9, 118.7, 91.0, 88.0, 76.8, 74.5, -0.22ppm.

## V. References

1. (a) H. -L. Li, L. -L. Wang, M. Yang, Y. -X. Qi, *Catal. Commun.* 2012, **17**, 179; (b) D. Saha, T. Chatterjee, M. Mukherjee, B. C. Ranu, *J. Org. Chem.* 2012, **77**, 9379; (c) S.-H. Wang, L. Yu, P. -H. Li, L. -G. Meng, L. Wang, *Synthesis* 2011, **10**, 1541; (d) W. Shi, Y. -D. Luo, X. -C. Luo, L. Chao, H. Zhang, J. Wang, A. -W. Lei, *J. Am. Chem. Soc.*, 2008, **130**, 14713.
2. (a) H. Hofmeister, K. Annen, H. Laurent, R. Weichert, *Angew. Chem., Int. Ed.* 1984, **23**, 727; (b) Y. -H. Liu, Z. -Q. Zhong, K. Nakajima, T. Takahashi, *J. Org. Chem.* 2002, **67**, 7451.
3. (a) D. B. Biradar, H. -M. Gau, *Chem. Commun.*, 2011, **47**, 10467; (b) W. -T. Shu, S. -L. Zhou, H. -M. Gau, *Synthesis* 2009, **3**, 4075; (c) S. -L. Ku, X. -P. Hui, C. -A. Chen, Y. -Y. Kuo, H. -M. Gau, *Chem. Commun.*, 2007, **37**, 3847; (d) D. B. Biradar, H. -M. Gau, *Org. Biomol. Chem.*, 2012, **10**, 4243; (e) B. -M. Wang, M. Bonin, L. Micouin, *Org. Lett.*, 2004, **6**, 3481.
4. D. Saha, T. Chatterjee, M. Mukherjee, B. C. Ranu, *J. Org. Chem.*, 2012, **77**, 9379.
5. M. Nasr-Esfahani, I. Mohammadpoor-Baltork, A. R. Khosropour, M. Moghadam, V. Mirkhani, S. Tangestaninejad, V. Agabekov, H. A. Rudbaria, *RSC Adv.*, 2014, **4**, 14291.
6. J. -P. Wan, S. Cao, Y. -F. Jing, *Appl. Organometal. Chem.*, 2014, **28**, 631.
7. Z. -Y. Ma, X. -Y. Wang, S. -Y. Wei, H. -L. Yang, F. -W. Zhang, P. Wang, M. Xie, J. -T. Ma, *Cata. Commun.*, 2013, **39**, 24.
8. S. Ahammed, D. Kundu, B. C. Ranu, *J. Org. Chem.*, 2014, **79**, 7391.
9. Z. -W. Chen, H.-F. Jiang, A. -Z. Wang, S. -R. Yang, *J. Org. Chem.*, 2010, **75**, 6700.
10. Y. -S. Liu, P. Liu, N. -N. Gu, J. -W. Xie, Y. Liu, B. Dai, *Chin. J. Chem.*, 2016, **34**, 1.
11. K. Fang, M. H. Xie, Z. N. Zhang, P. Ning, G. Y. Shu, *Tetrahedron Lett.* 2013, **54**, 3819.
12. L. Li, J. -L. Zhang, *RSC Advance.*, 2015, **5**, 78090.
13. Y. -X. Xue, Y. -Y. Zhu, L. -M. Gao, X. -Y. He, Na. Liu, W. -Y. Zhang, J. Yin, Y. -S. Ding, H. -P. Zhou, Z. -Q. Wu, *J. Am. Chem. Soc.*, 2014, **136**, 4706.
14. E. R. Graham, R. R. Tykwinski, *J. Org. Chem.*, 2011, **76**, 6574.
15. N. Gulia, B. Pigulski, M. Charewicz, S. Szafert, *Chem. - A Eur.*, 2014, **20**, 2746.
16. J. Zheng, Q. -Y. Chen, K. Sun, Y. -G. Huang, Y. Guo, *Tetrahedron Letters*, 2016, **57**, 5757.

## V. <sup>1</sup>H and <sup>13</sup>C NMR Spectra of Coupling Products

### <sup>1</sup>H NMR Spectrum of 1-methyl-4-(4-phenylbuta-1,3-diynyl)benzene (**3aa**)

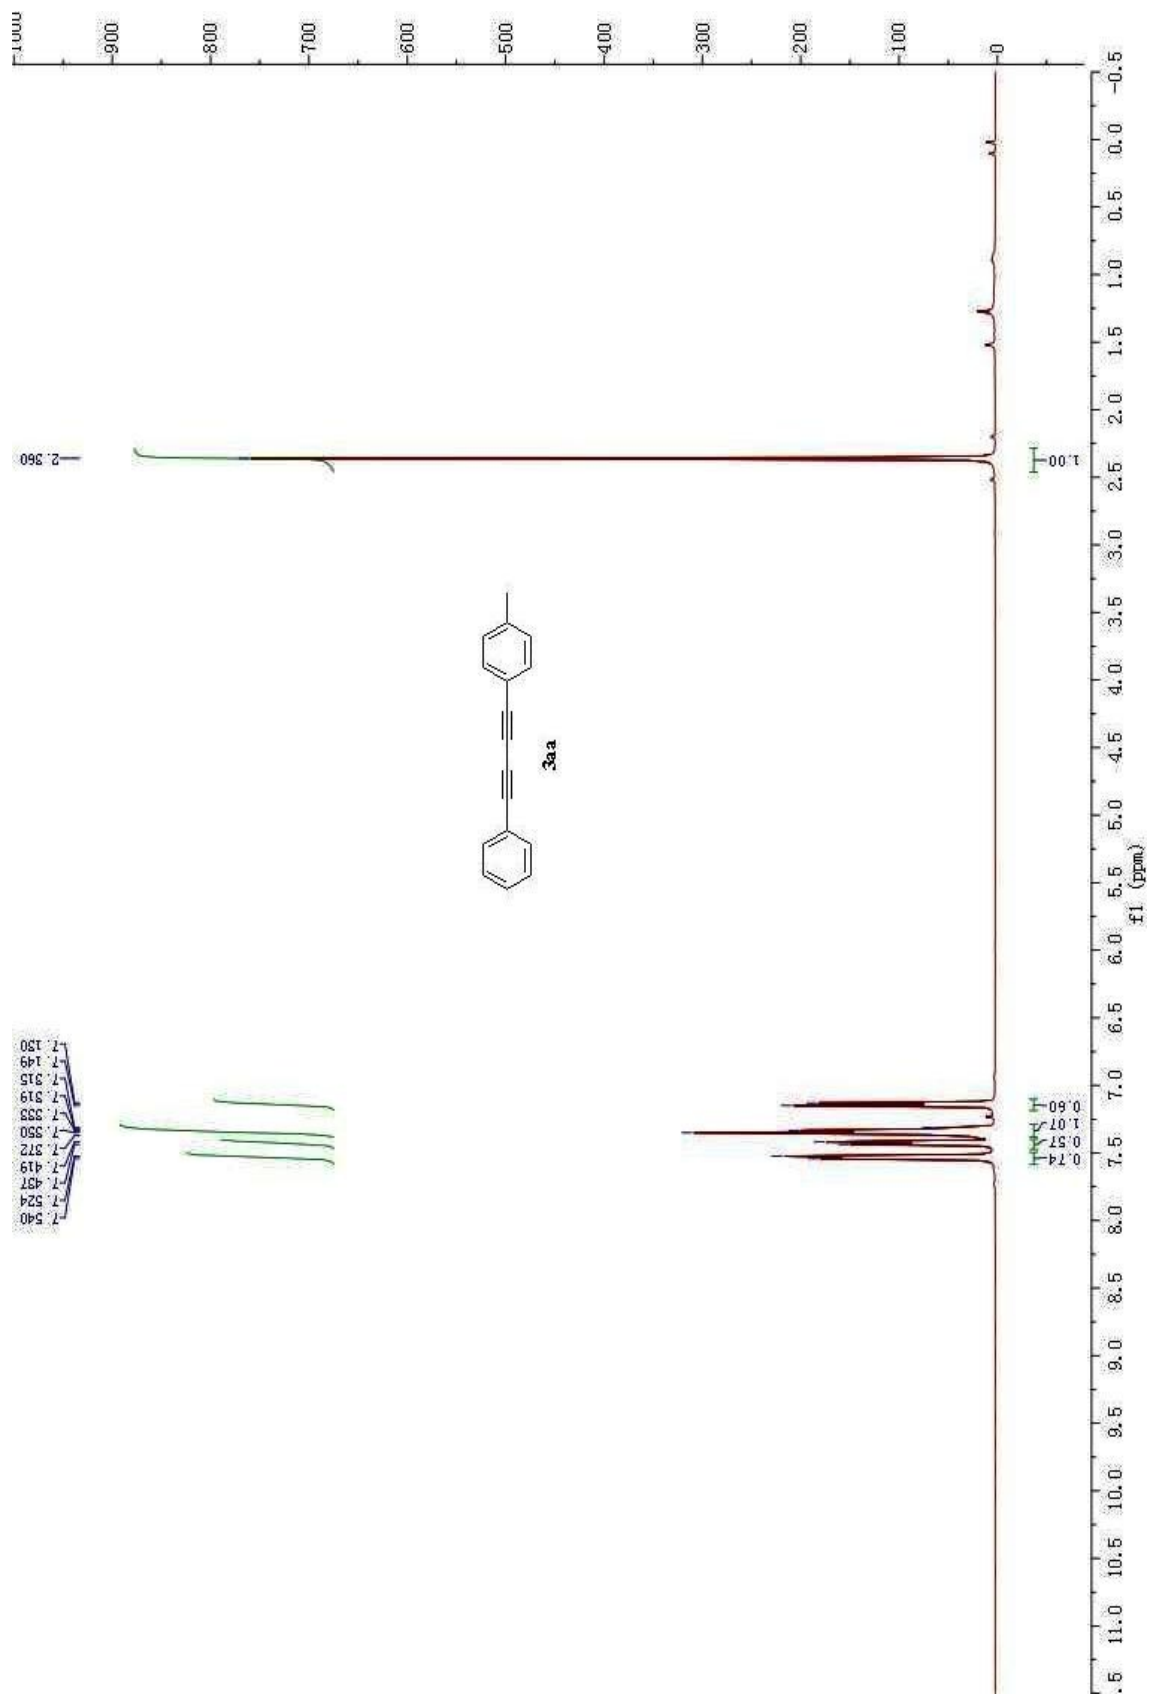

<sup>13</sup>C NMR Spectrum of 1-methyl-4-(4-phenylbuta-1,3-diynyl)benzene (**3aa**)

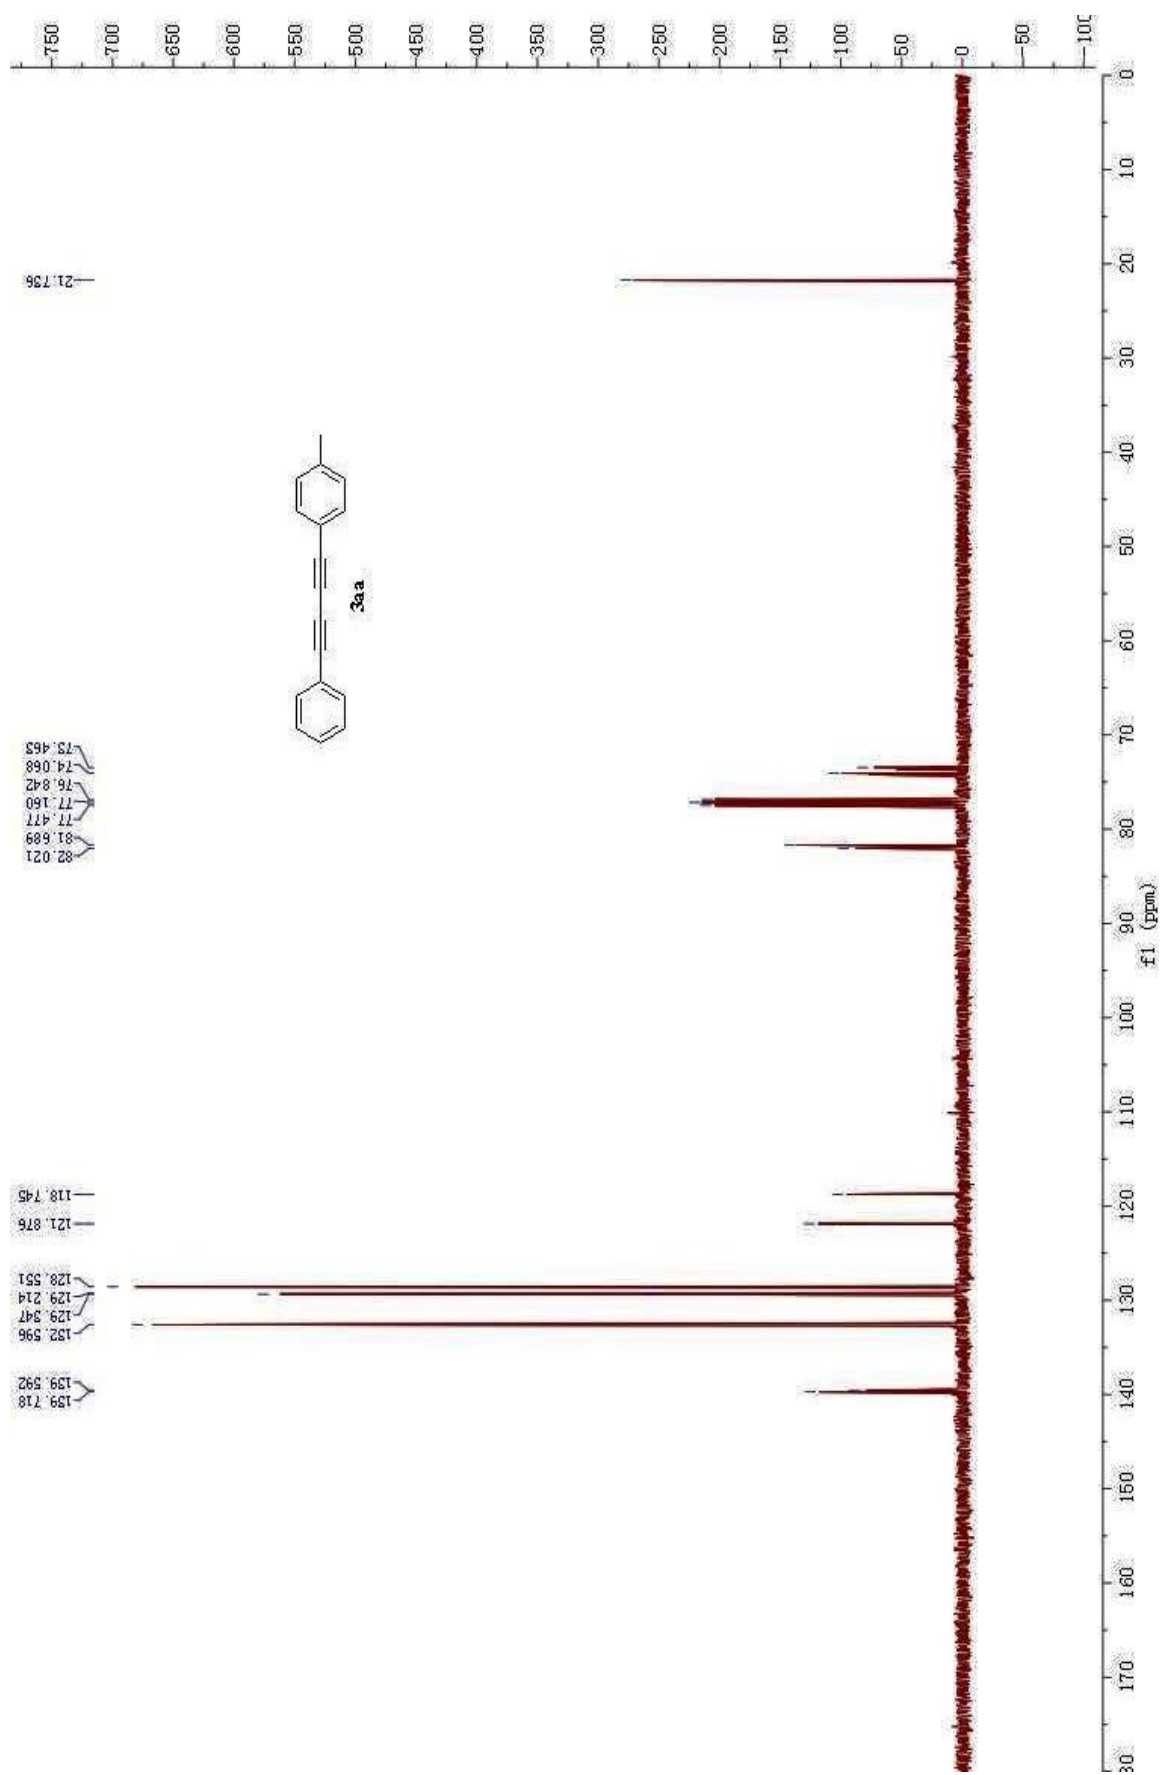

<sup>1</sup>H NMR Spectrum of 1-ethyl-4-(4-phenylbuta-1,3-diynyl)benzene (**3ab**)

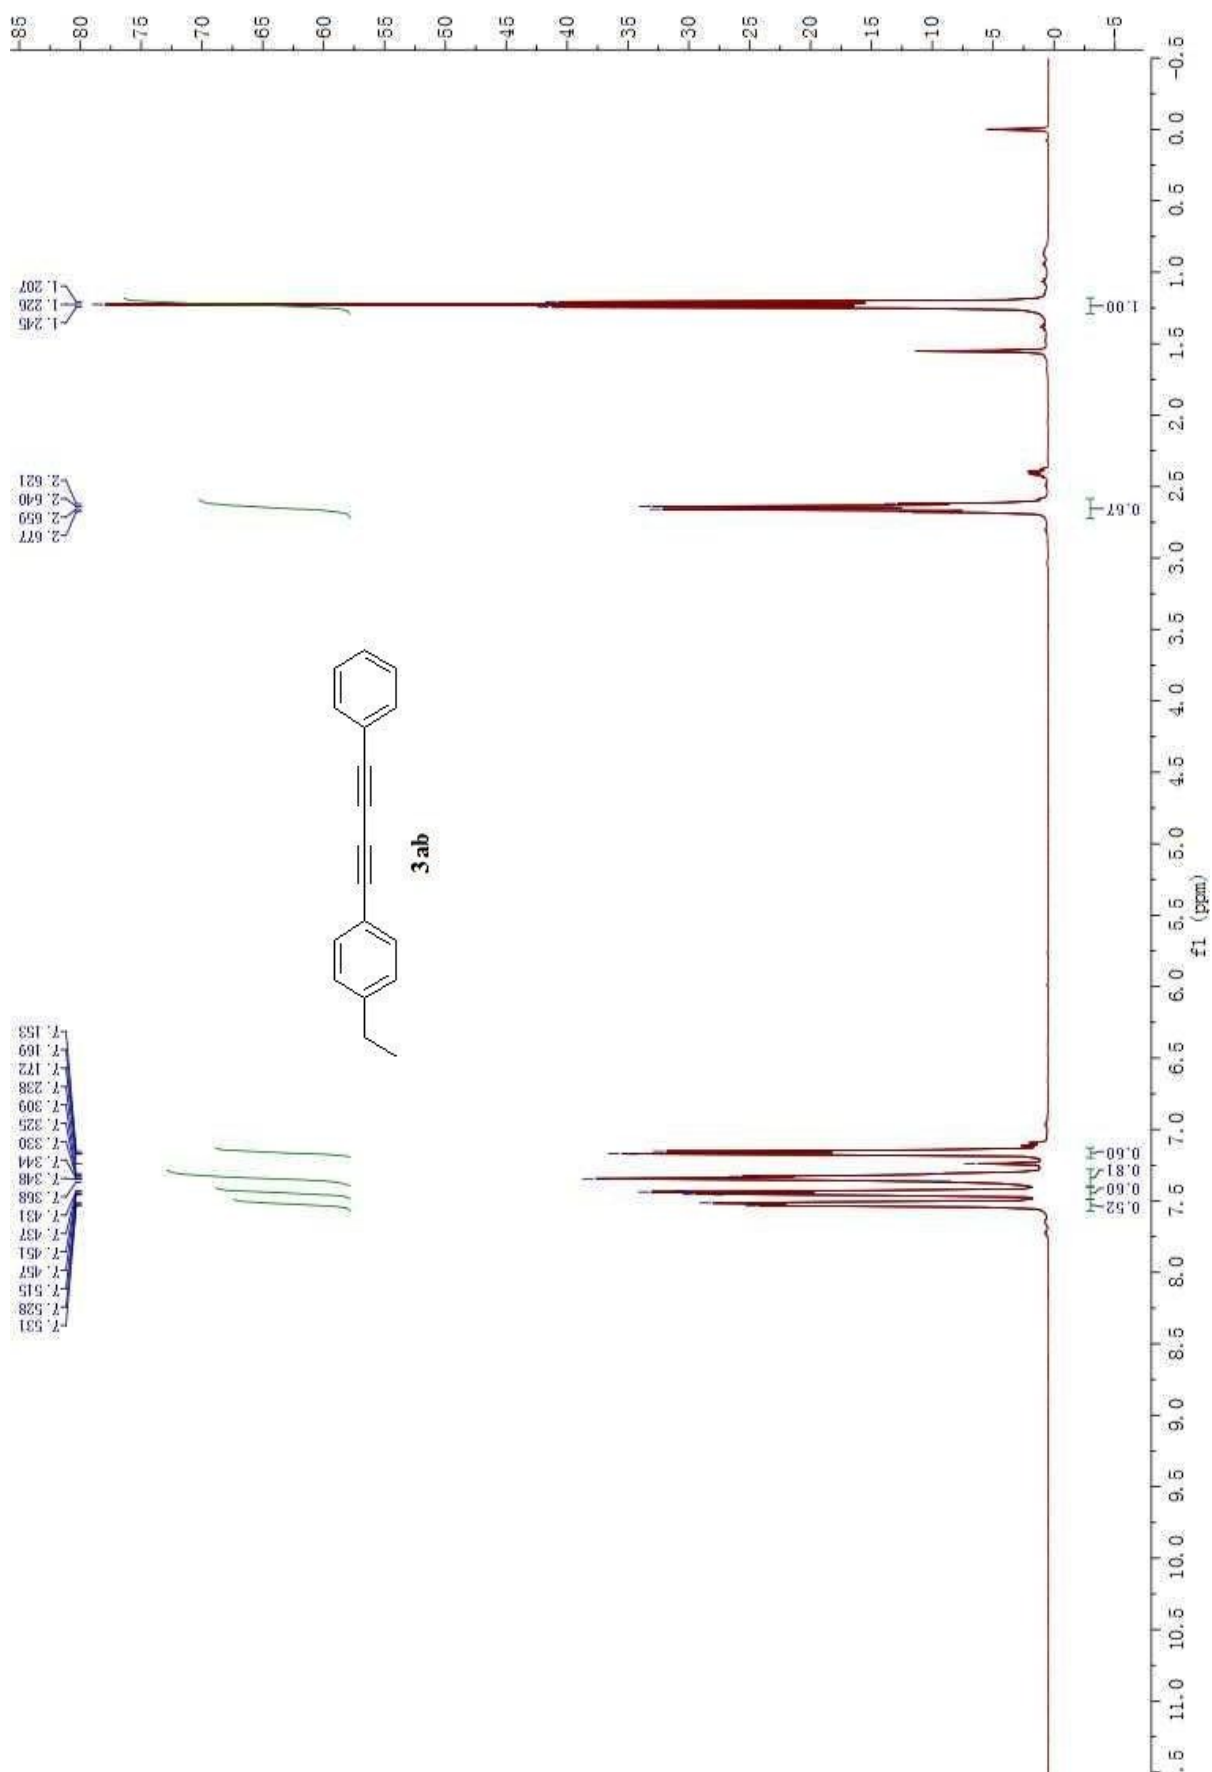



<sup>13</sup>C NMR Spectrum of 1-ethyl-4-(4-phenylbuta-1,3-diynyl)benzene (**3ab**)

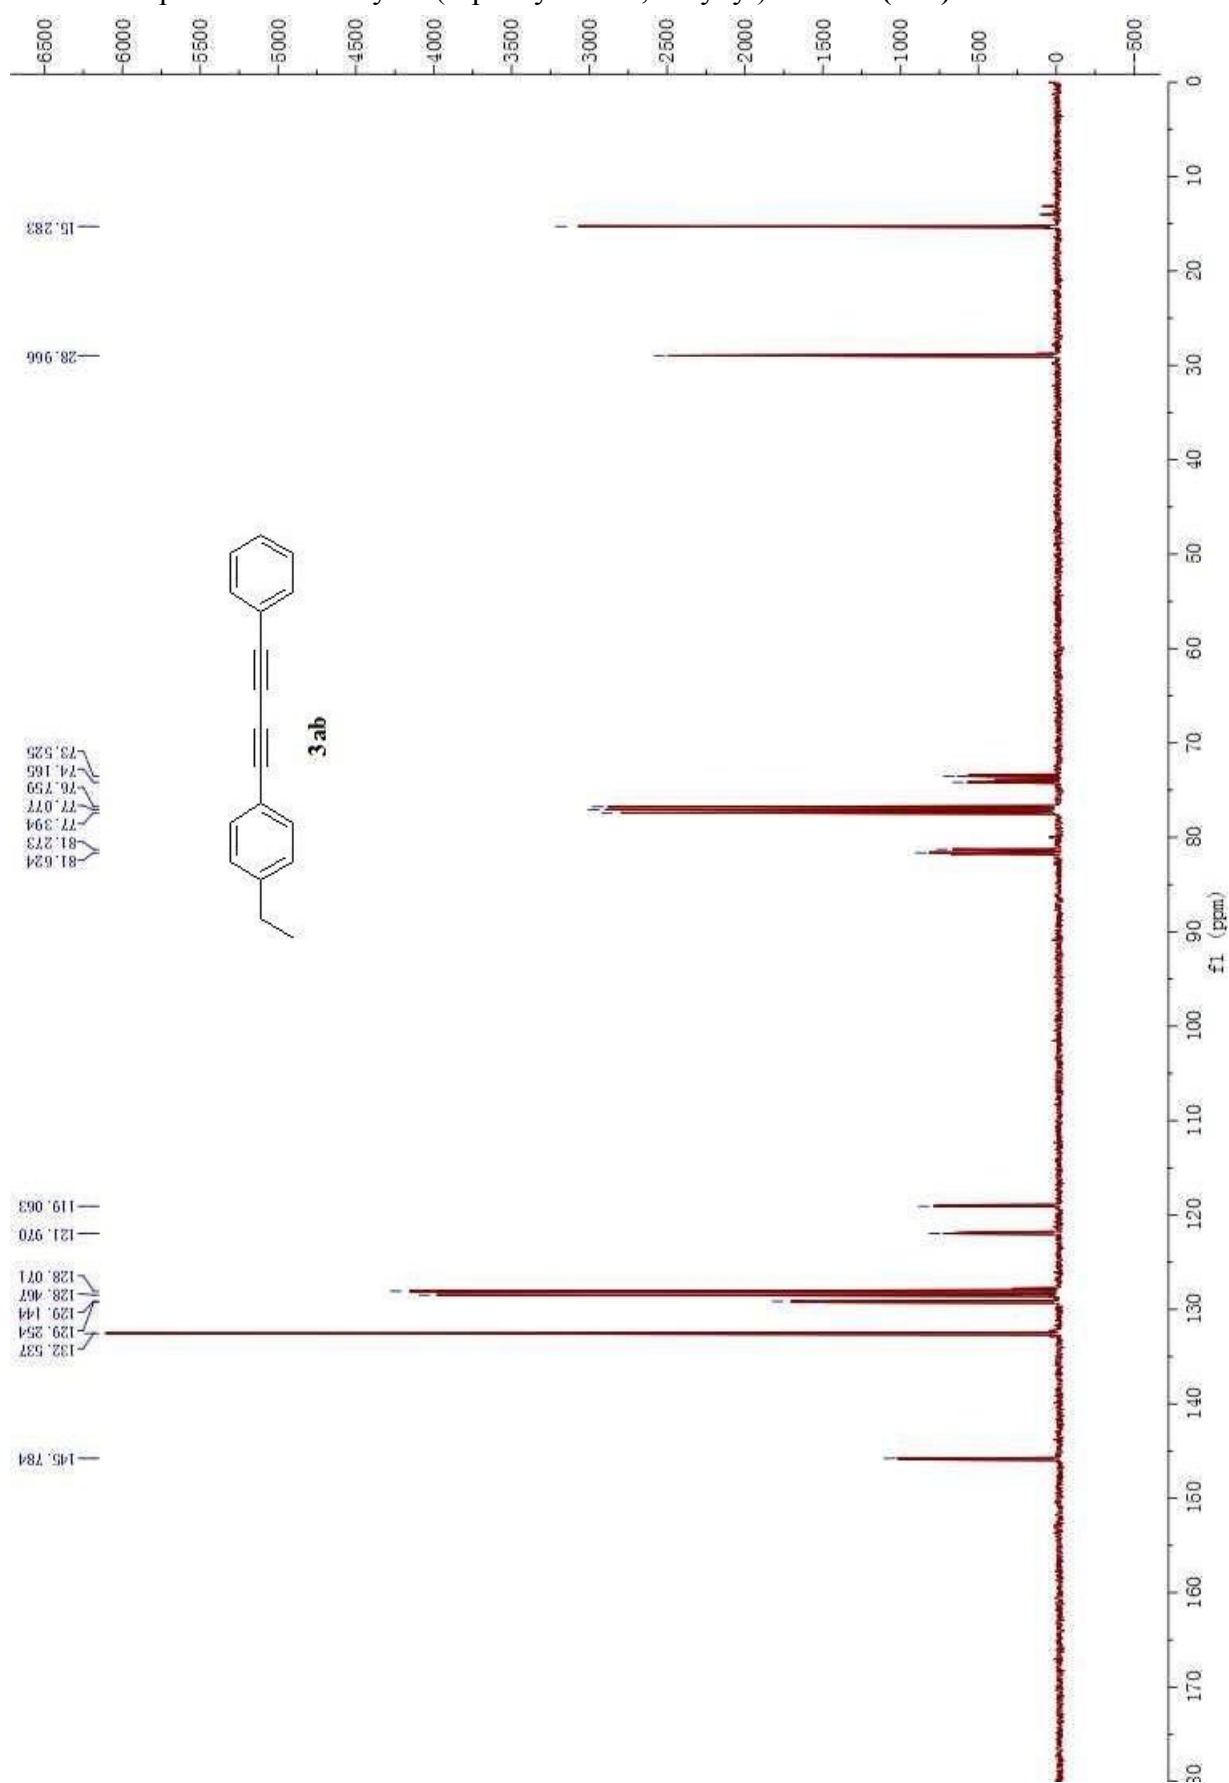

<sup>1</sup>H NMR Spectrum of 1-propyl-4-(4-phenylbuta-1,3-diyne)benzene (**3ac**)

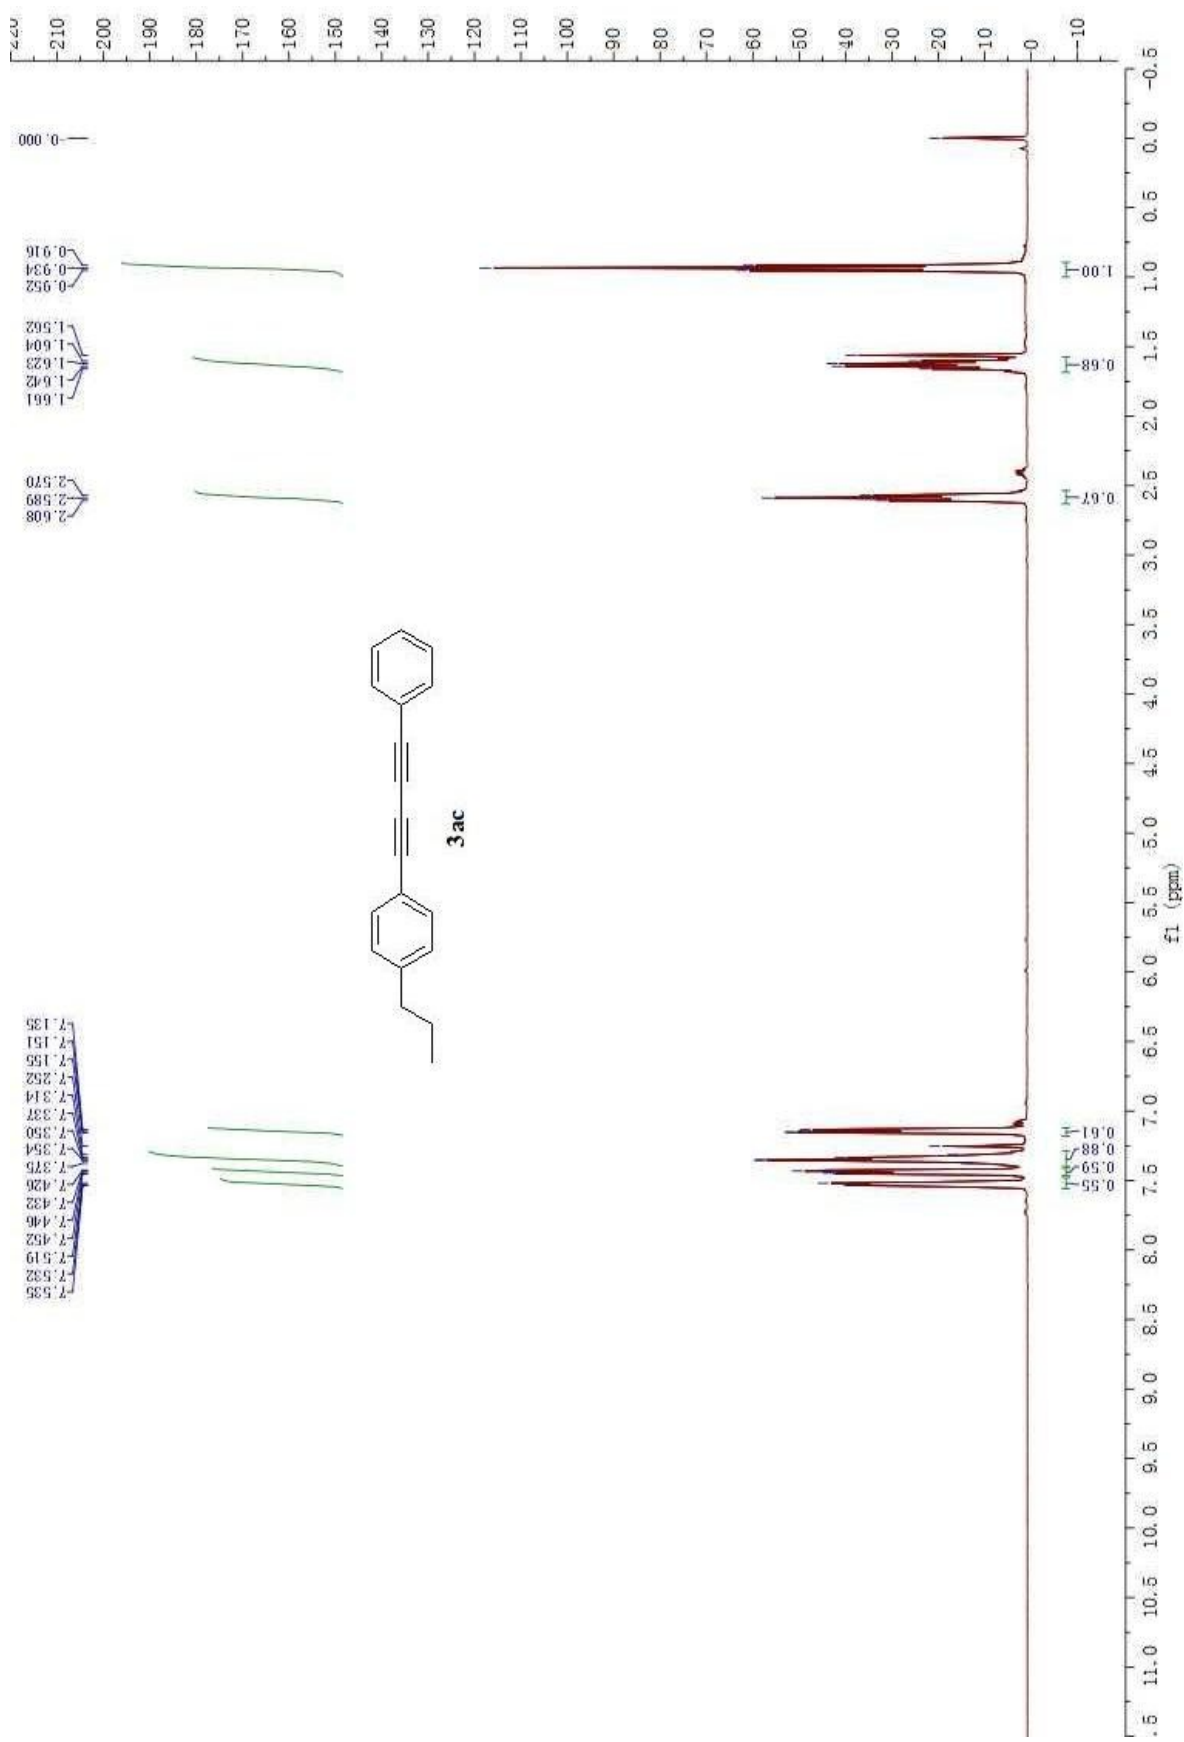

<sup>13</sup>C NMR Spectrum of 1-propyl-4-(4-phenylbuta-1,3-diyne)benzene (**3ac**)

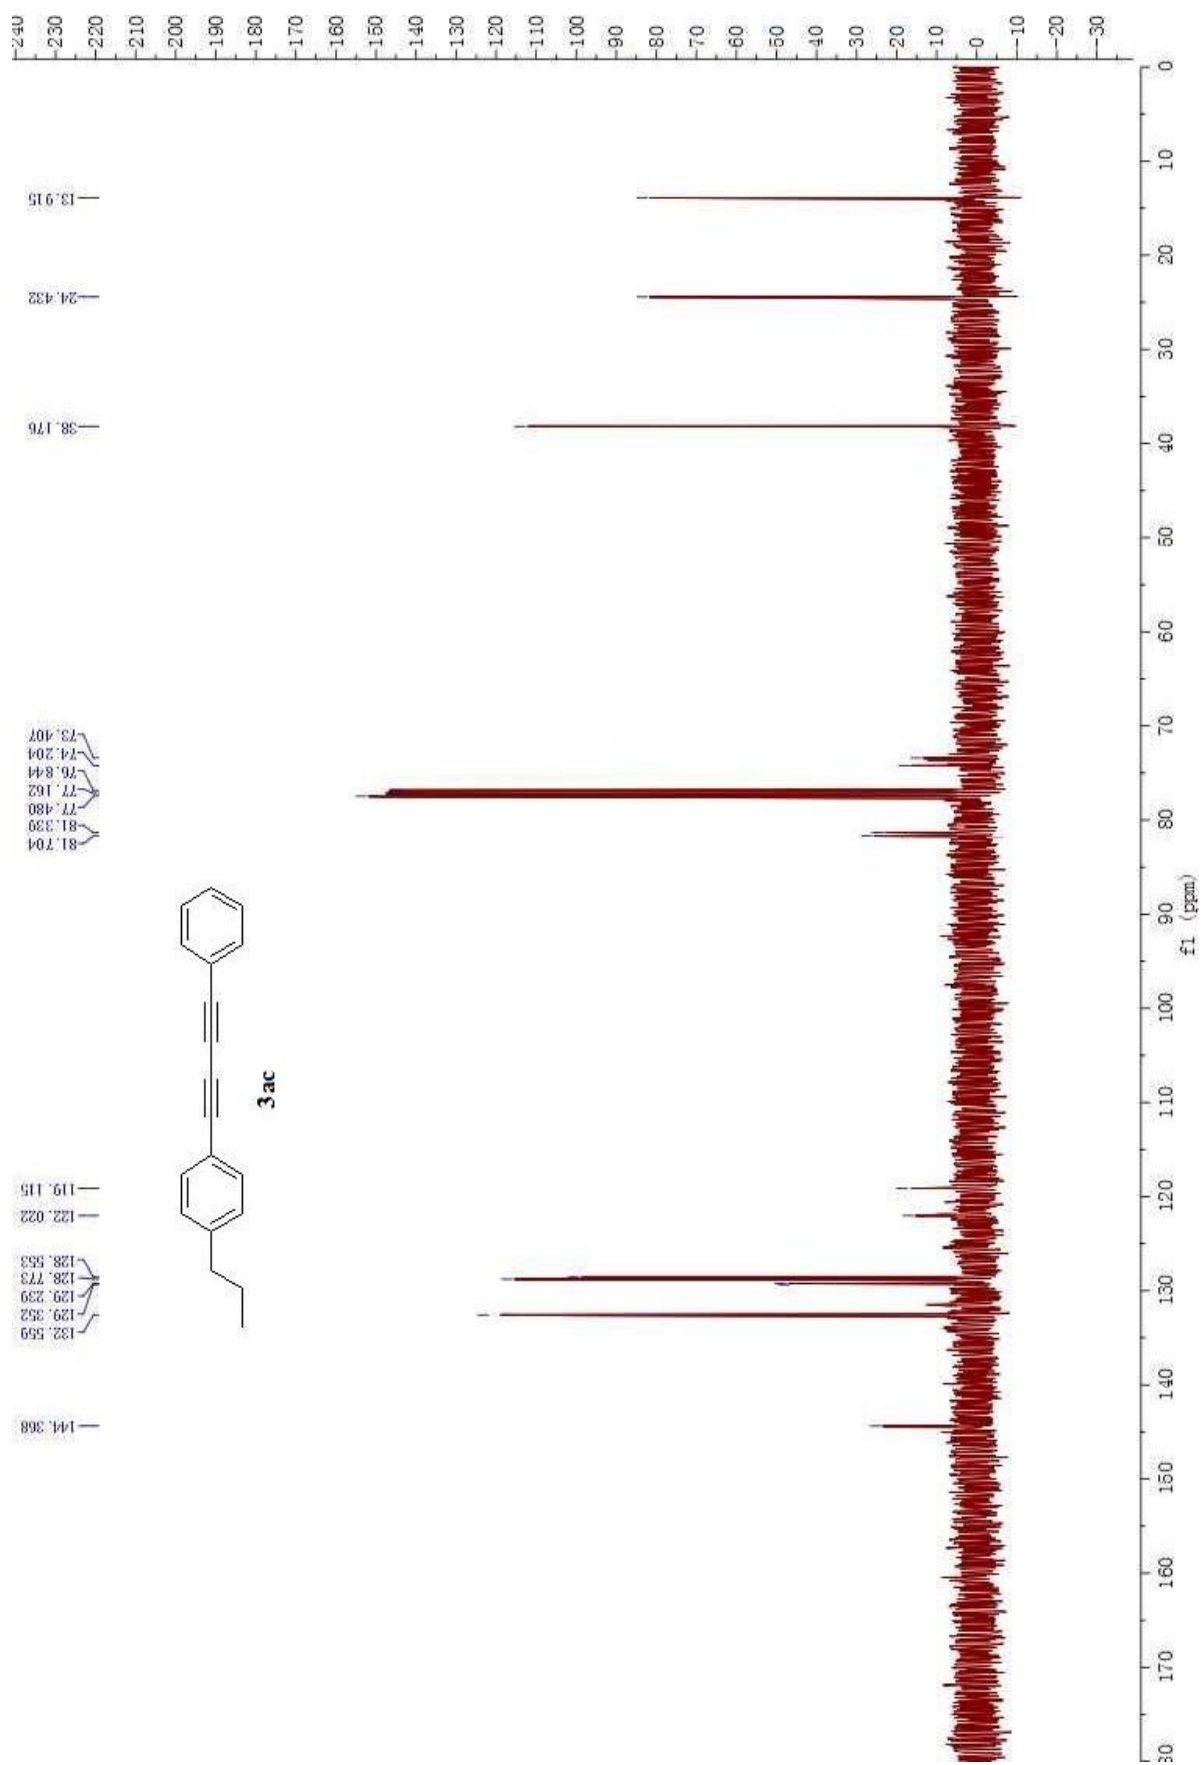

<sup>1</sup>H NMR Spectrum of 1-tert-butyl-4-(4-phenylbuta-1,3-diynyl)benzene (**3ad**)

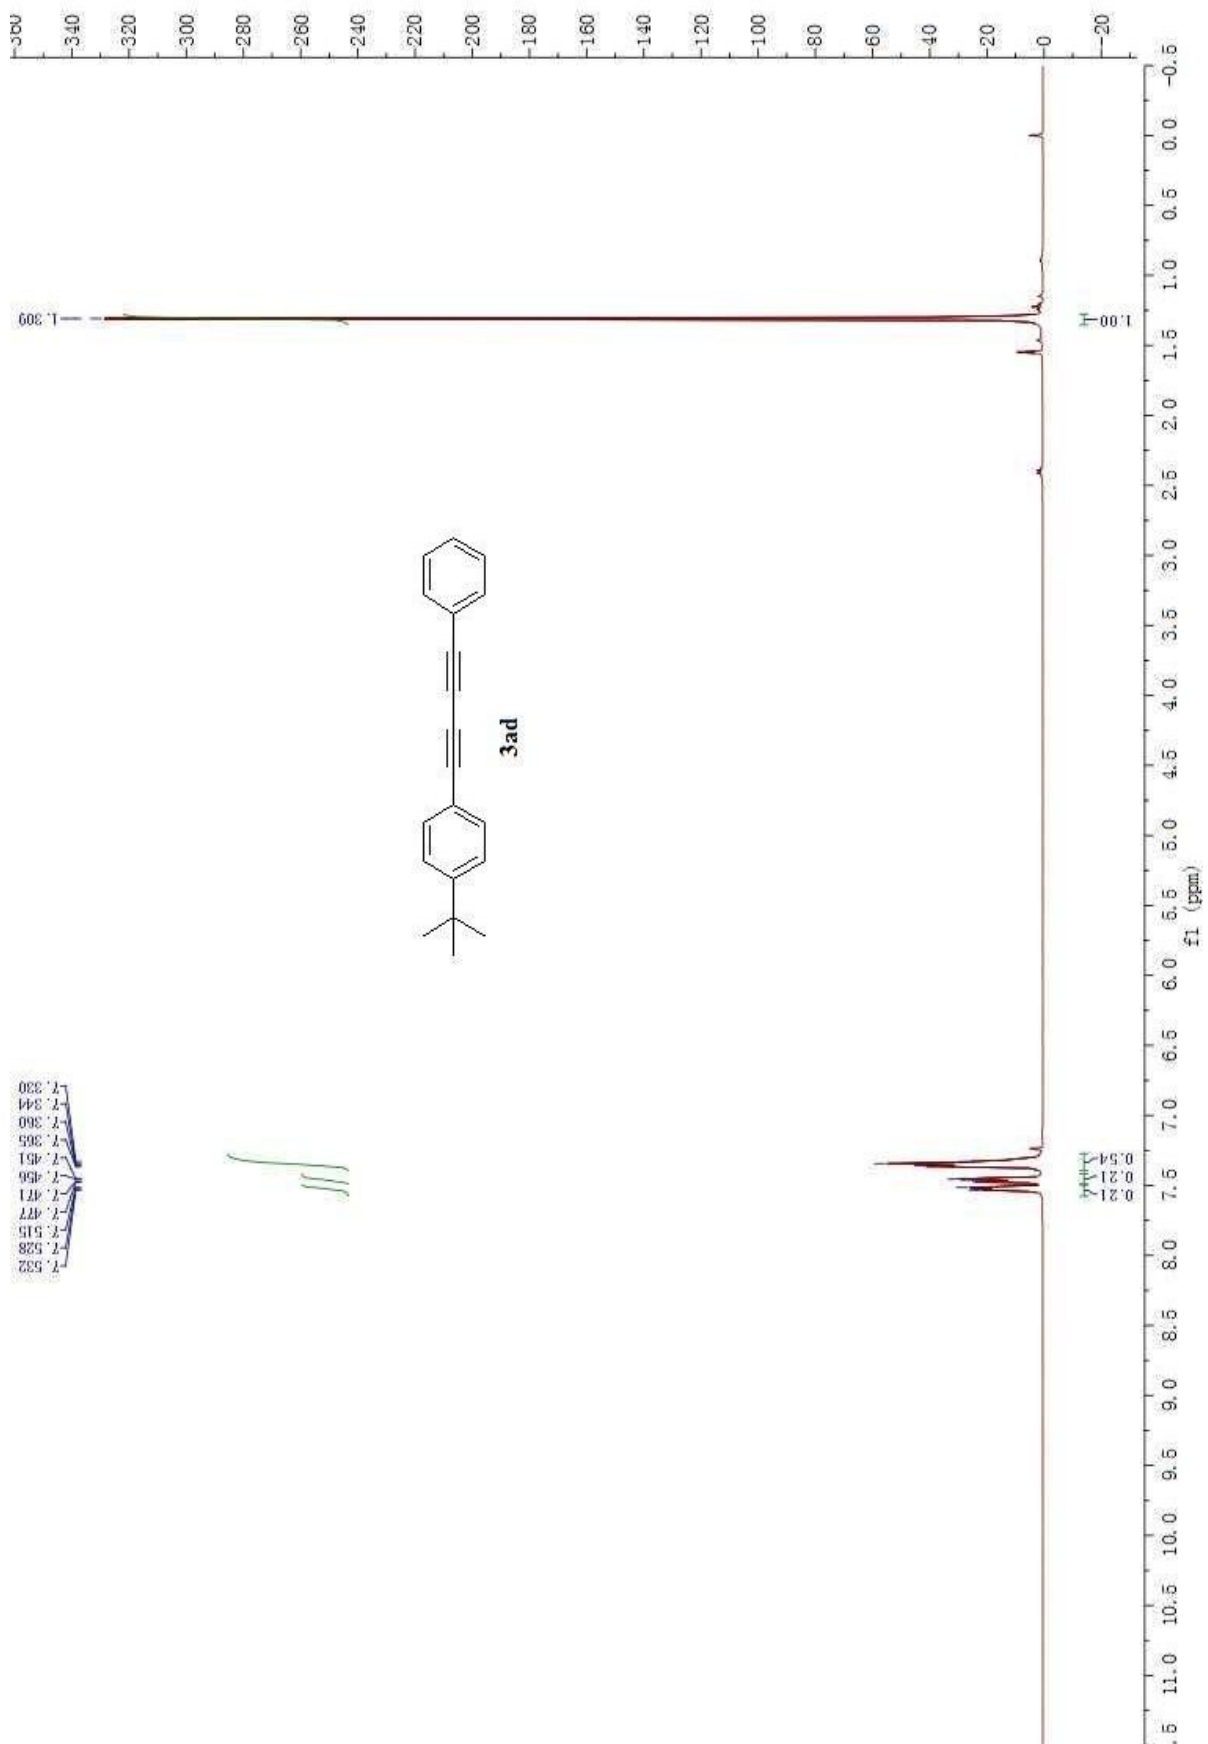

# <sup>13</sup>C NMR Spectrum of 1-propyl-4-(4-phenylbuta-1,3-diyne)benzene (**3ad**)

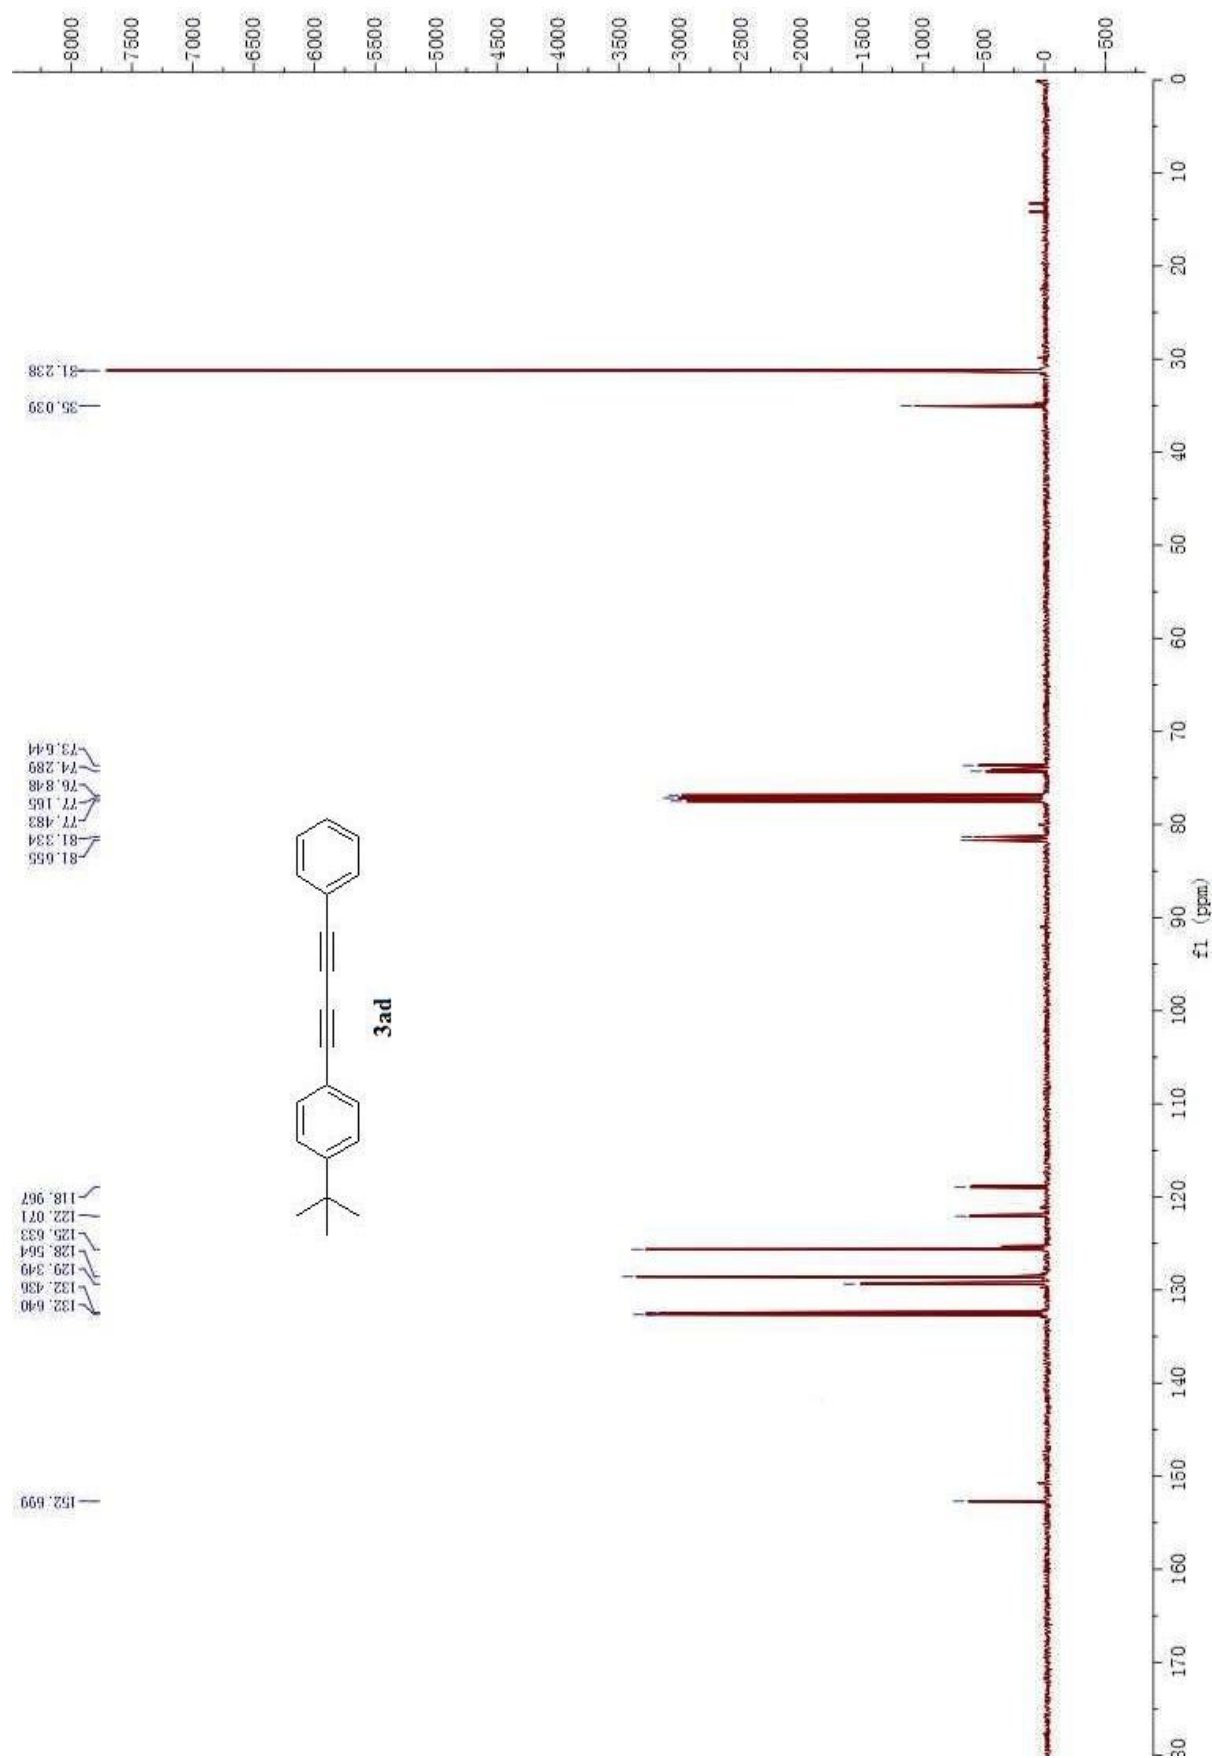

<sup>1</sup>H NMR Spectrum of 1-methyl-3-(4-phenylbuta-1,3-diyne)benzene (**3ae**)

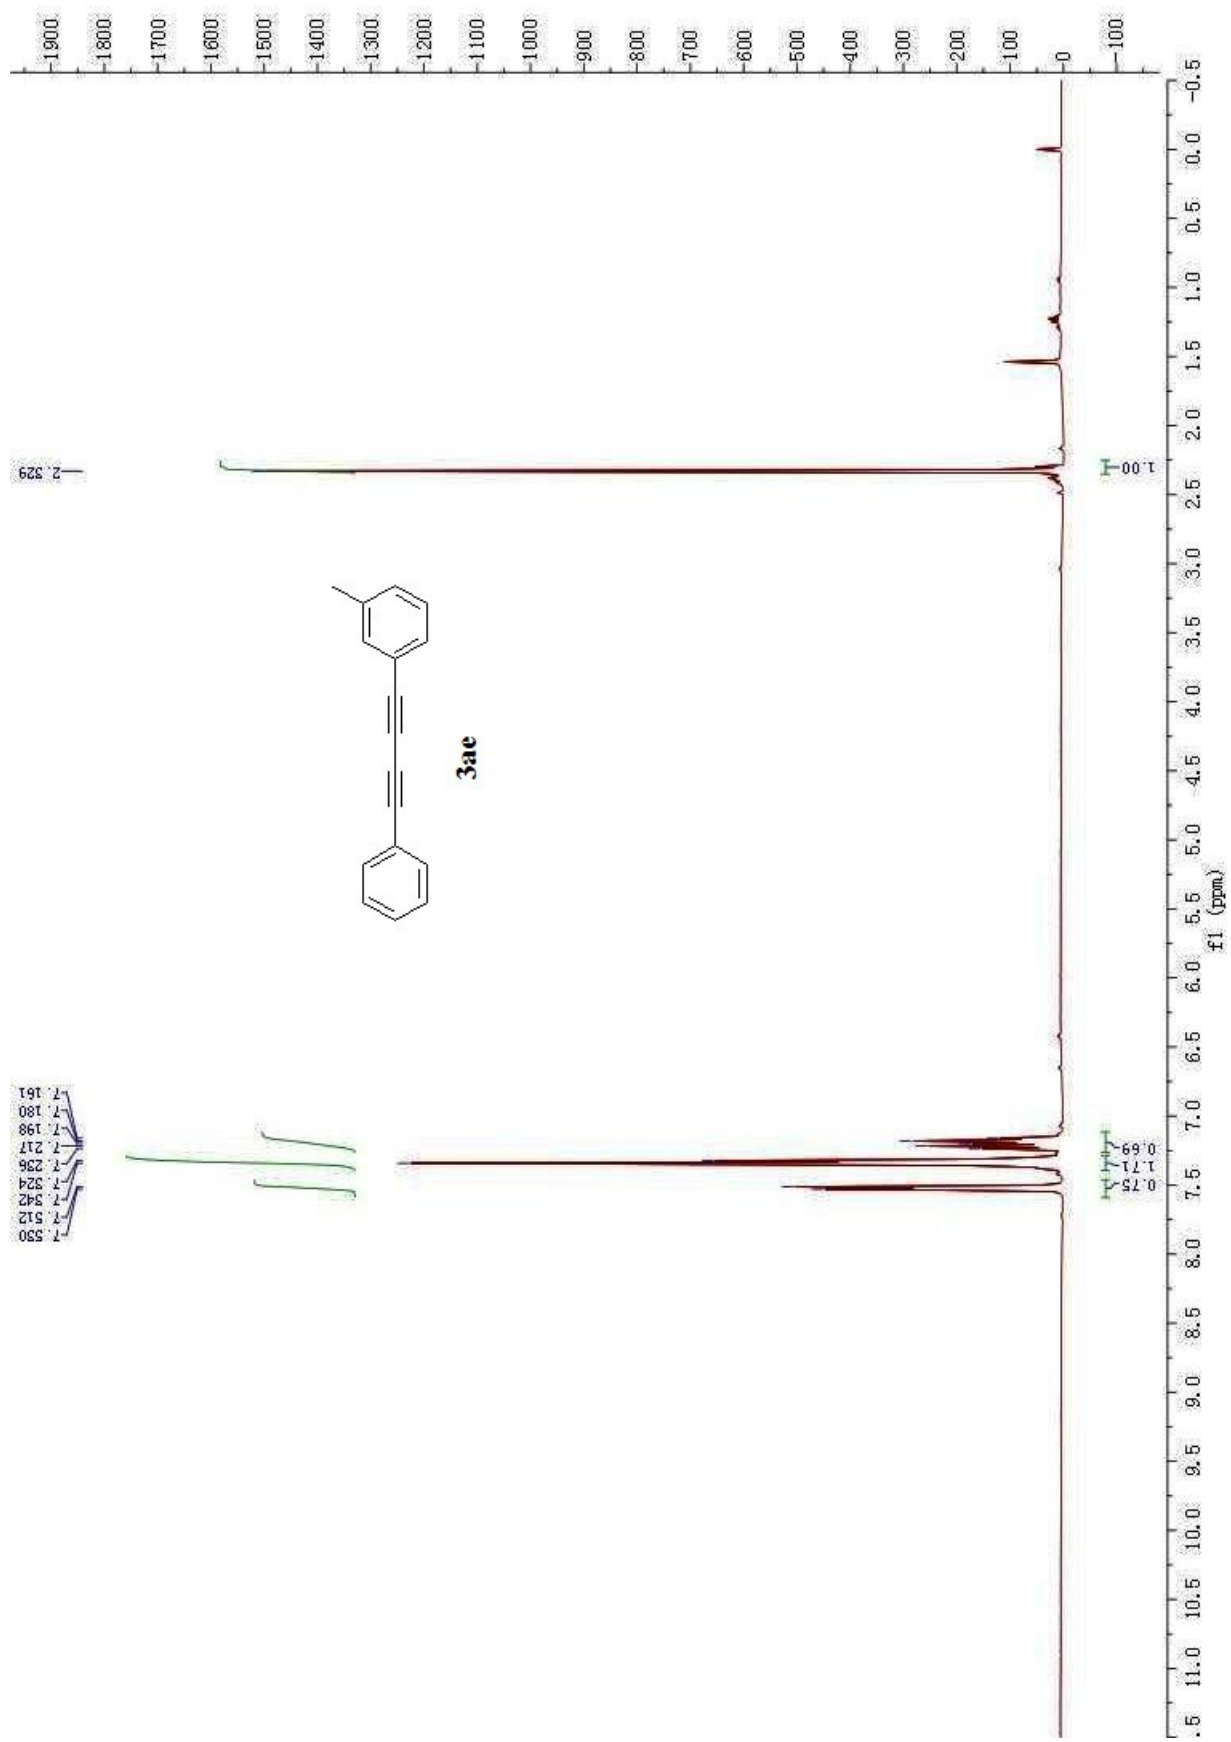

<sup>13</sup>C NMR Spectrum of 1-methyl-3-(4-phenylbuta-1,3-dienyl)benzene (**3ae**)

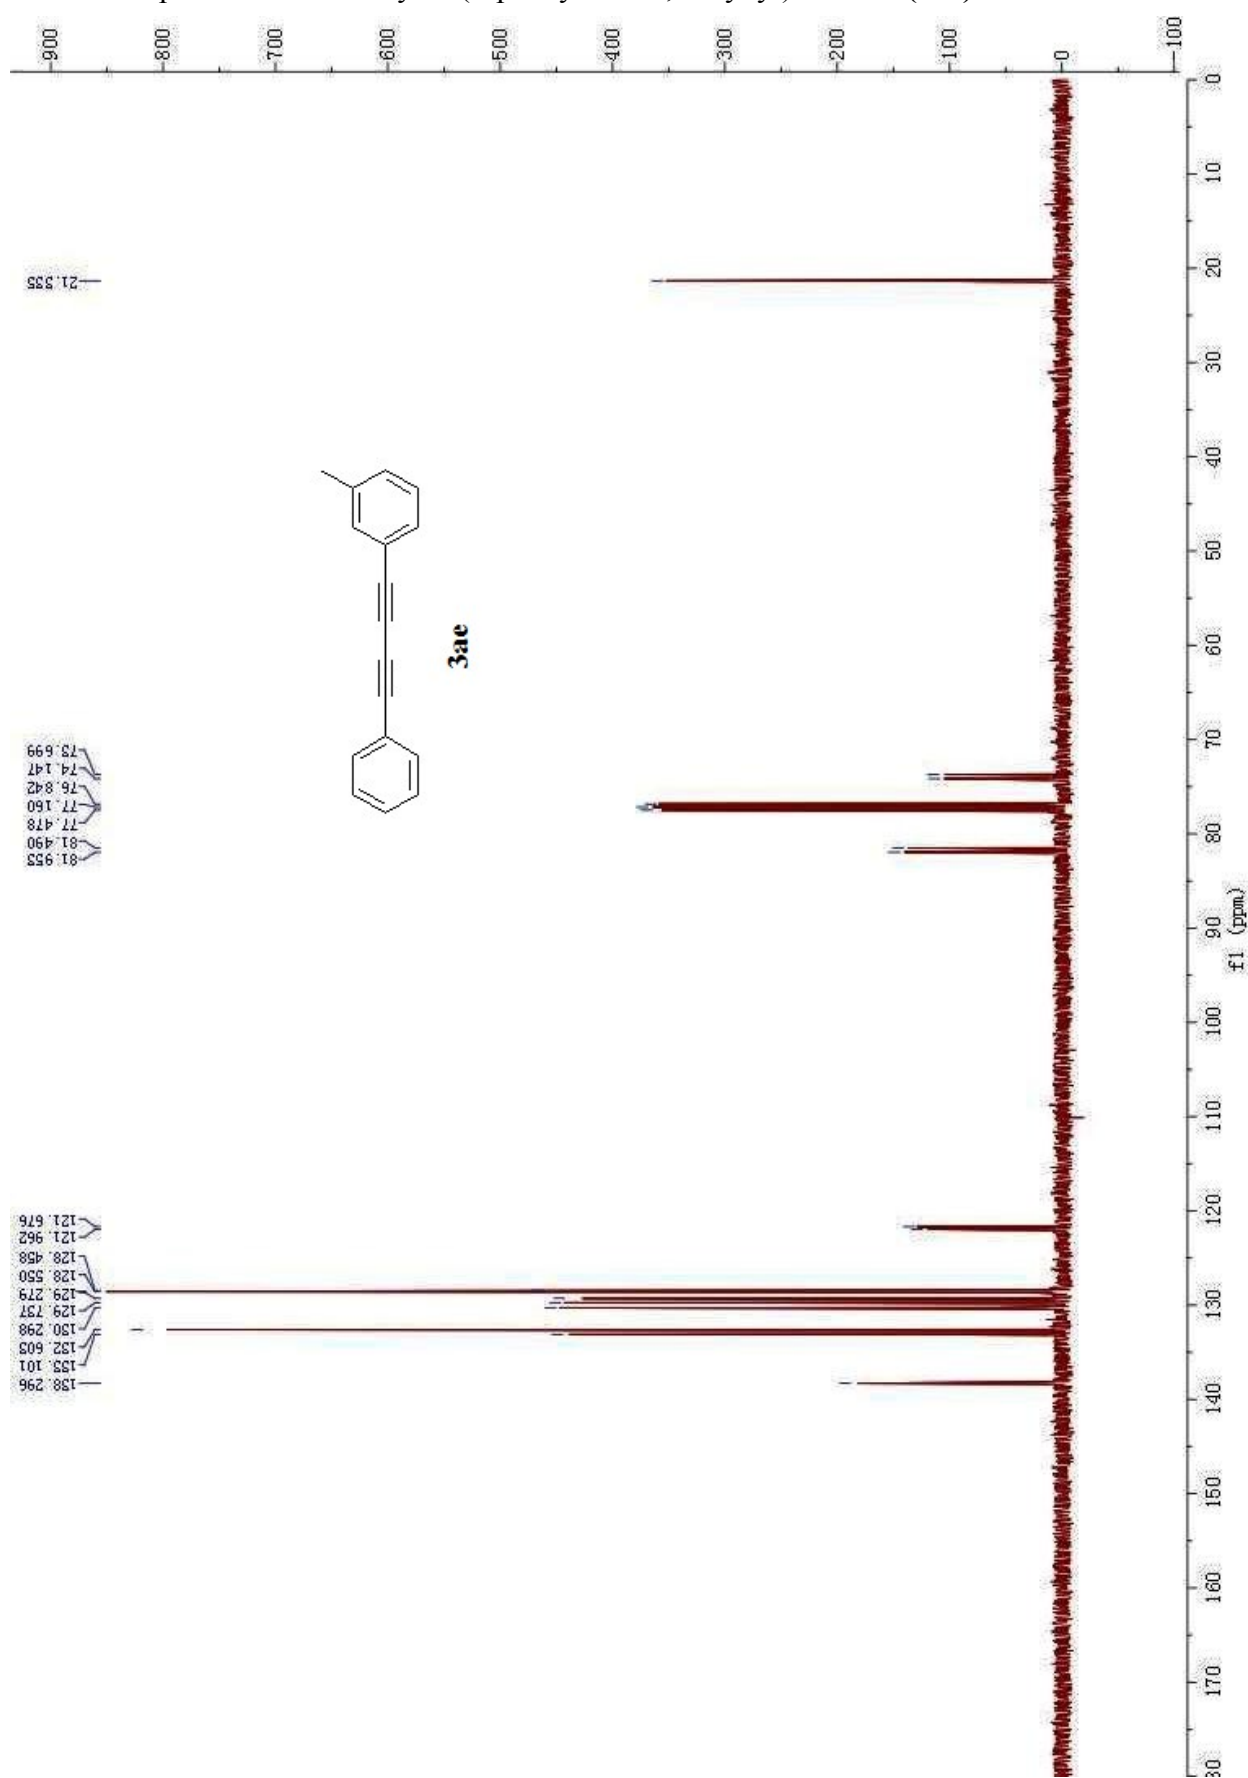

<sup>1</sup>H NMR Spectrum of 1-methoxy-4-(4-phenylbuta-1,3-diynyl)benzene (**3af**)

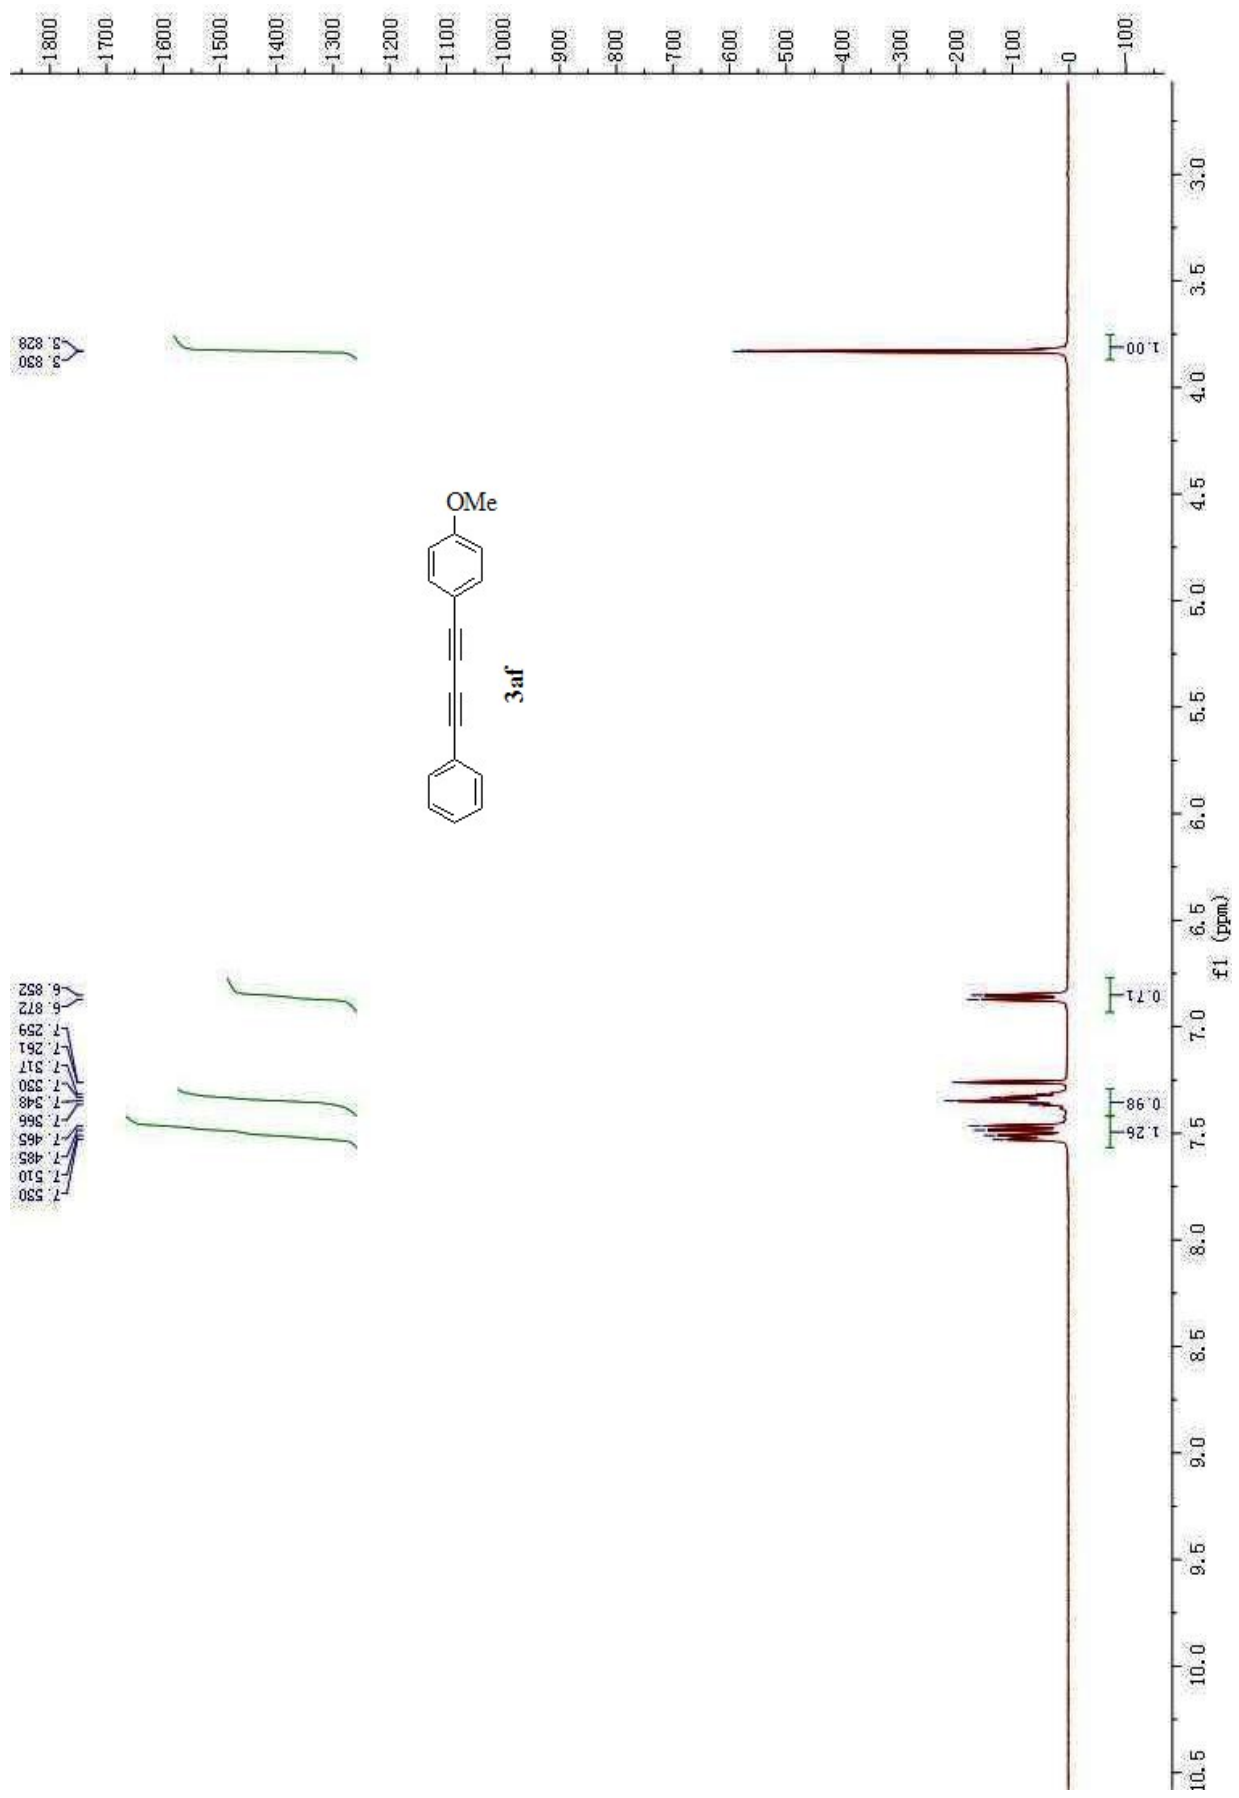



<sup>13</sup>C NMR Spectrum of 1-methoxy-4-(4-phenylbuta-1,3-dienyl)benzene (**3af**)

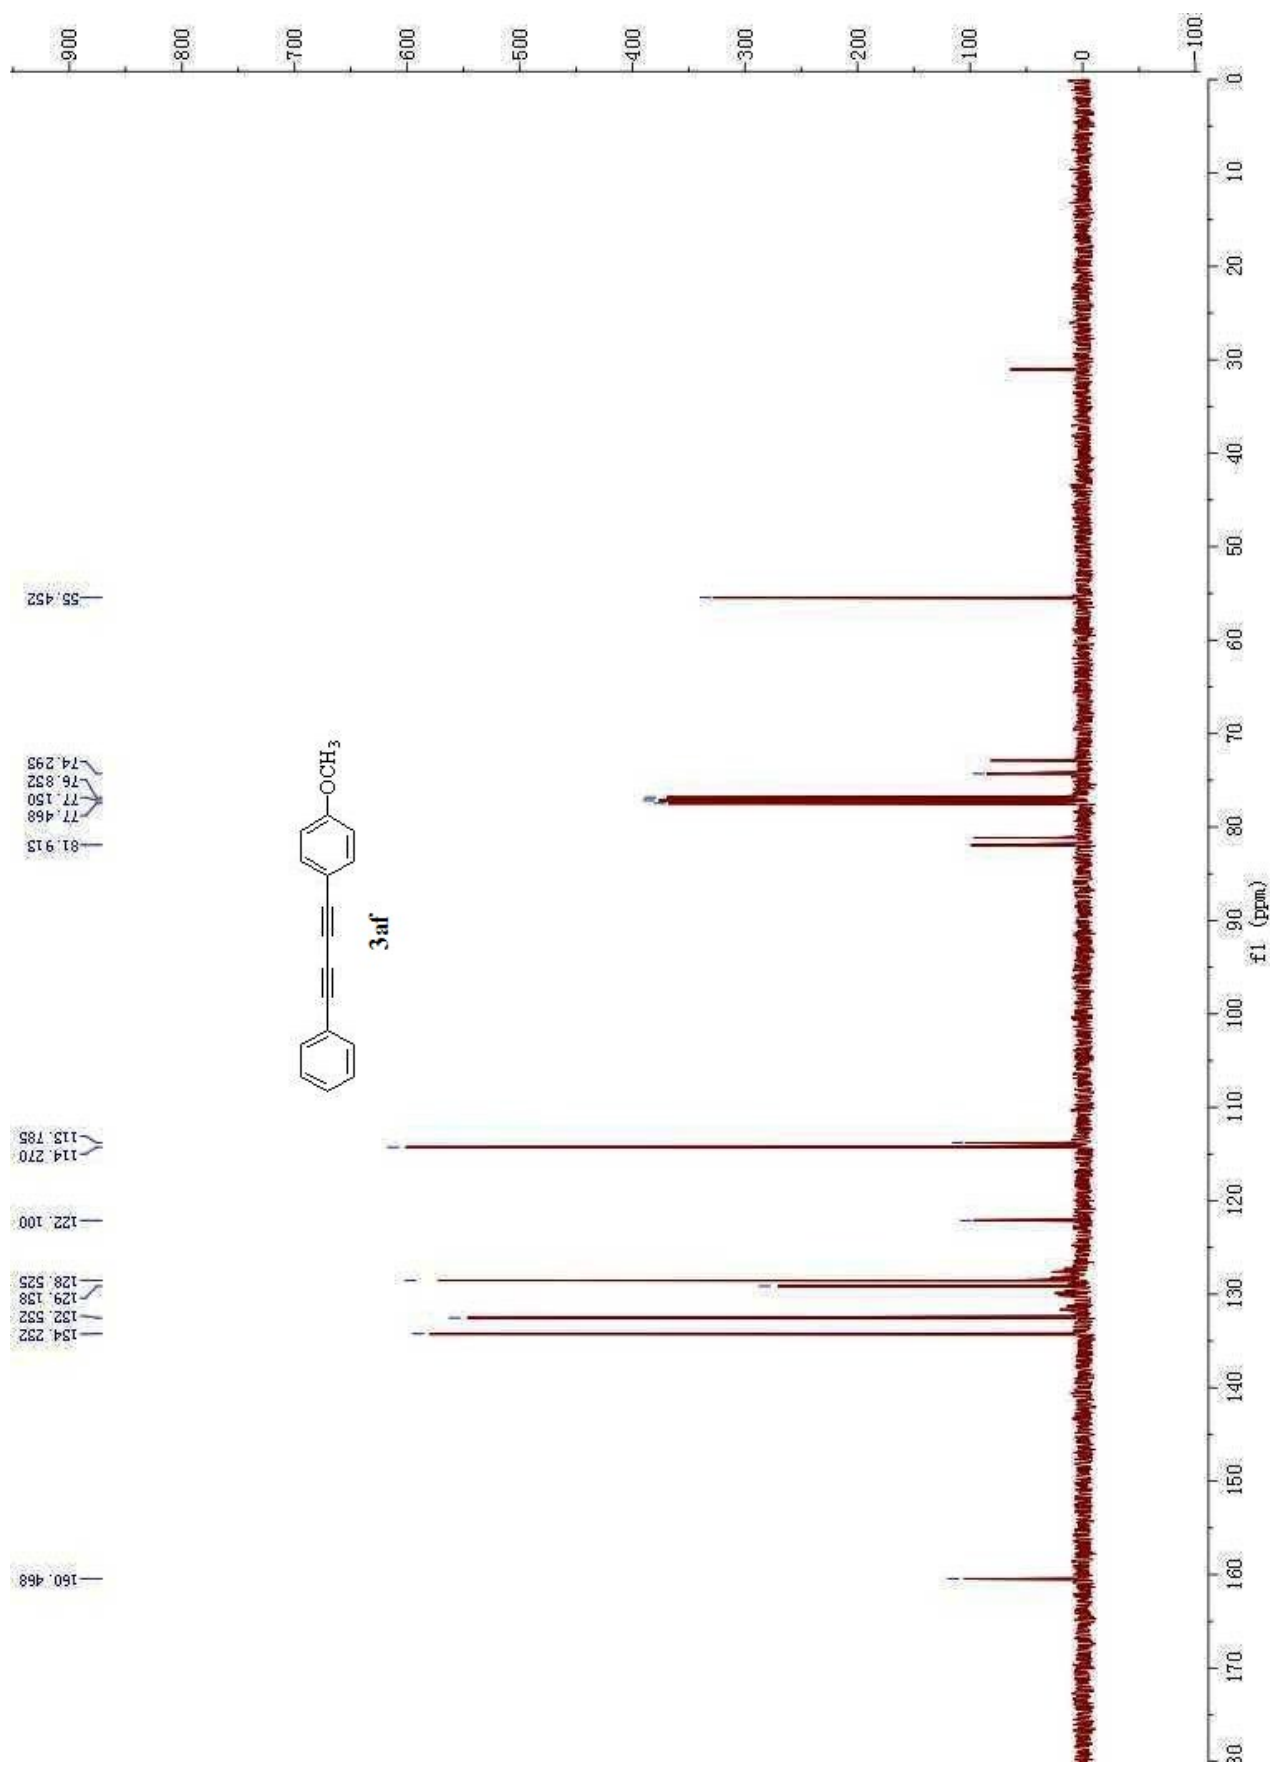

<sup>1</sup>H NMR Spectrum of 1-bromo-4-(4-phenylbuta-1,3-diynyl)benzene (**3ag**)

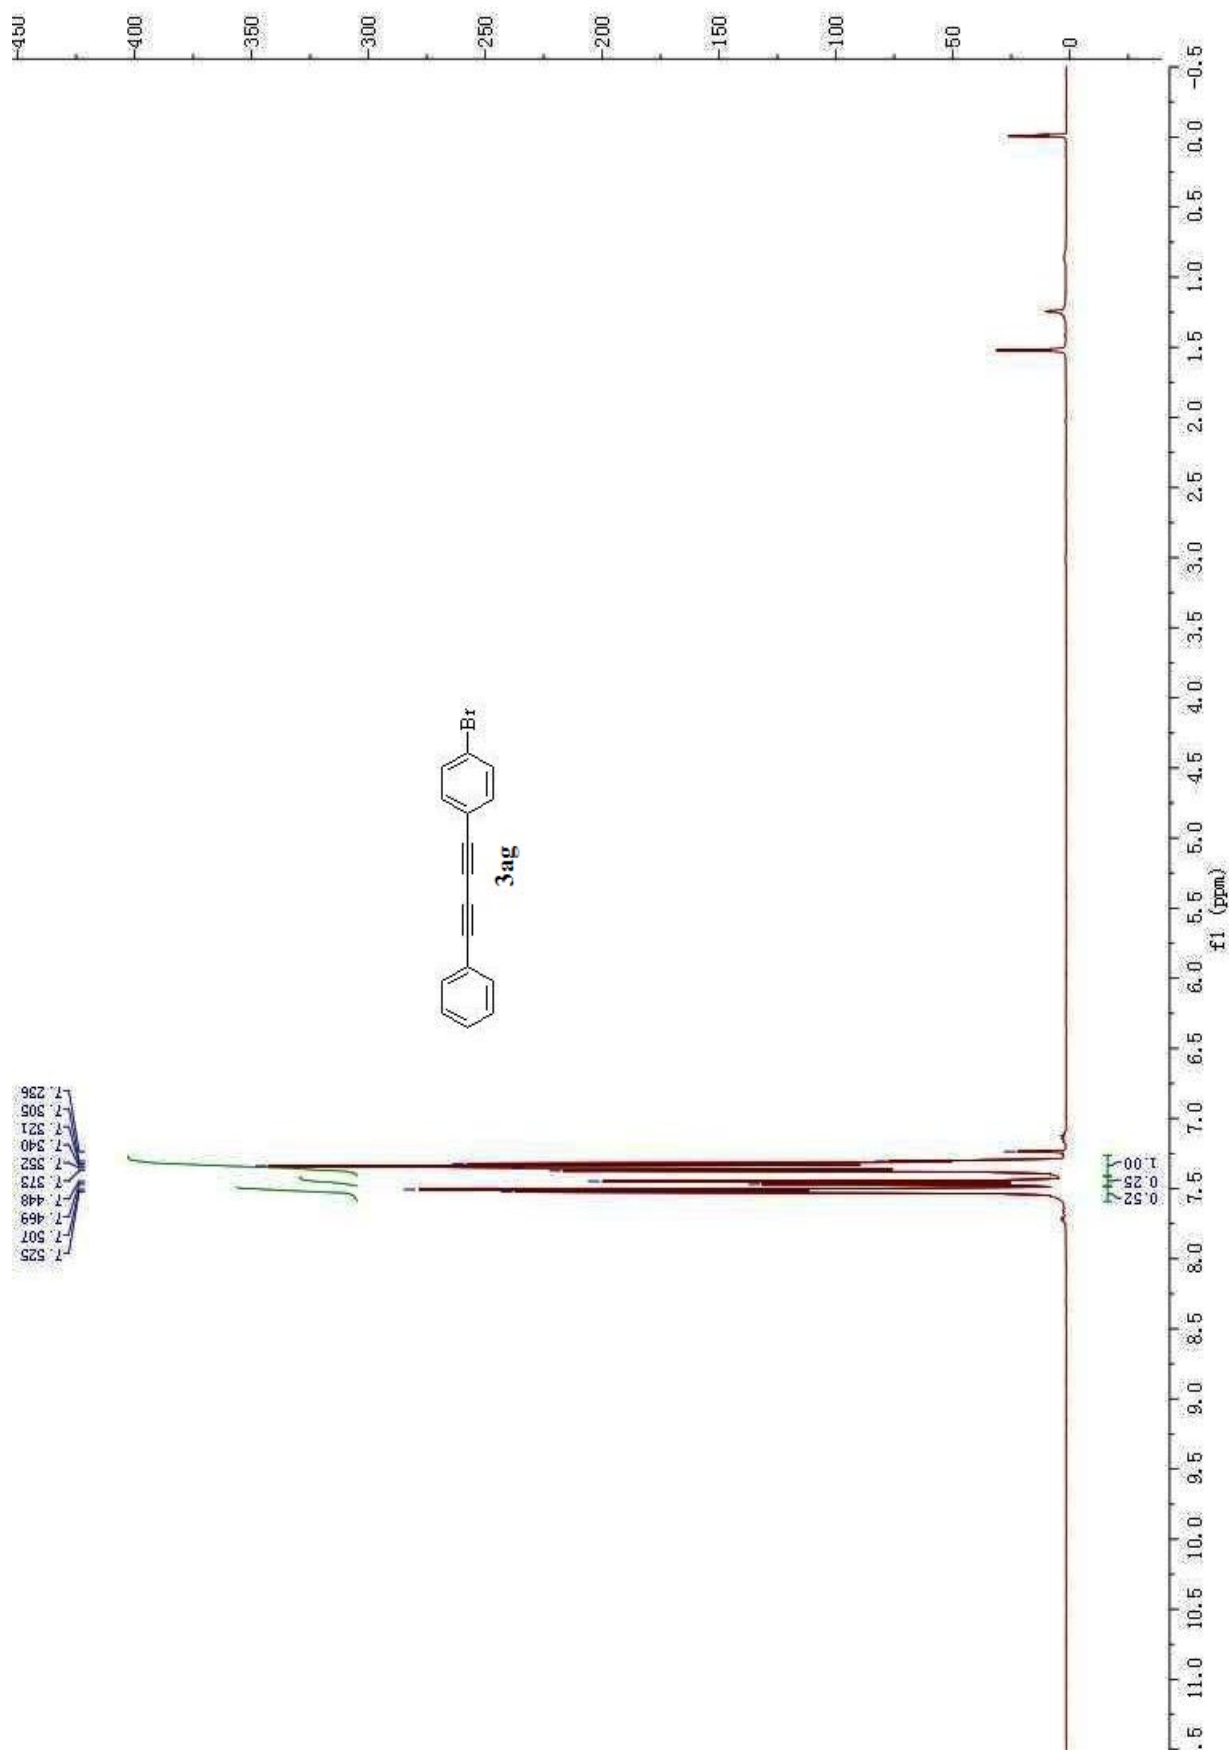

<sup>13</sup>C NMR Spectrum of 1-bromo-4-(4-phenylbuta-1,3-diyne)benzene (**3ag**)

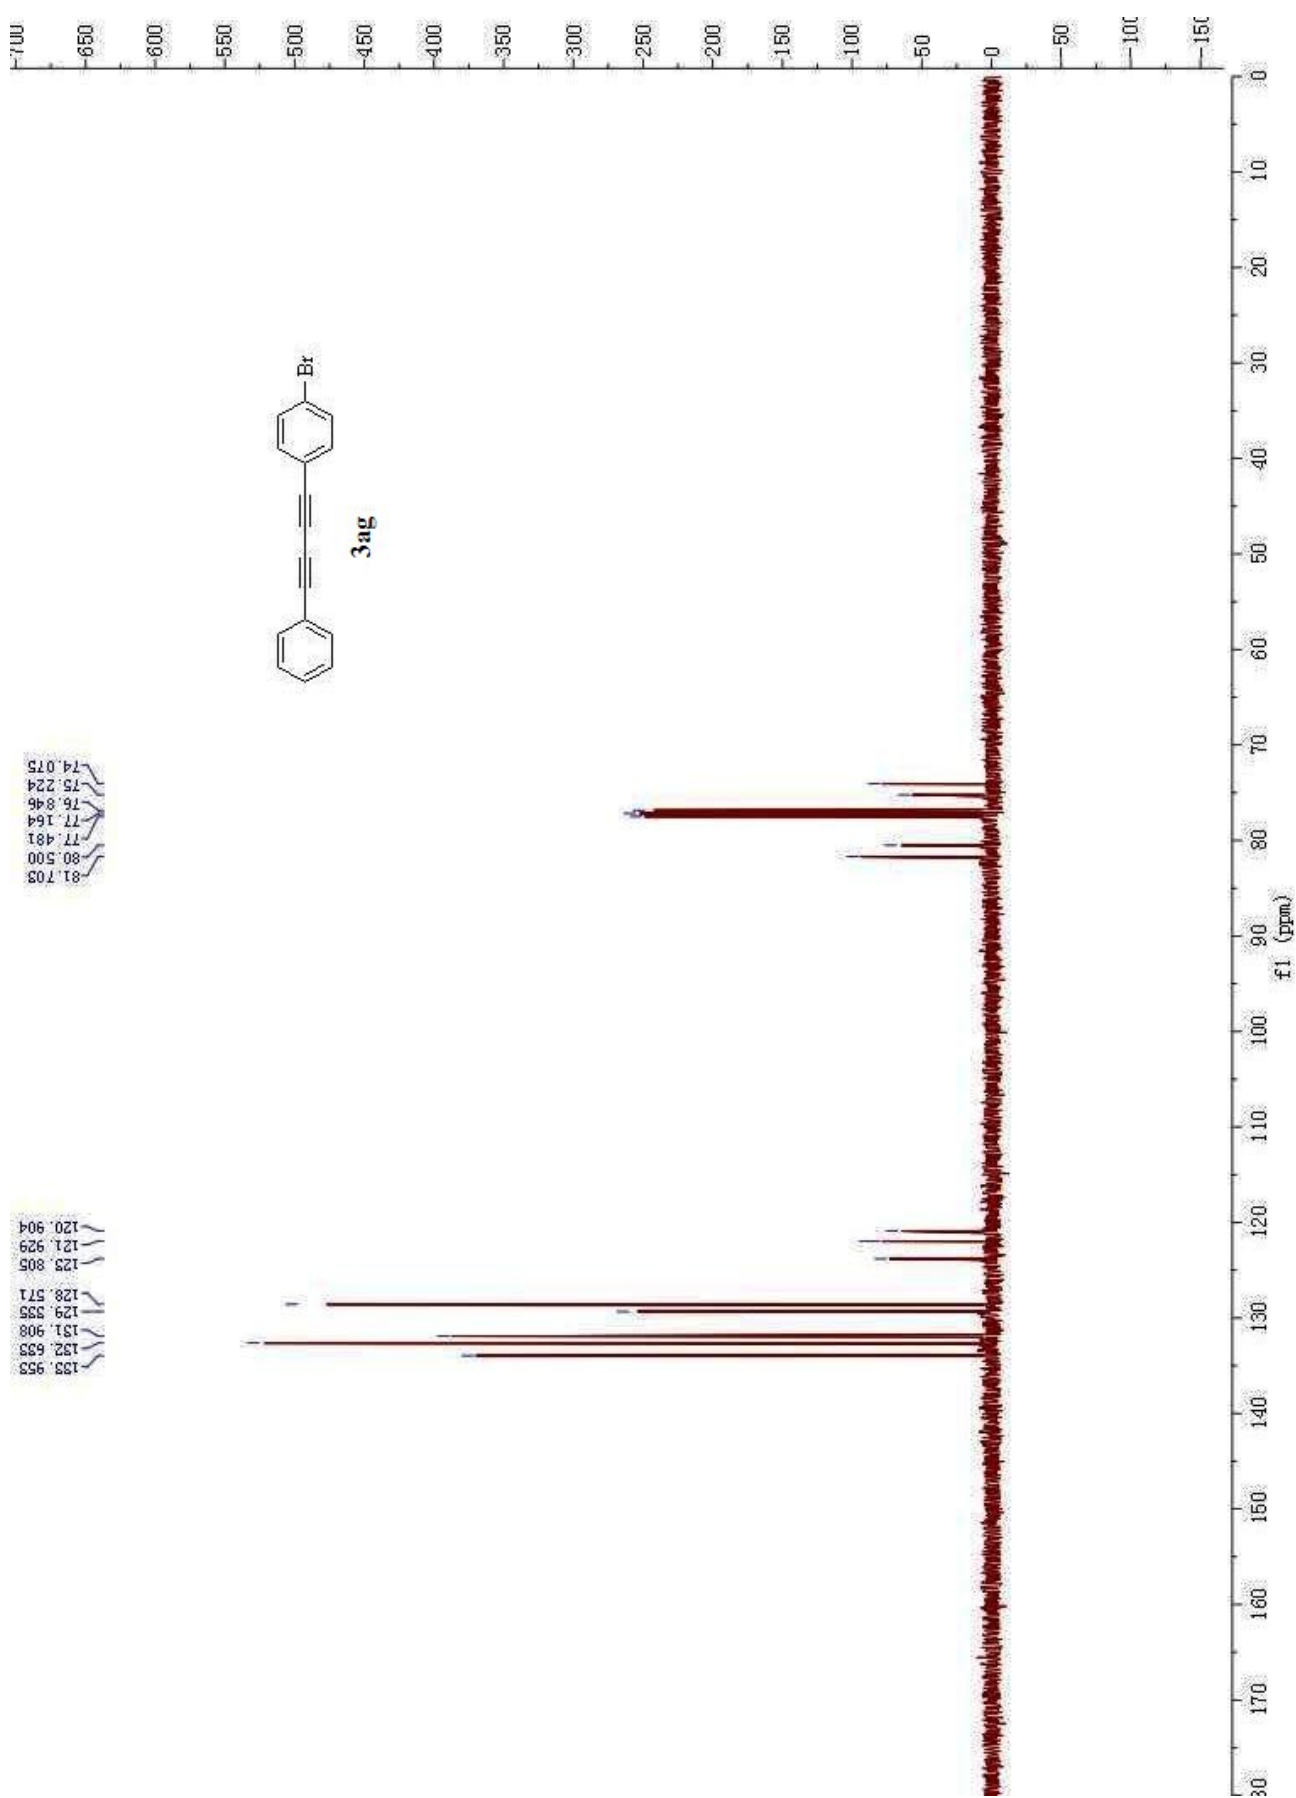

<sup>1</sup>H NMR Spectrum of 1-chloro-4-(4-phenylbuta-1,3-diynyl)benzene (**3ah**)

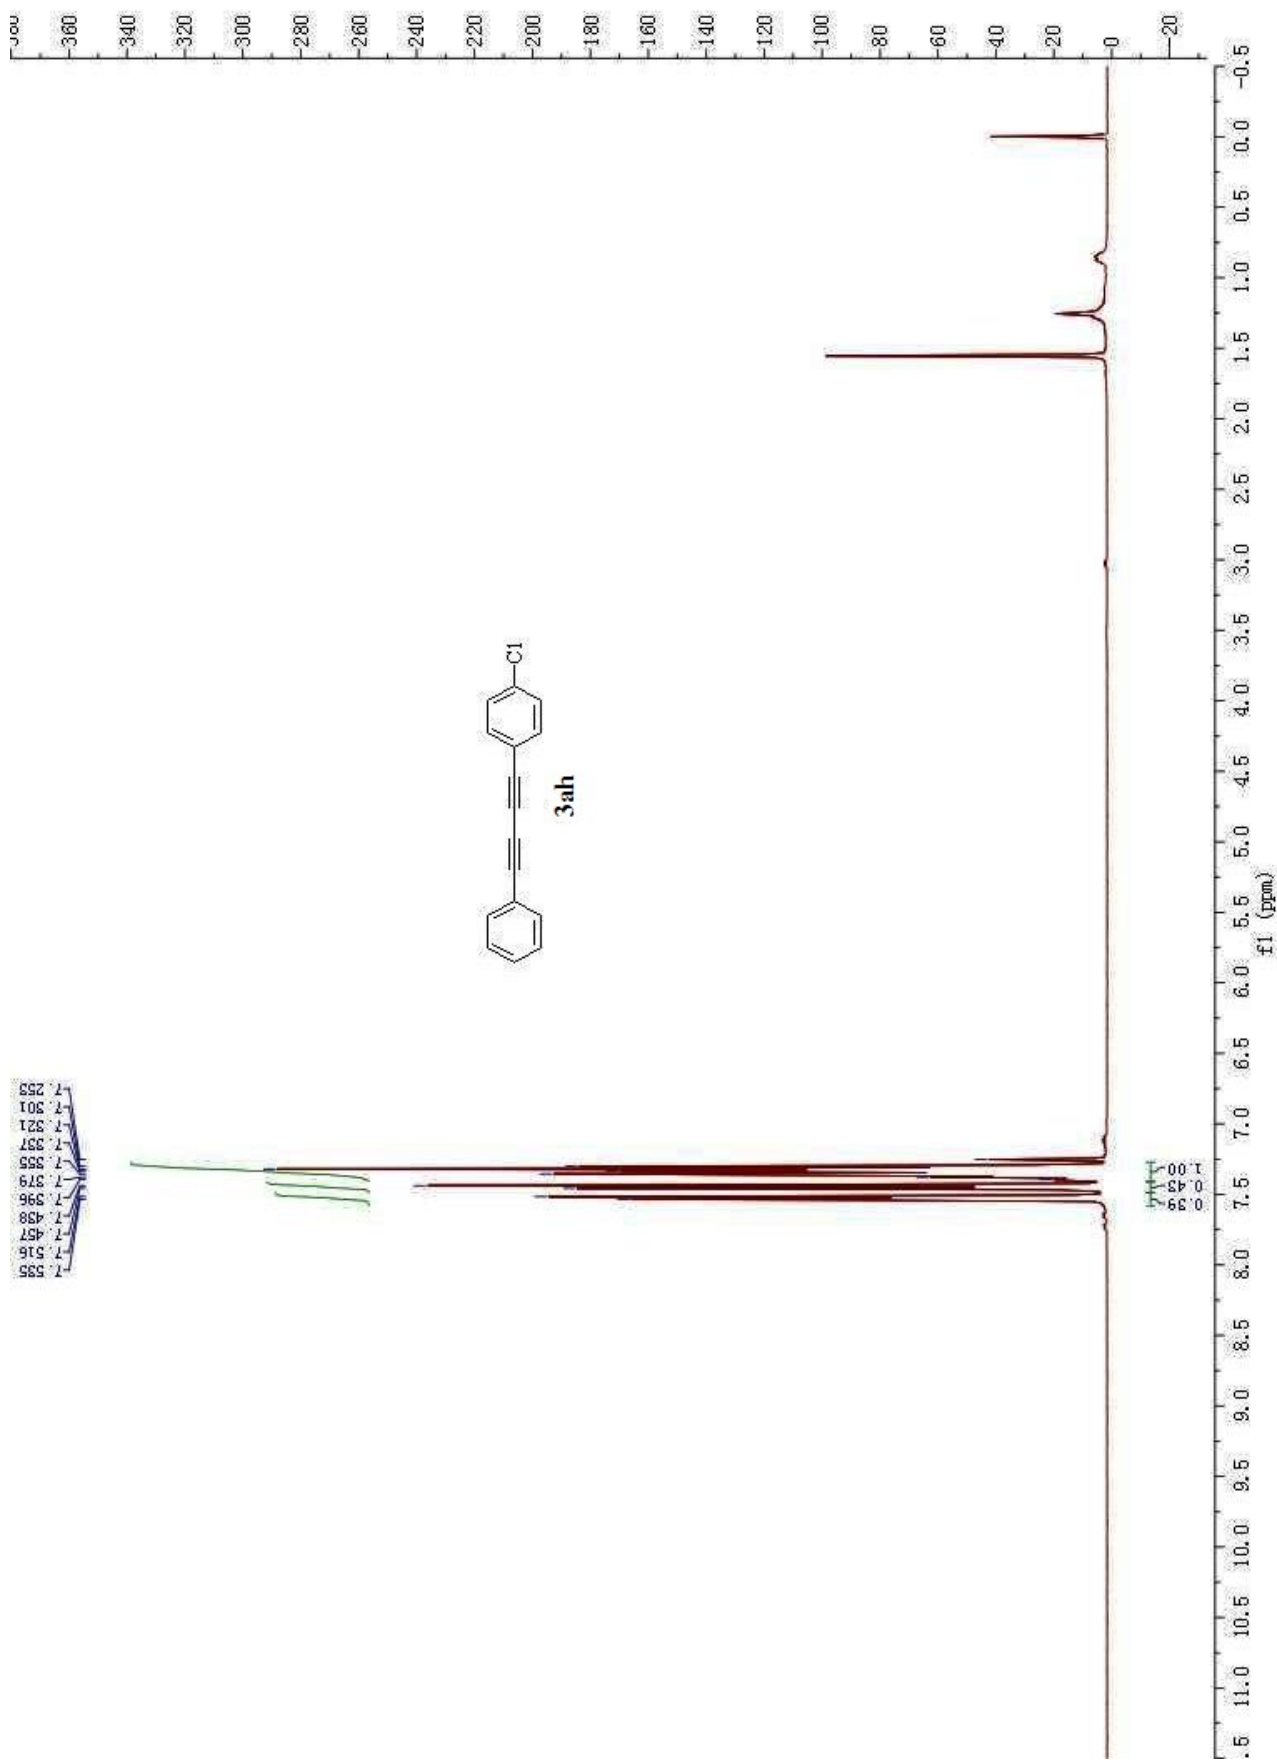

<sup>13</sup>C NMR Spectrum of 1-chloro-4-(4-phenylbuta-1,3-diynyl)benzene (**3ah**)

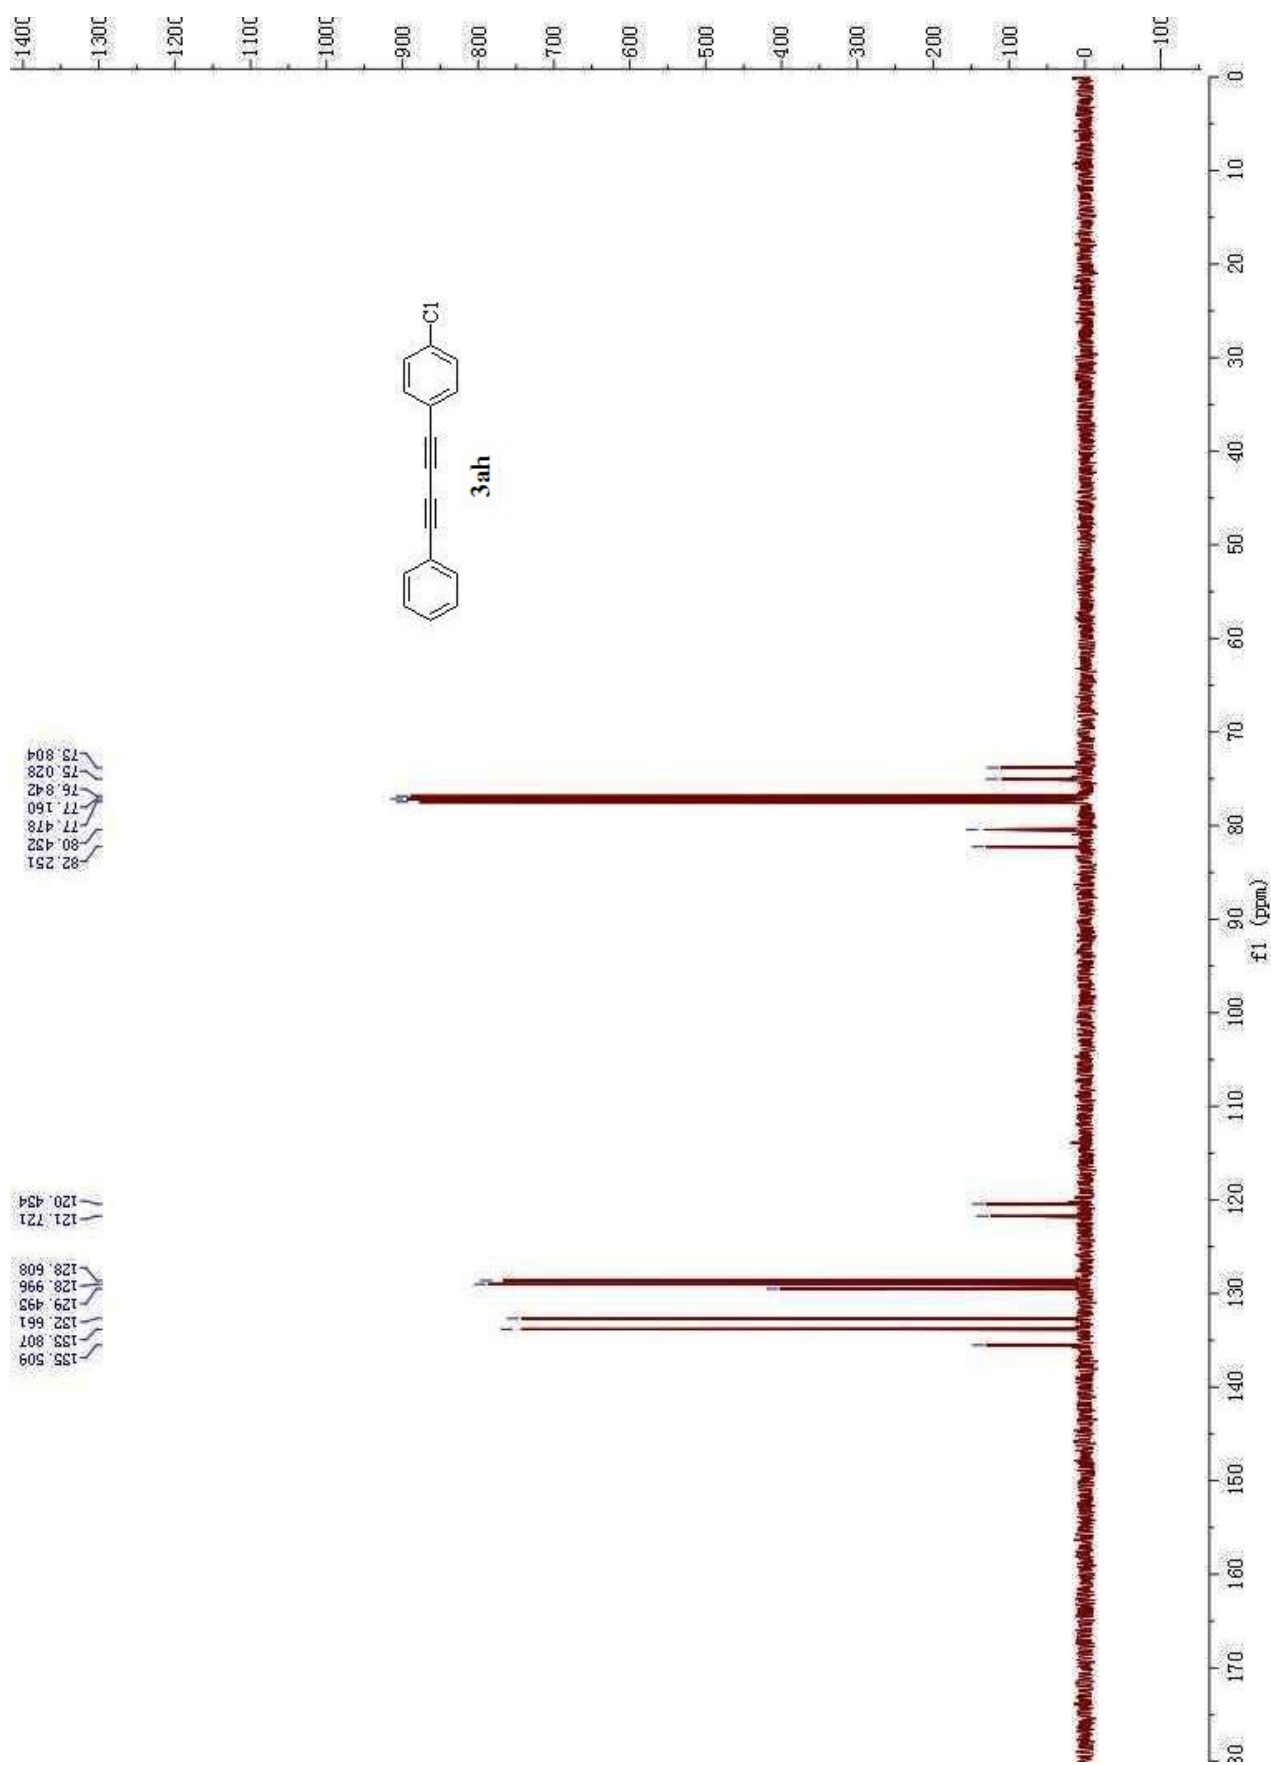

<sup>1</sup>H NMR Spectrum of 1-fluoro-4-(4-phenylbuta-1,3-diynyl)benzene (**3ai**)

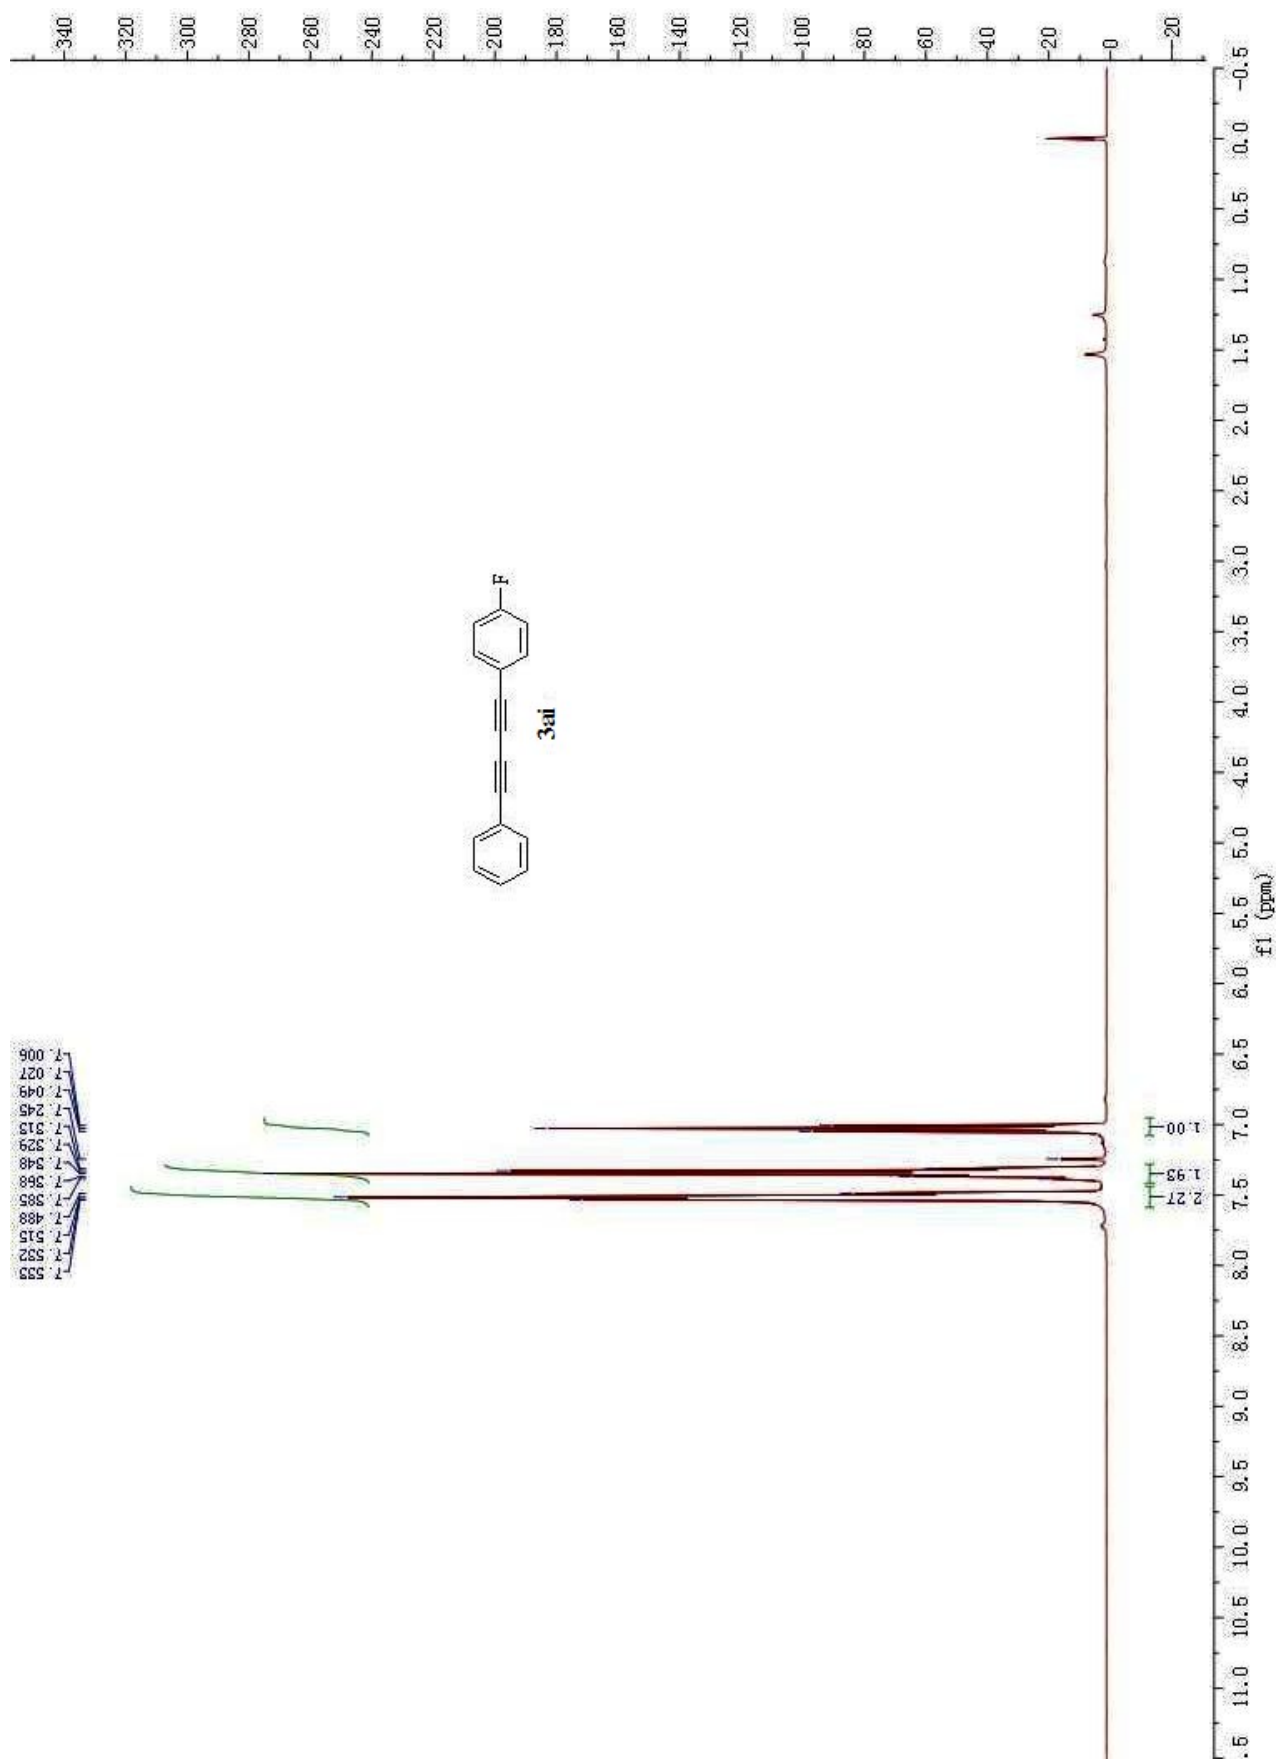

<sup>13</sup>C NMR Spectrum of 1-fluoro-4-(4-phenylbuta-1,3-dienyl)benzene (**3ai**)

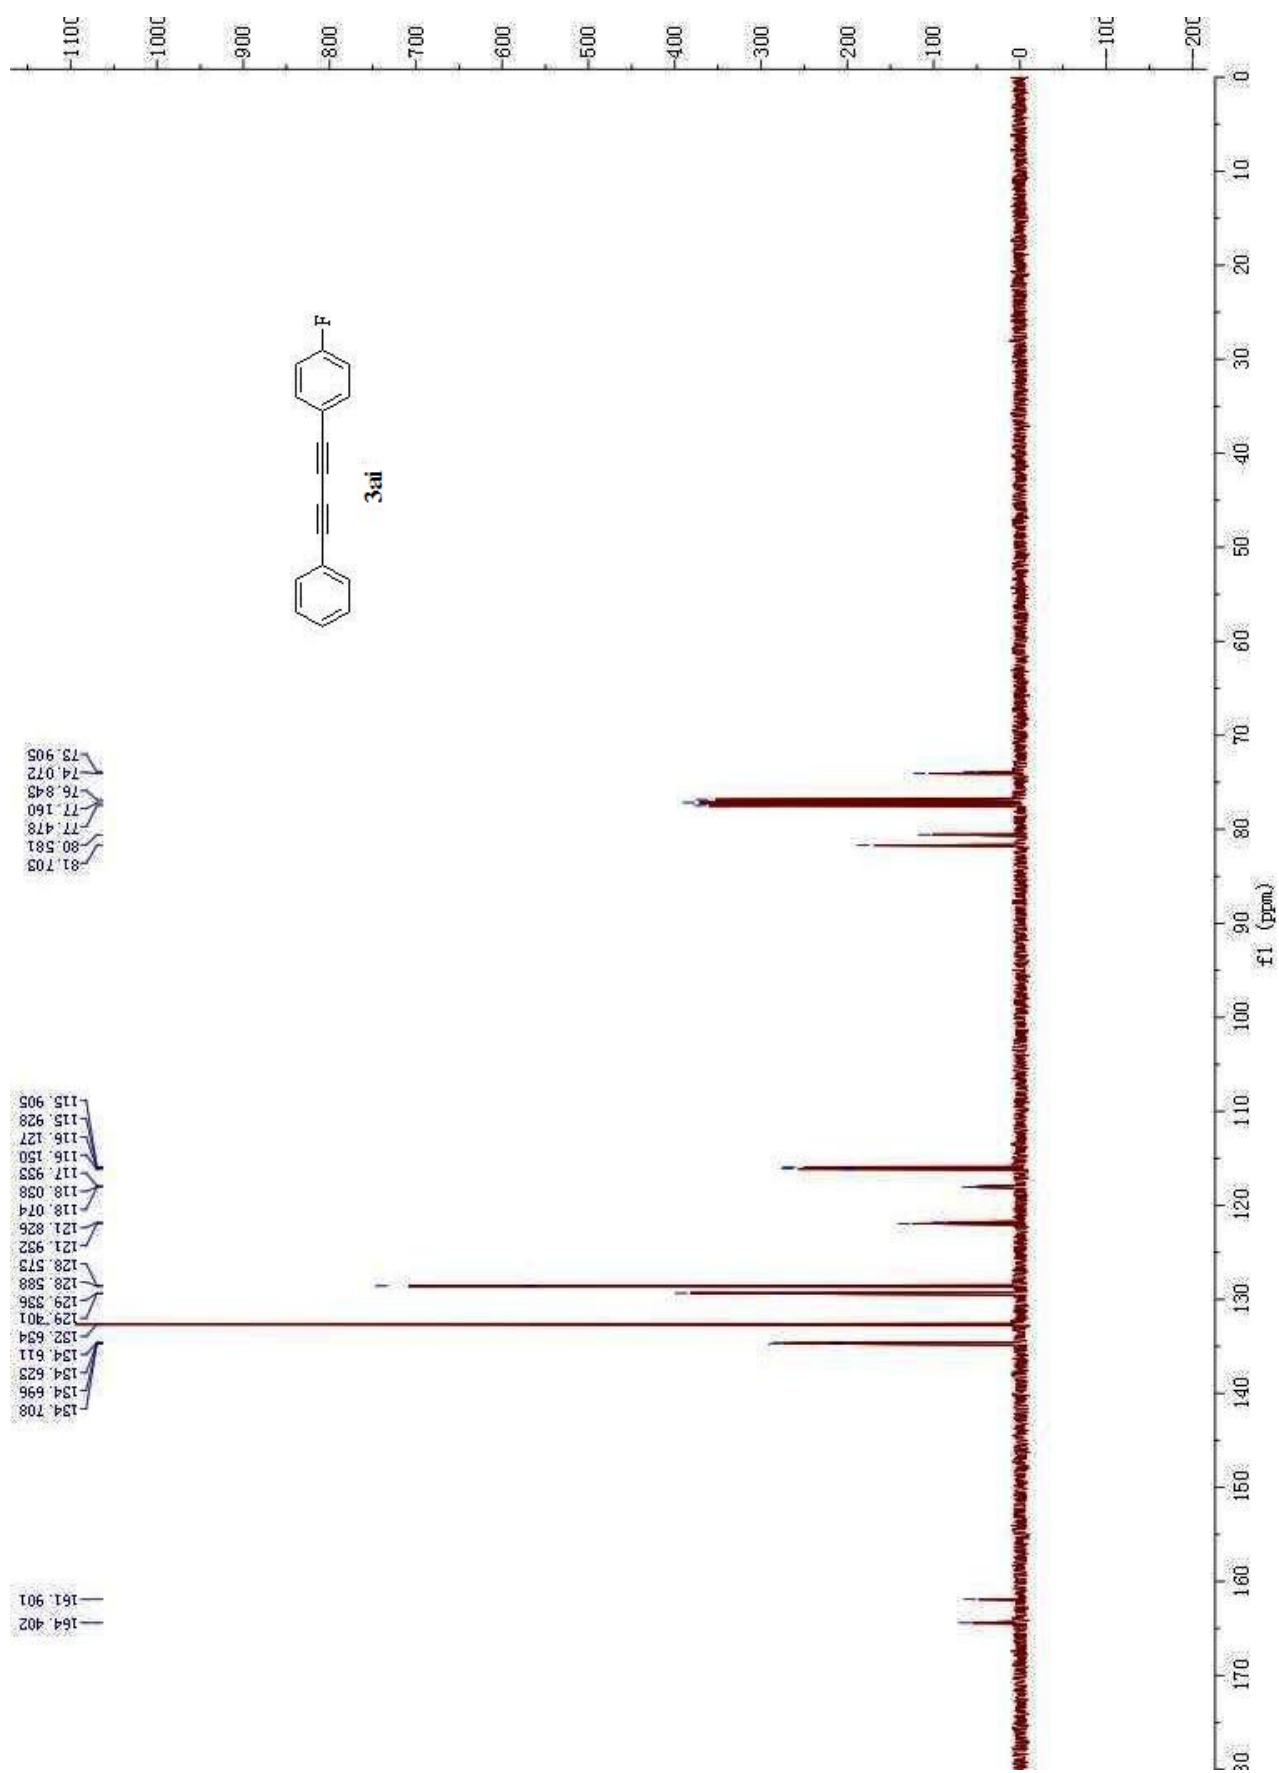

<sup>1</sup>H NMR Spectrum of 1-fluoro-3-(4-phenylbuta-1,3-diynyl)benzene (**3aj**)

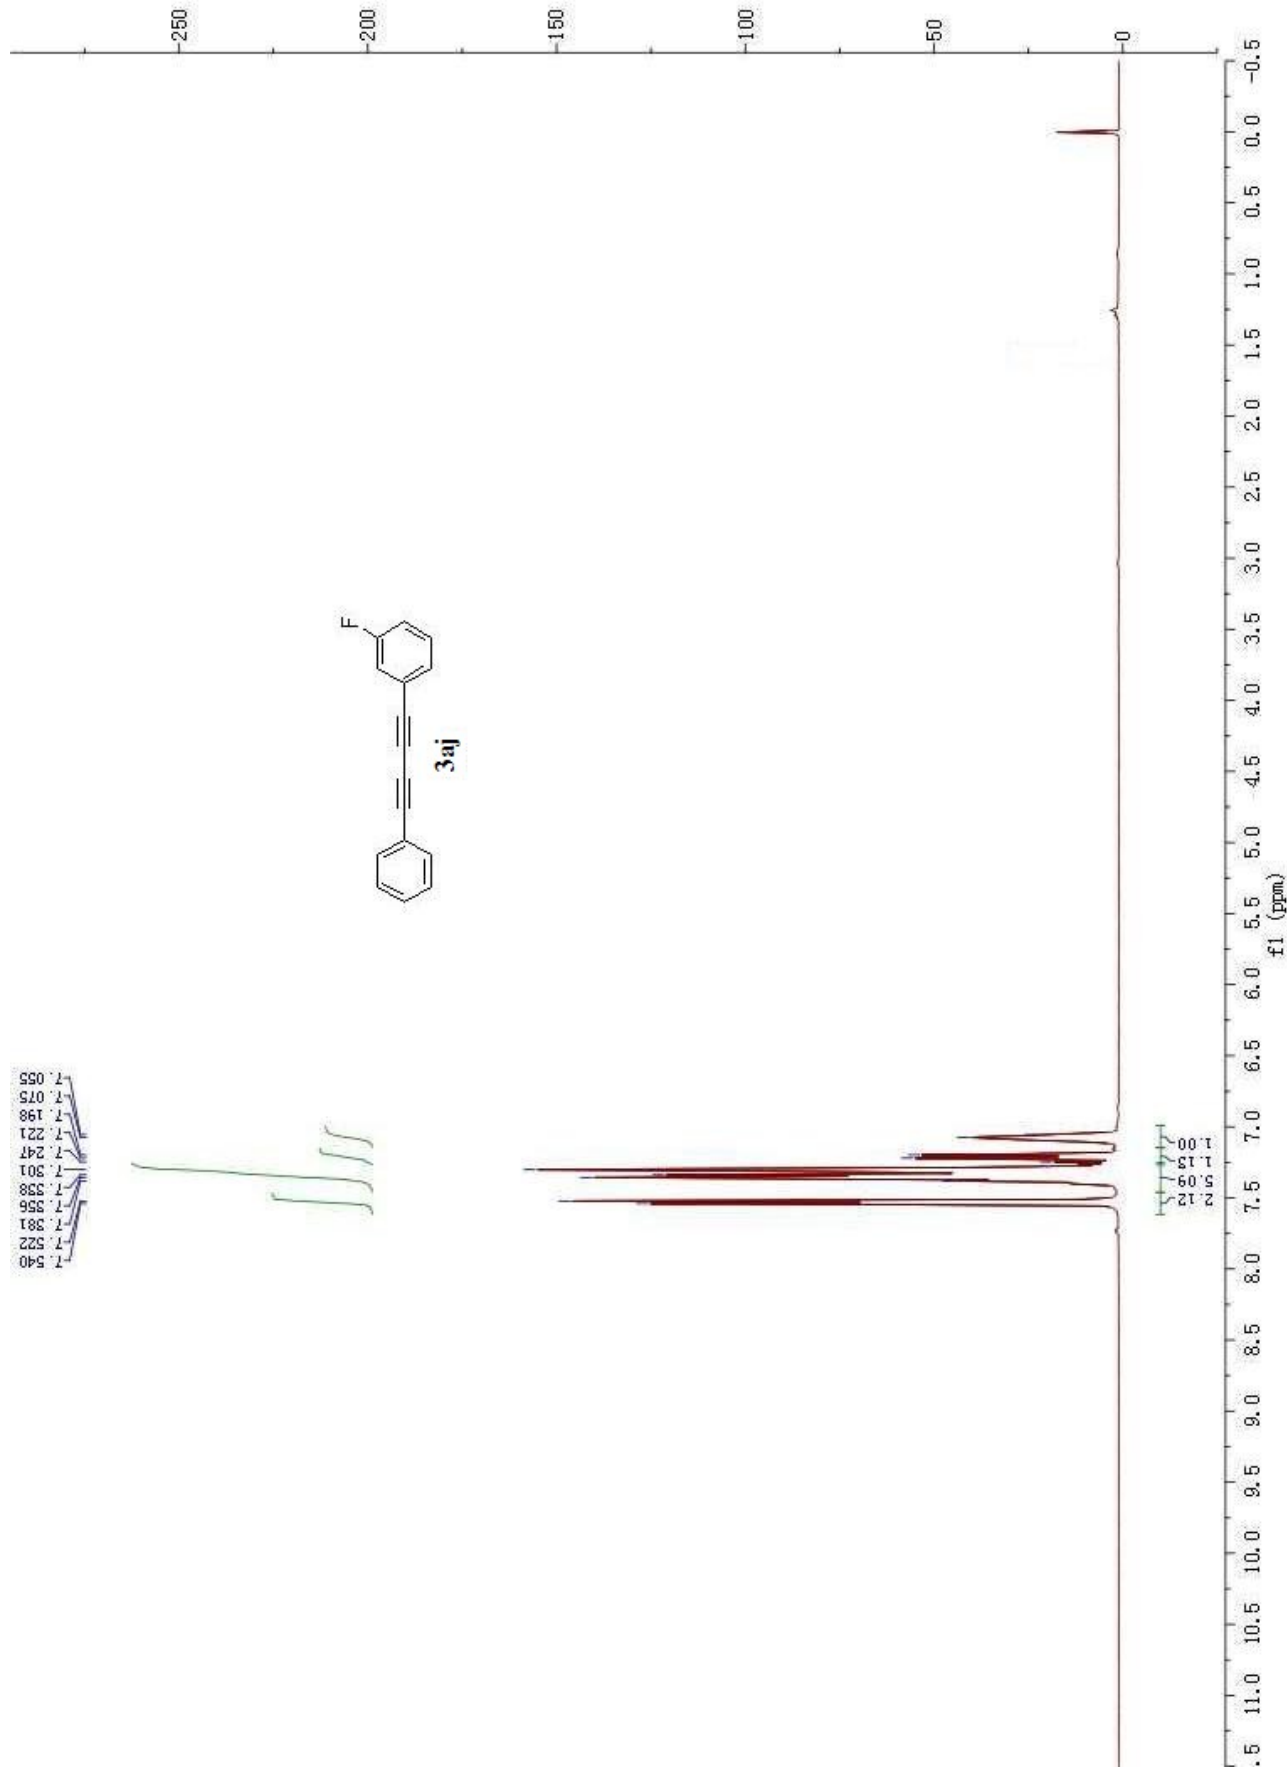



<sup>13</sup>C NMR Spectrum of 1-fluoro-3-(4-phenylbuta-1,3-diynyl)benzene (**3aj**)

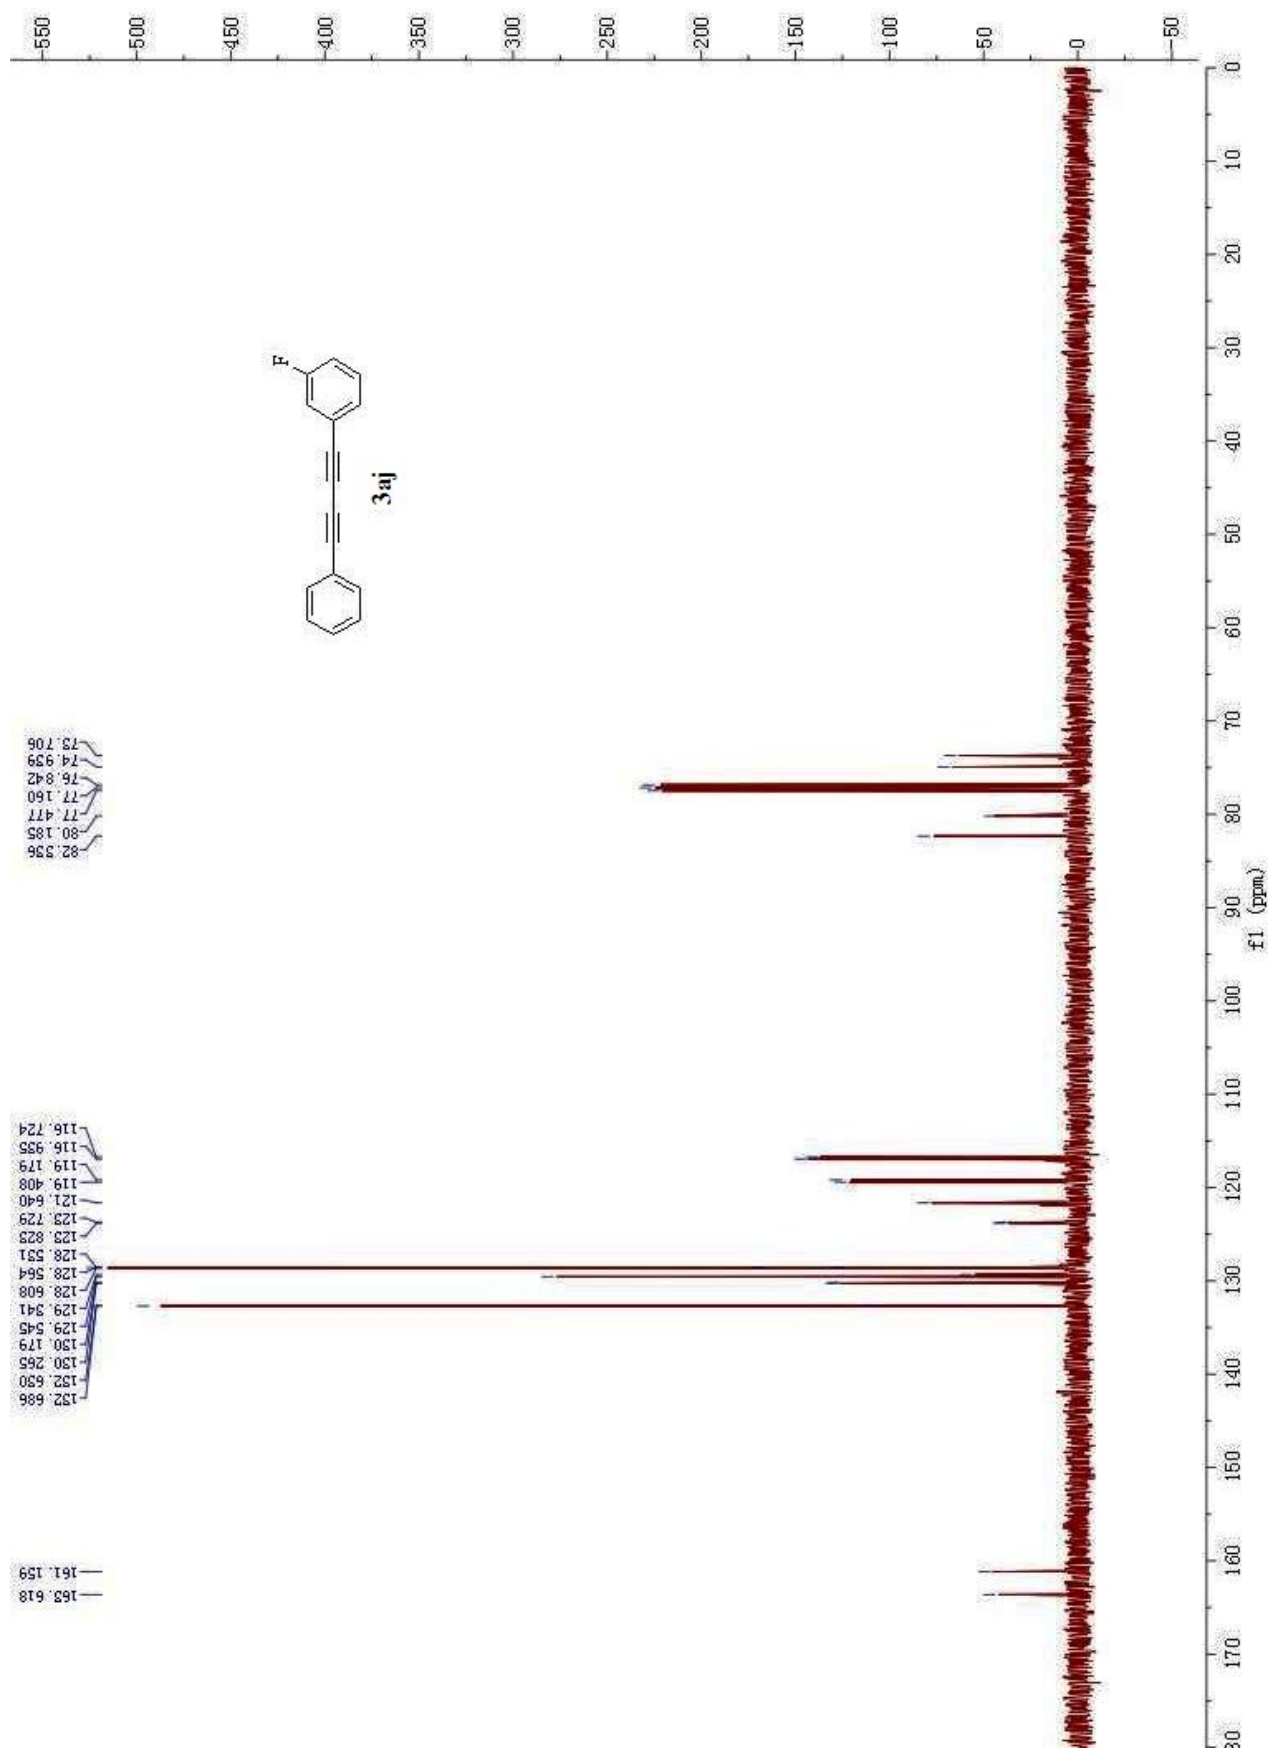

<sup>1</sup>H NMR Spectrum of 1-fluoro-2-(4-phenylbuta-1,3-diynyl)benzene (**3ak**)

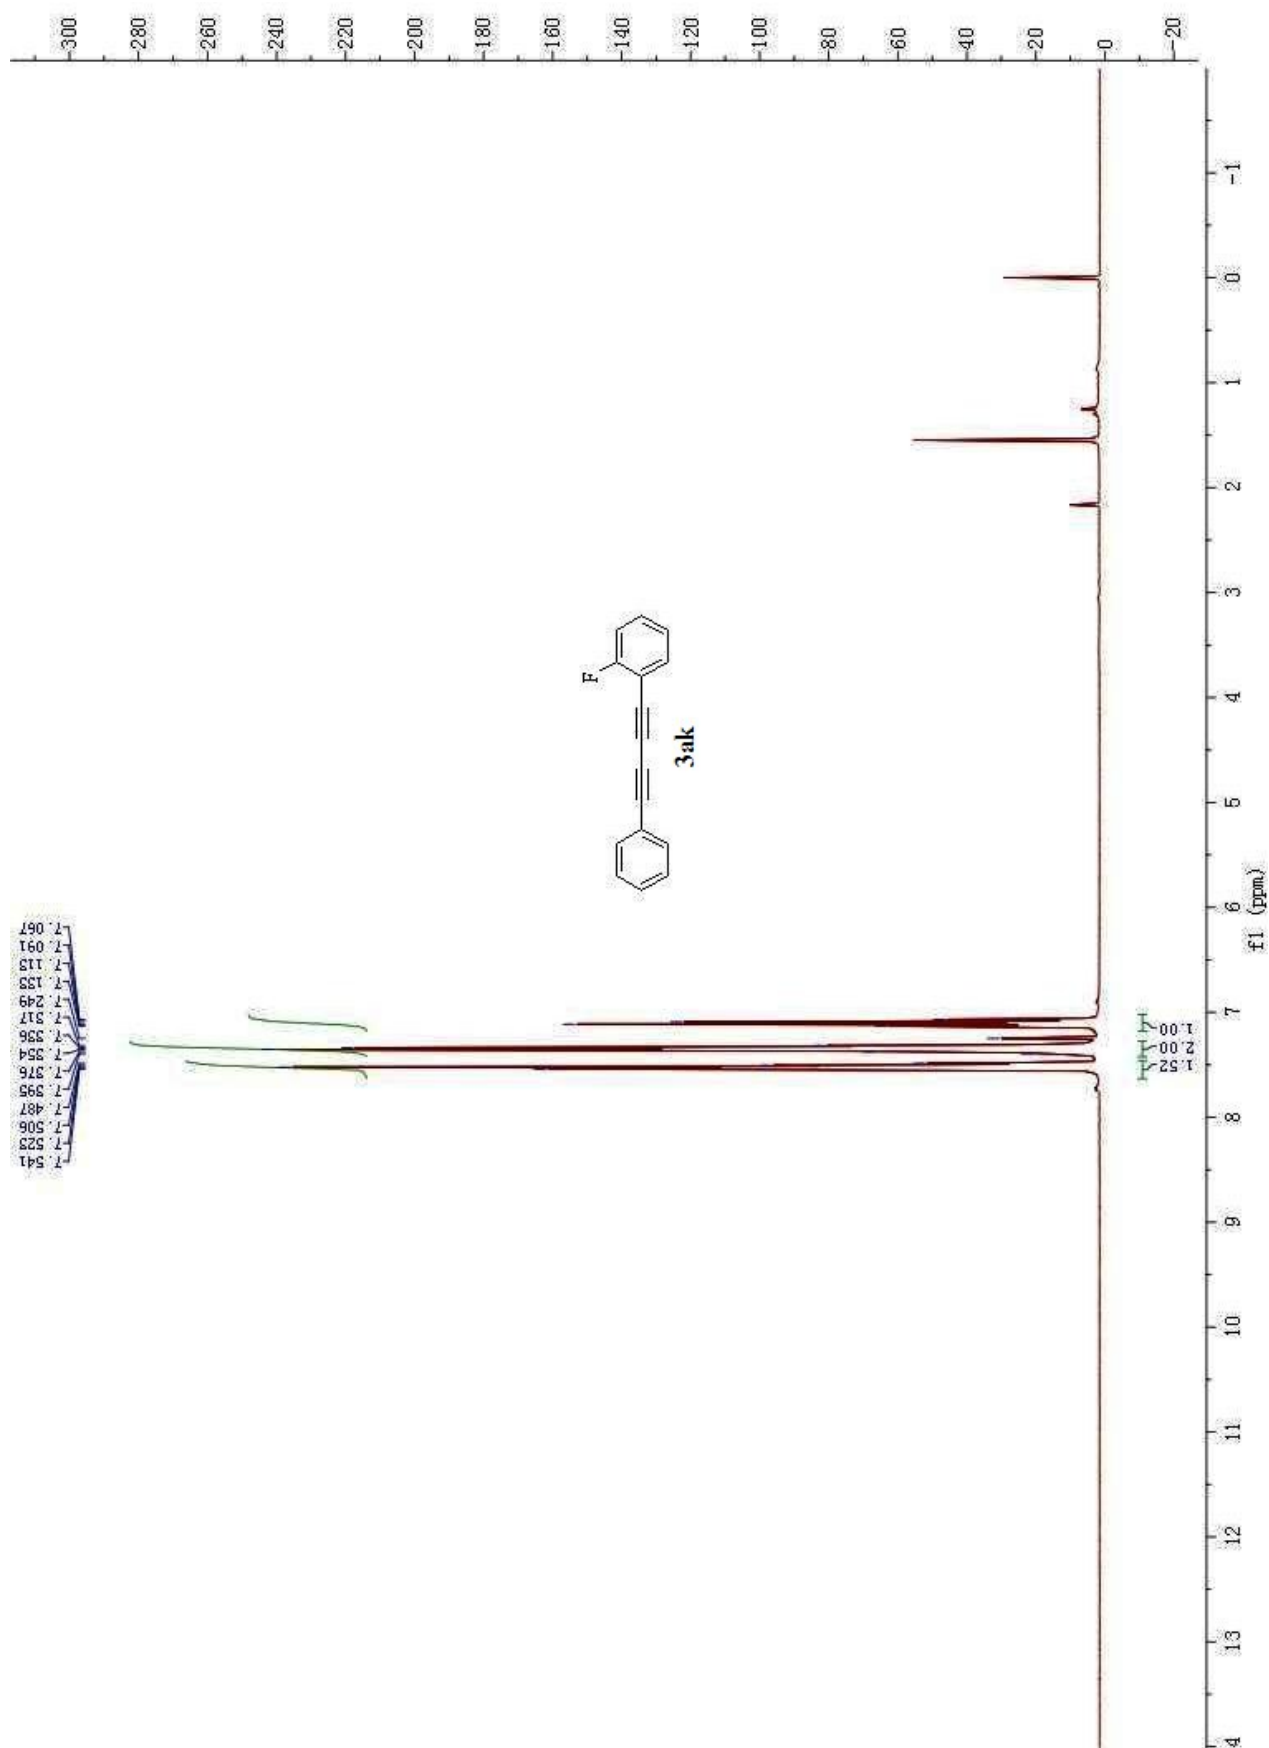

<sup>13</sup>C NMR Spectrum of 1-fluoro-2-(4-phenylbuta-1,3-dienyl)benzene (**3ak**)

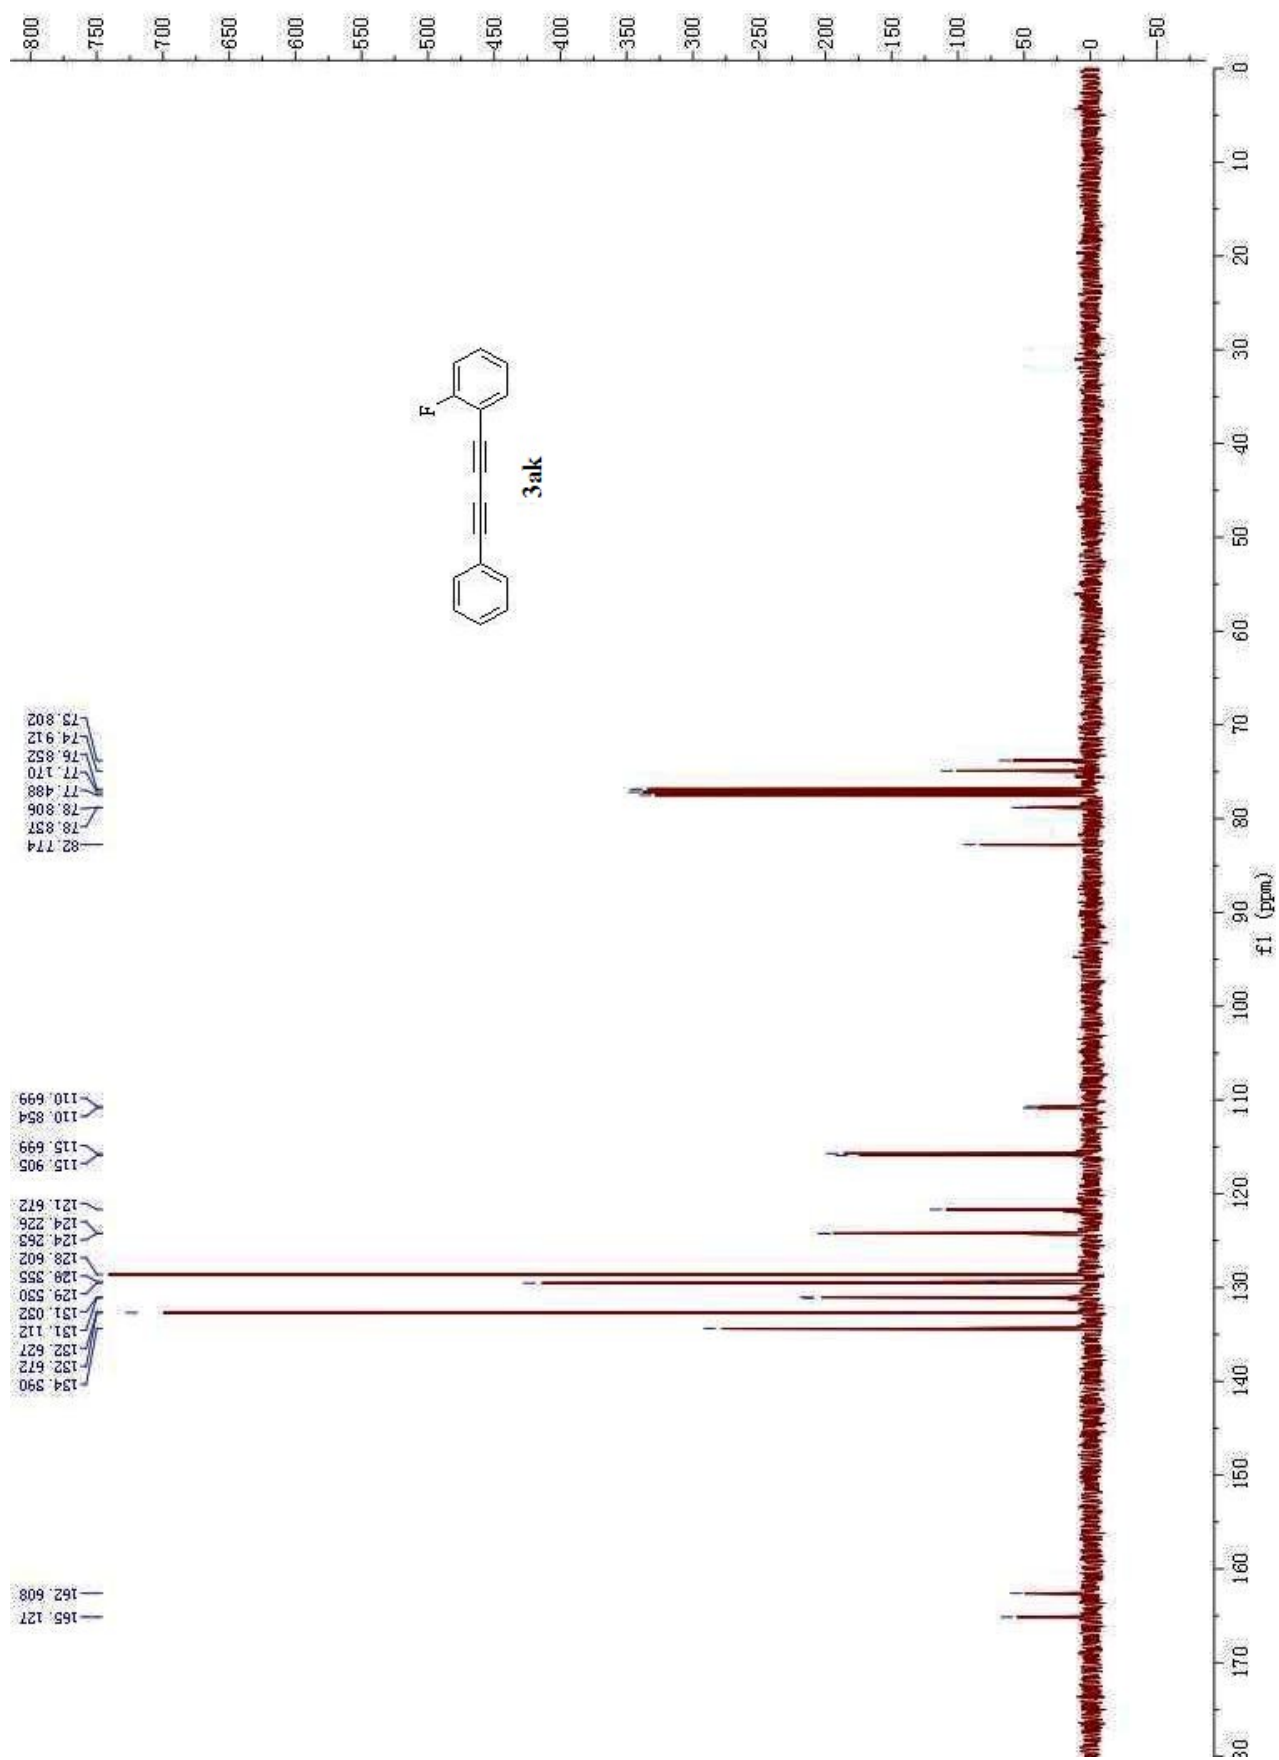

<sup>1</sup>H NMR Spectrum of 1-(4-(4-(trifluoromethyl)phenyl)buta-1,3-diyne)benzene (**3al**)

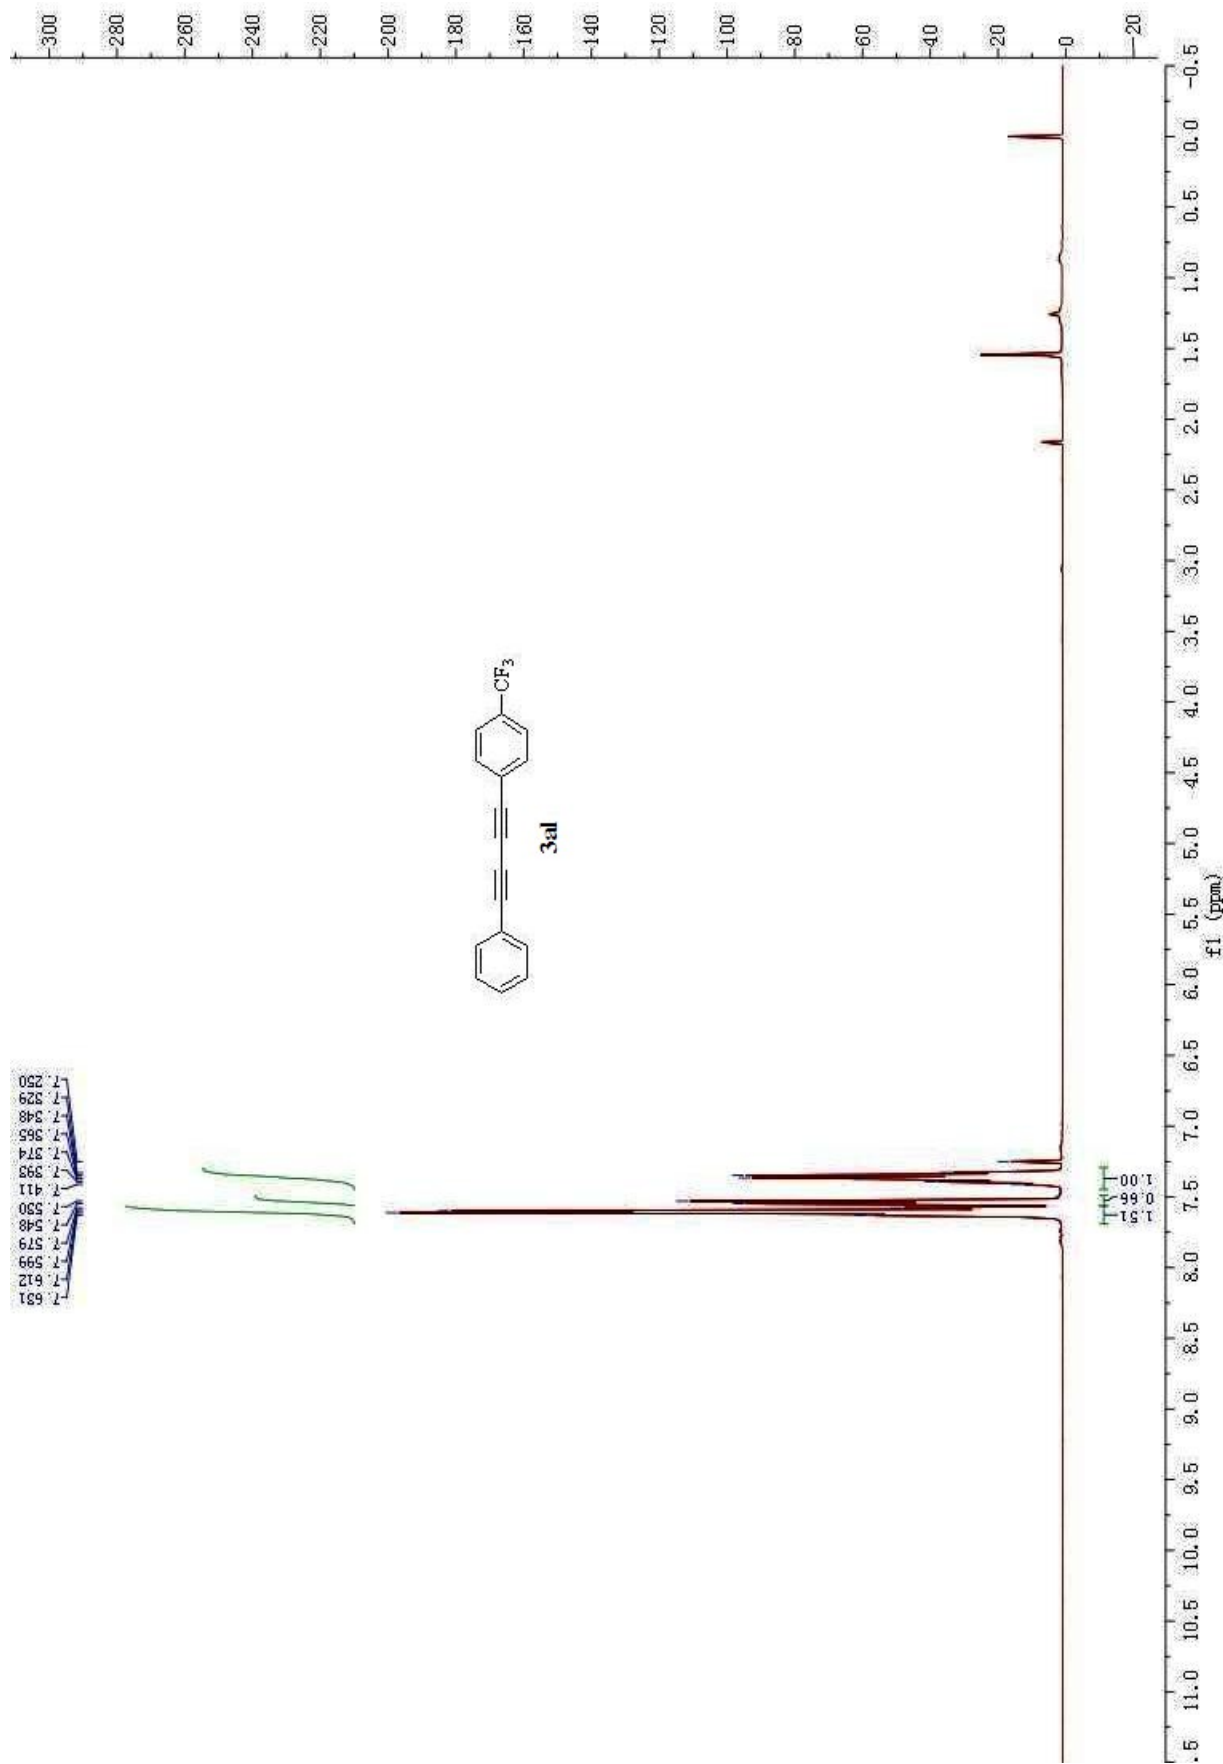

<sup>13</sup>C NMR Spectrum of 1-(4-(4-(trifluoromethyl)phenyl)buta-1,3-diynyl)benzene (**3al**)

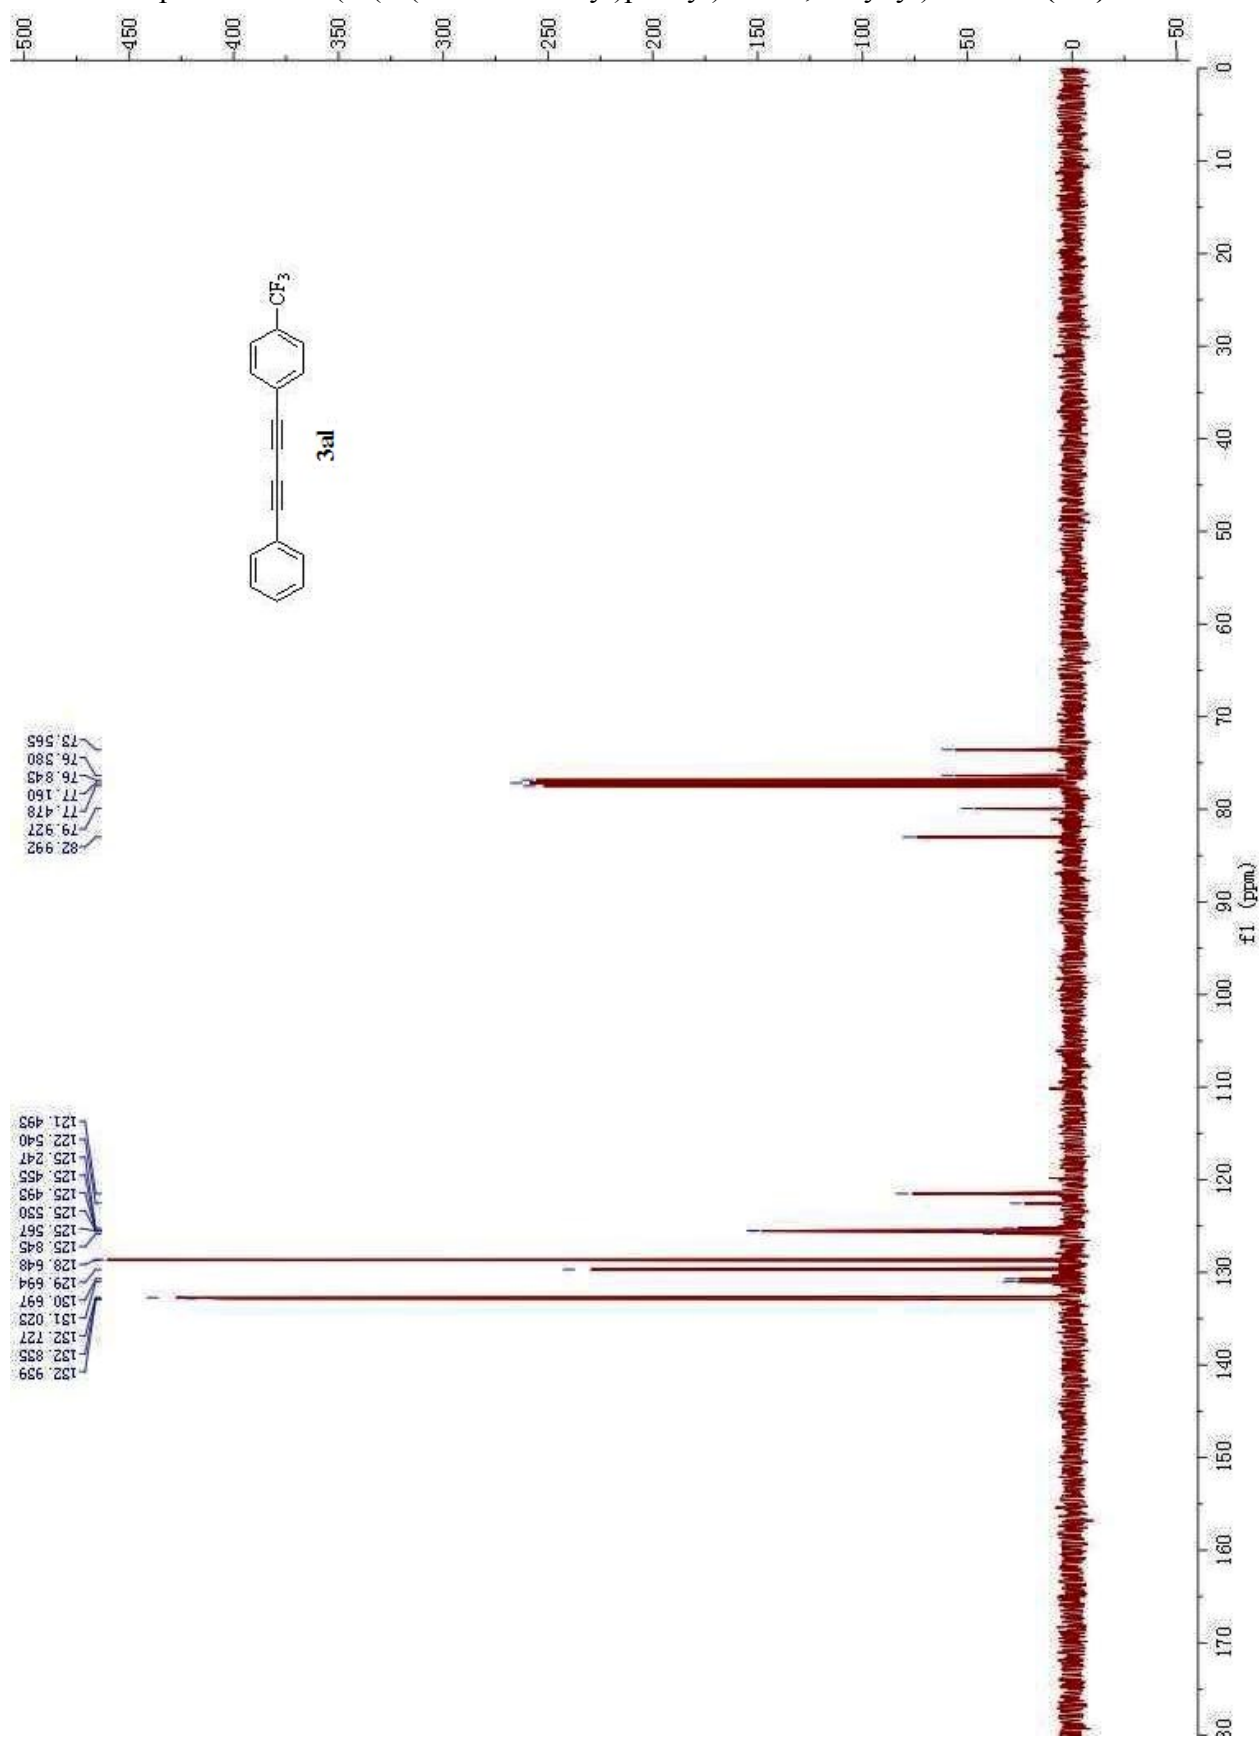

<sup>1</sup>H NMR Spectrum of 2-(4-phenylbuta-1,3-diynyl)pyridine (**3am**)

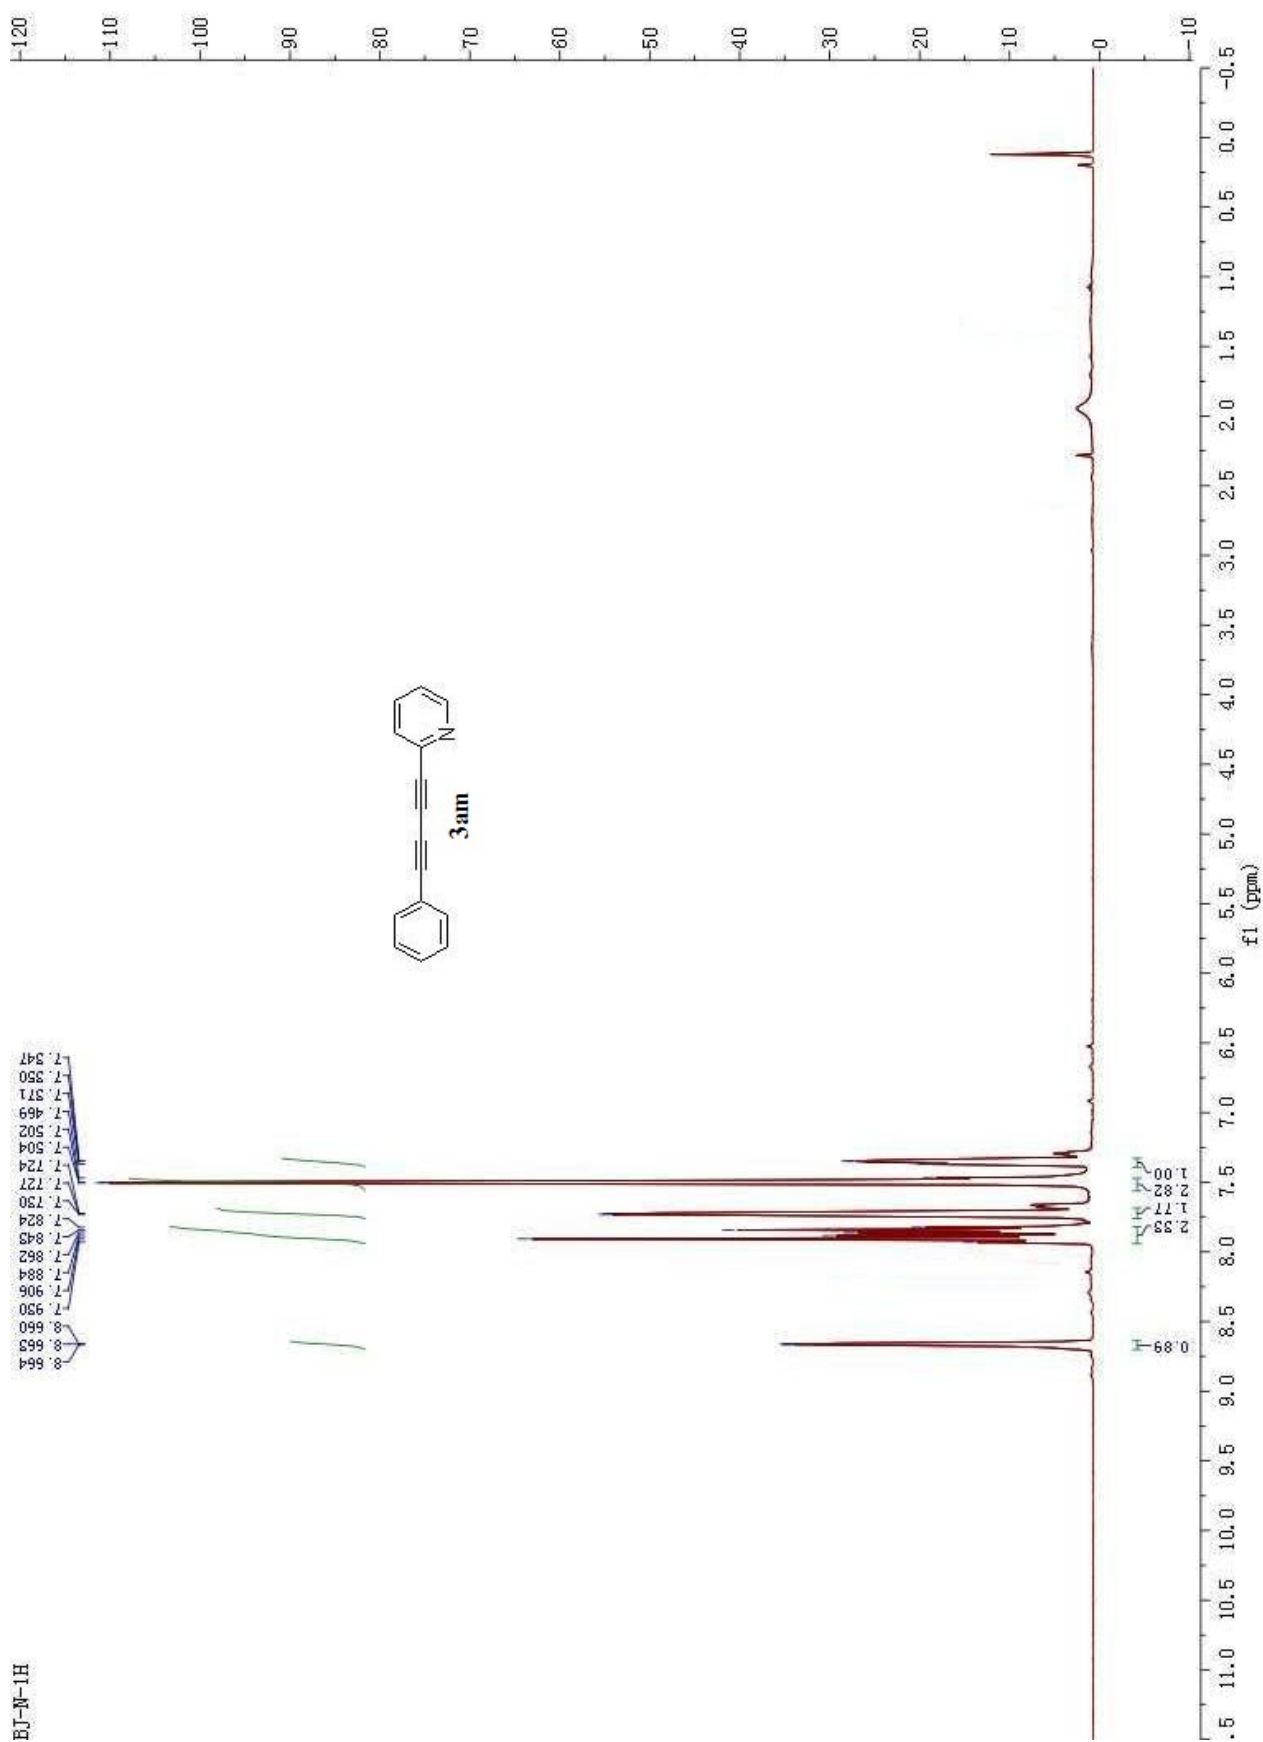

# <sup>13</sup>C NMR Spectrum of 2-(4-phenylbuta-1,3-diynyl)pyridine (**3am**)

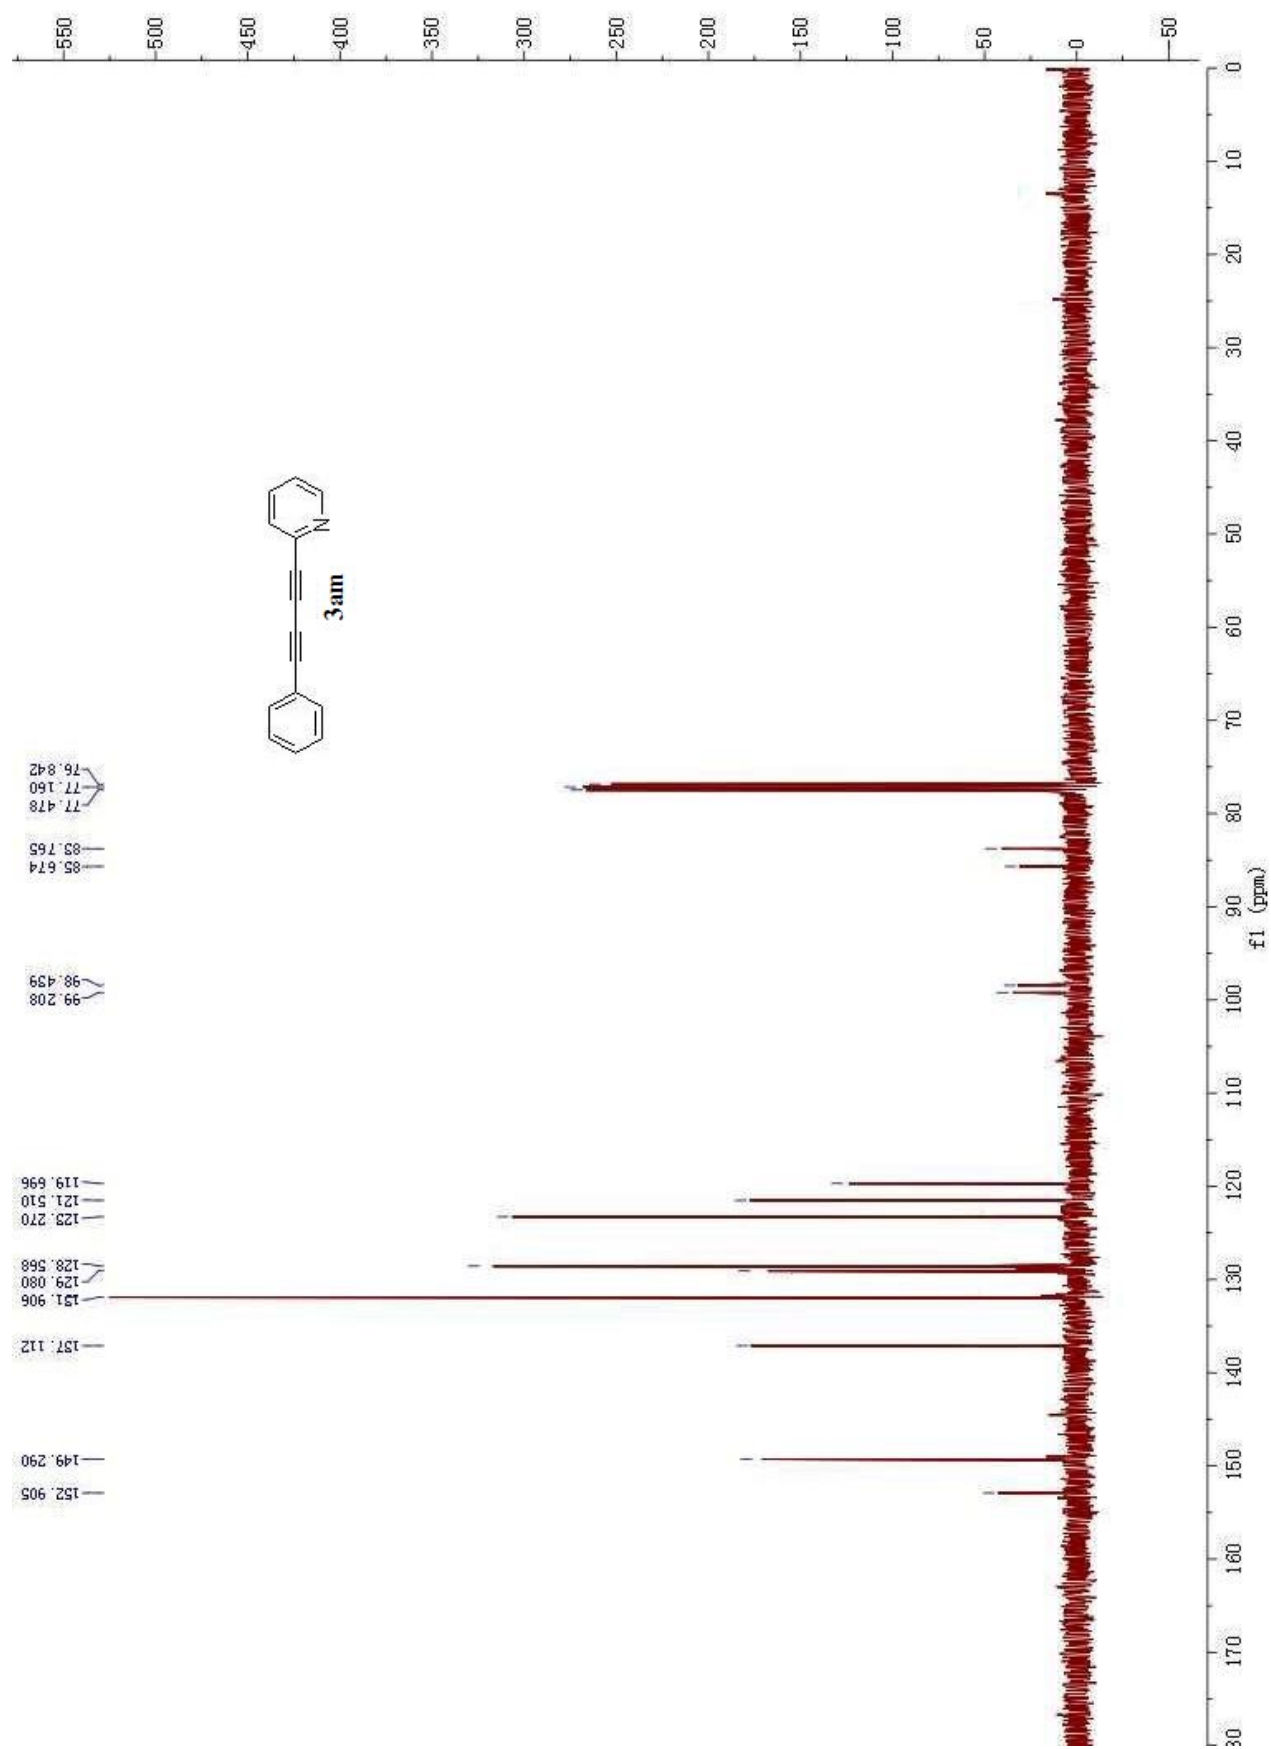

<sup>1</sup>H NMR Spectrum of 2-(4-phenylbuta-1,3-diyne)thiophene (**3an**)

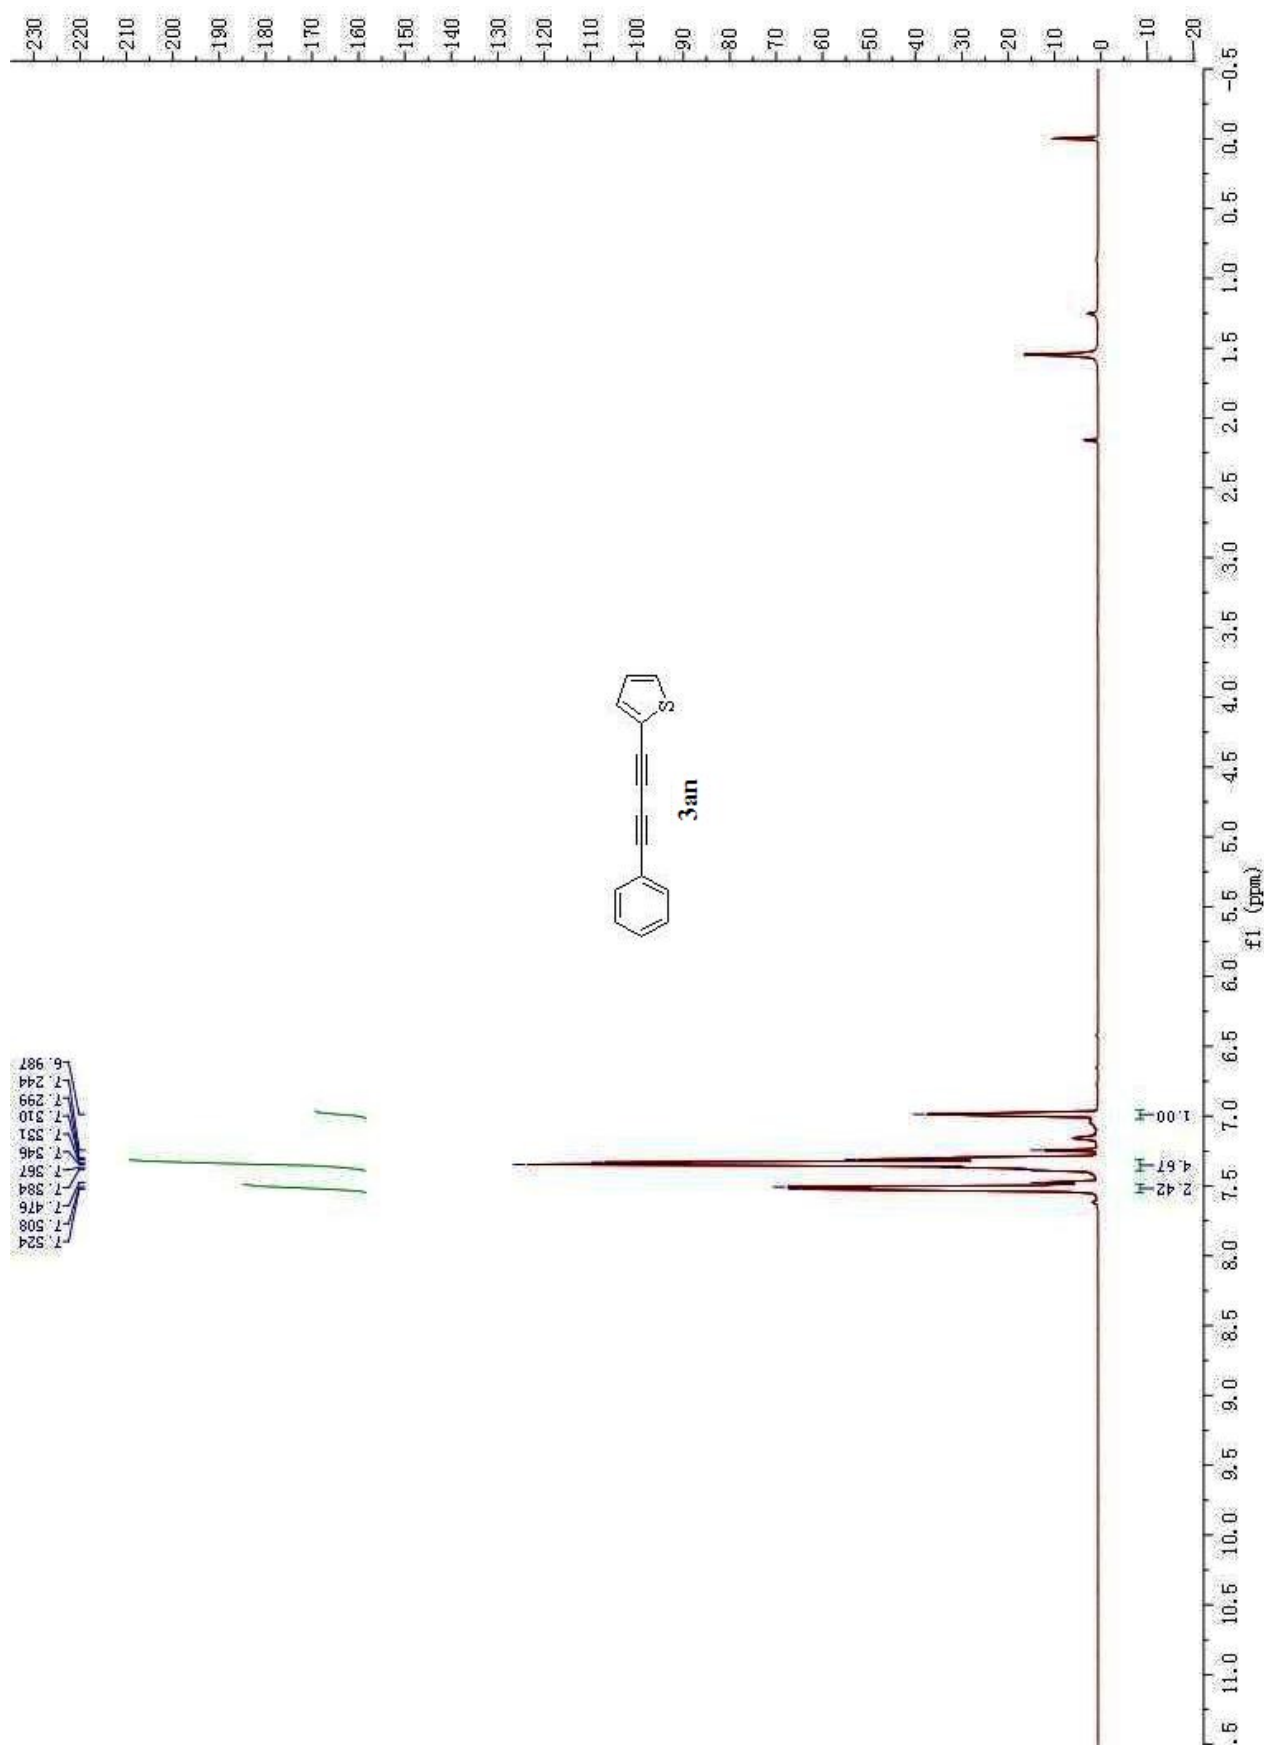



<sup>13</sup>C NMR Spectrum of 2-(4-phenylbuta-1,3-diynyl)thiophene (**3an**)

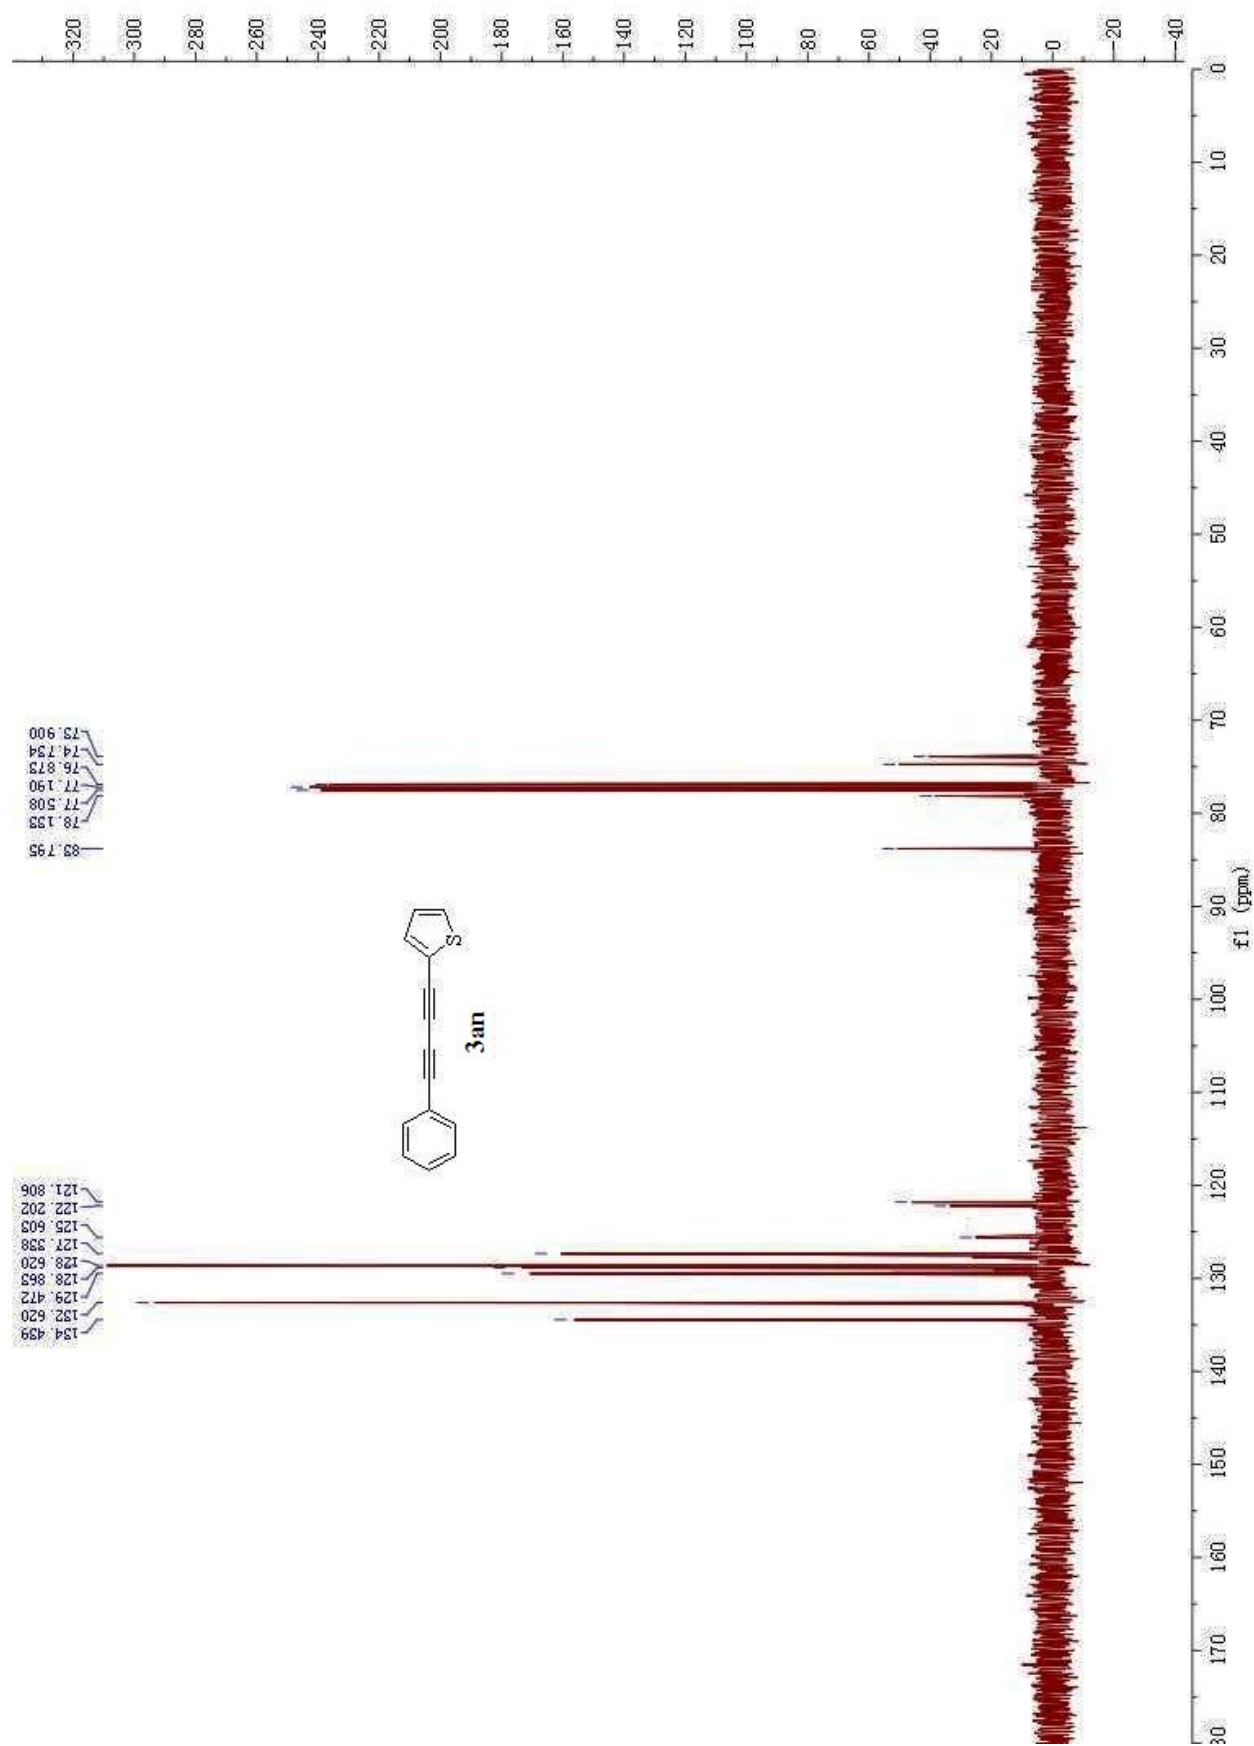

<sup>1</sup>H NMR Spectrum of 1-methoxy-4-(4-p-tolylbuta-1,3-diynyl)benzene (**3ba**)

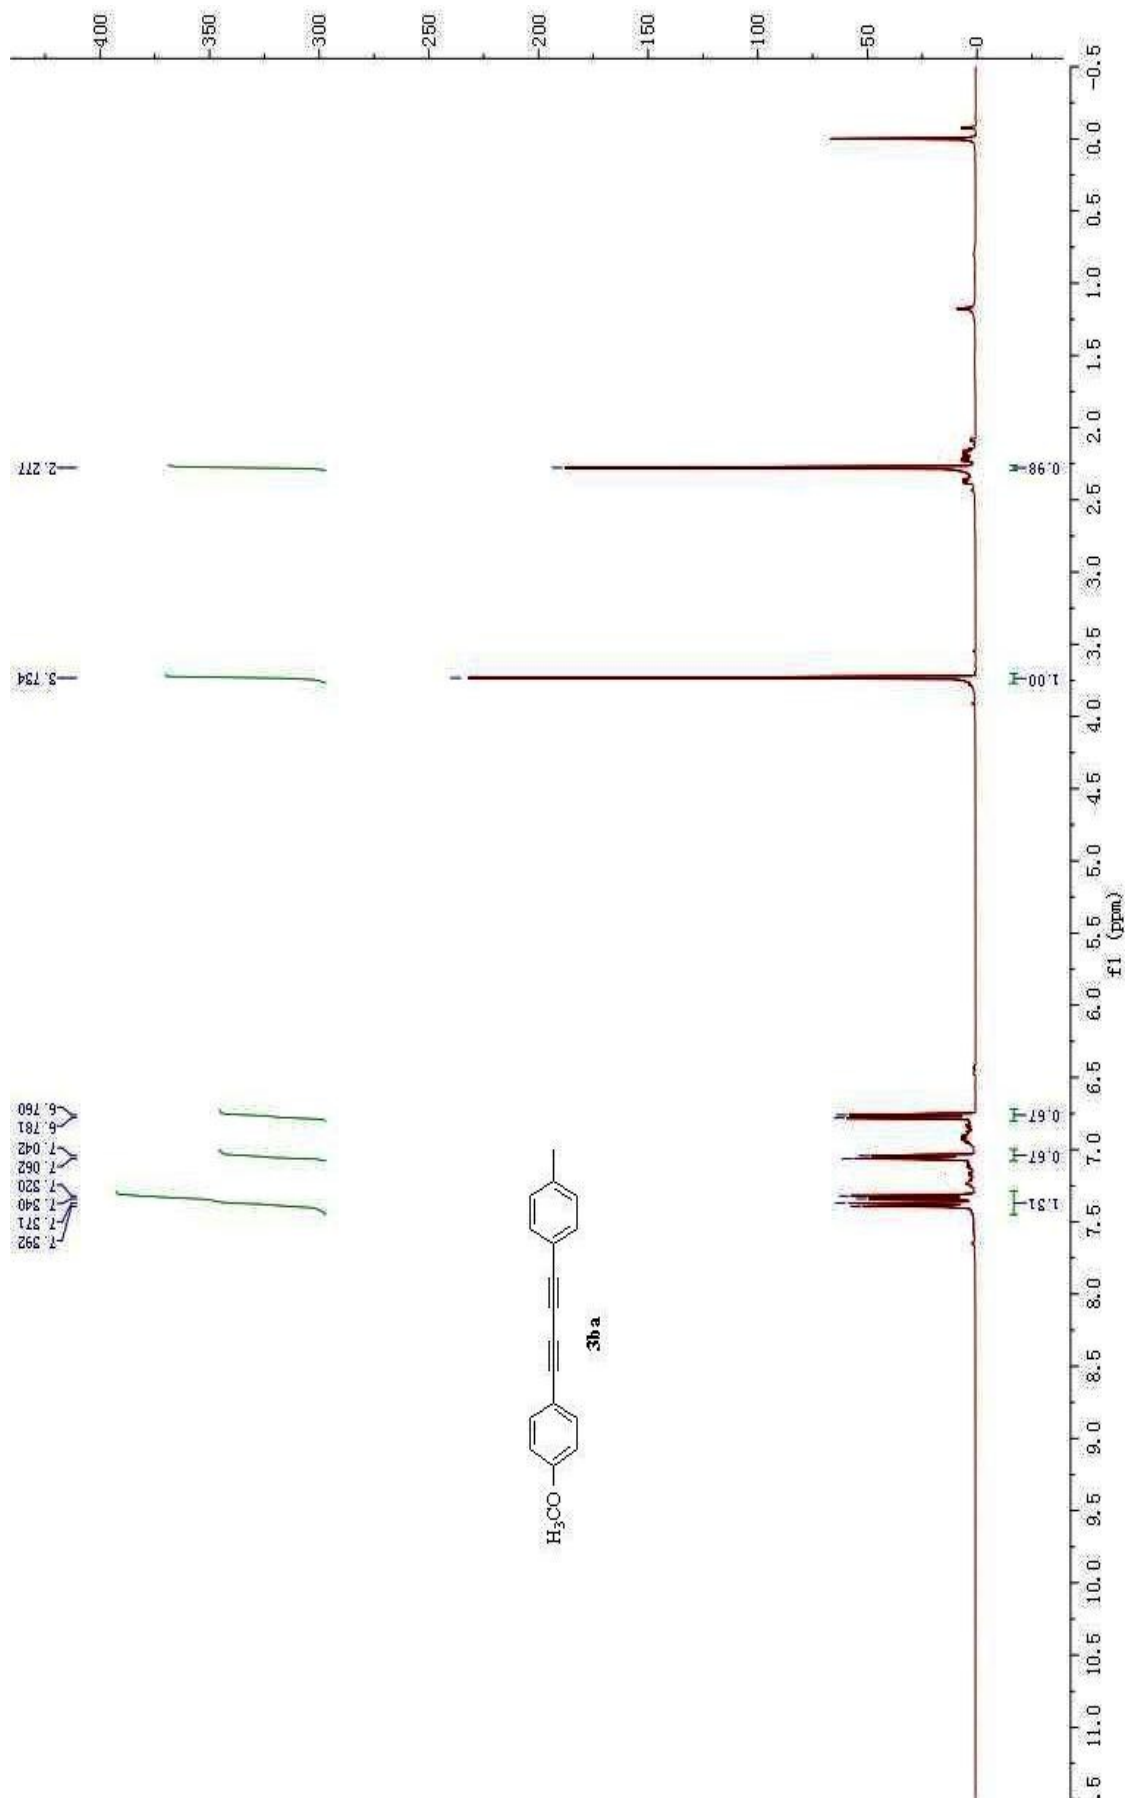

<sup>13</sup>C NMR Spectrum of 1-methoxy-4-(4-p-tolylbuta-1,3-diynyl)benzene (**3ba**)

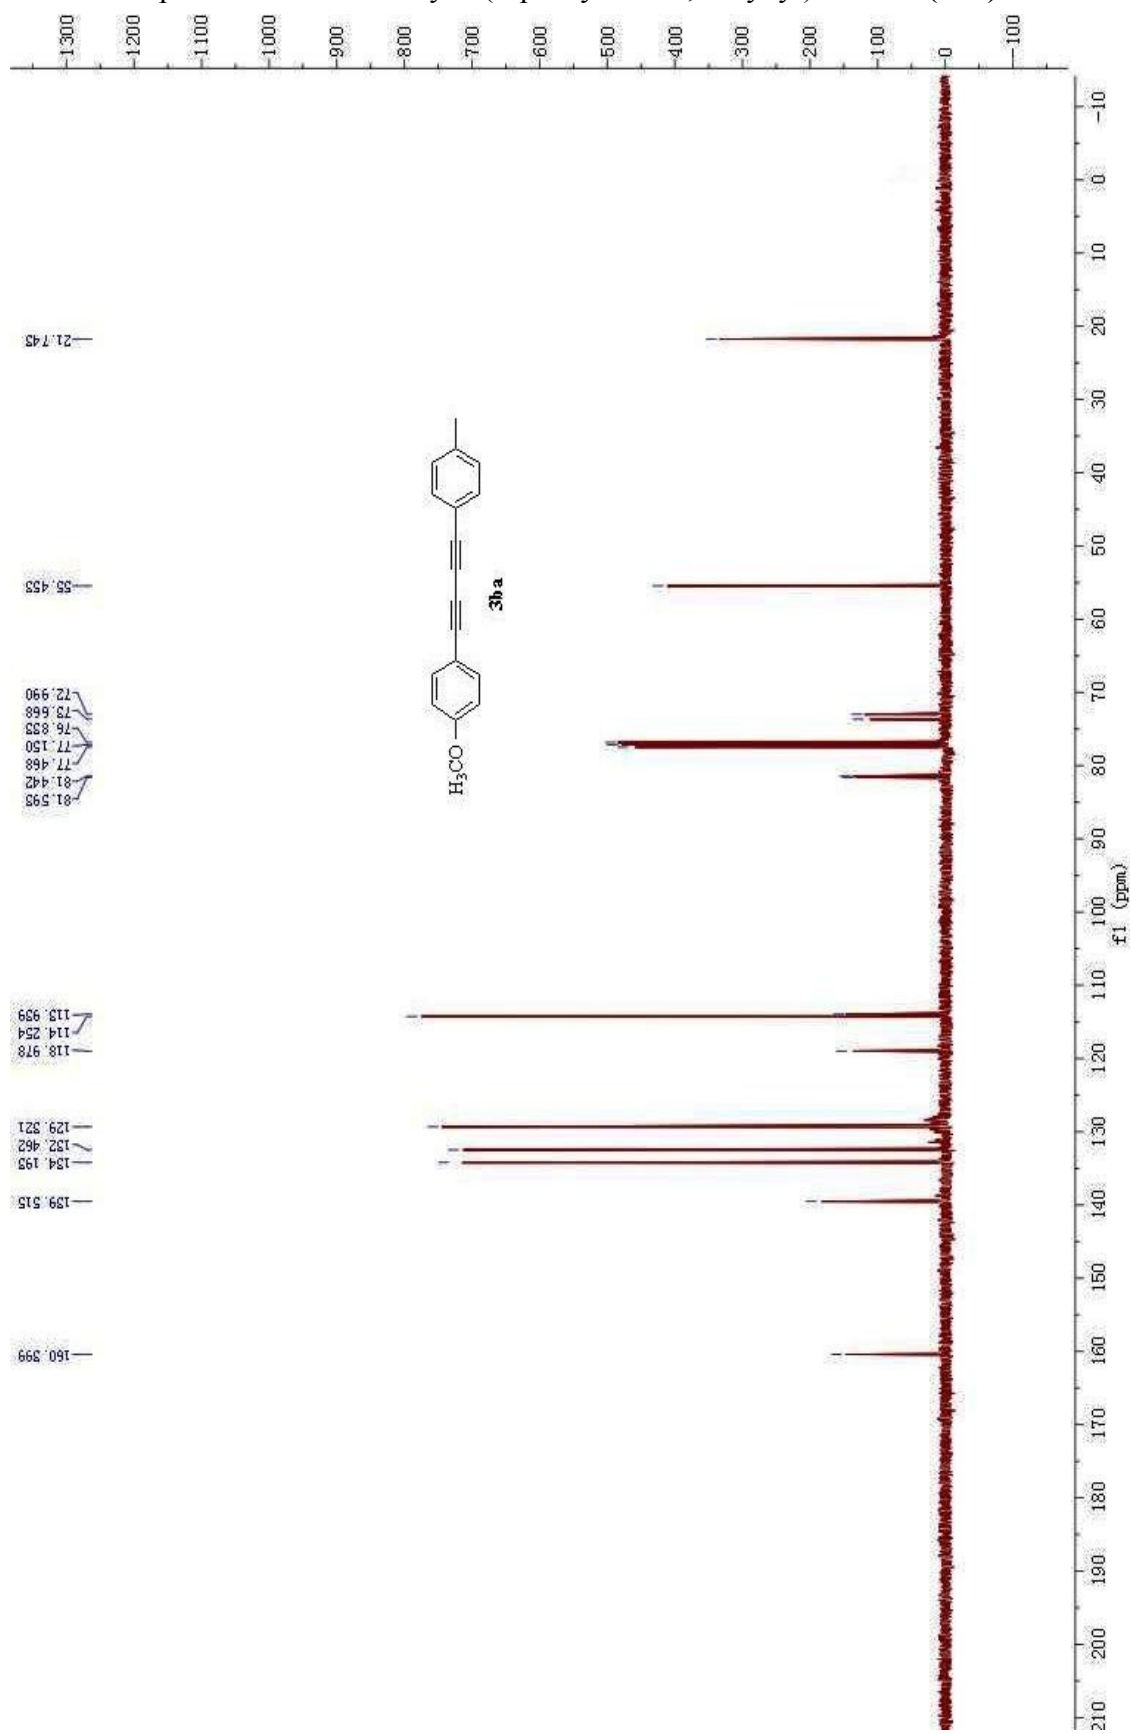

<sup>1</sup>H NMR Spectrum of 1-(4-(4-chlorophenyl)buta-1,3-diynyl)-4-methoxybenzene (**3bh**)

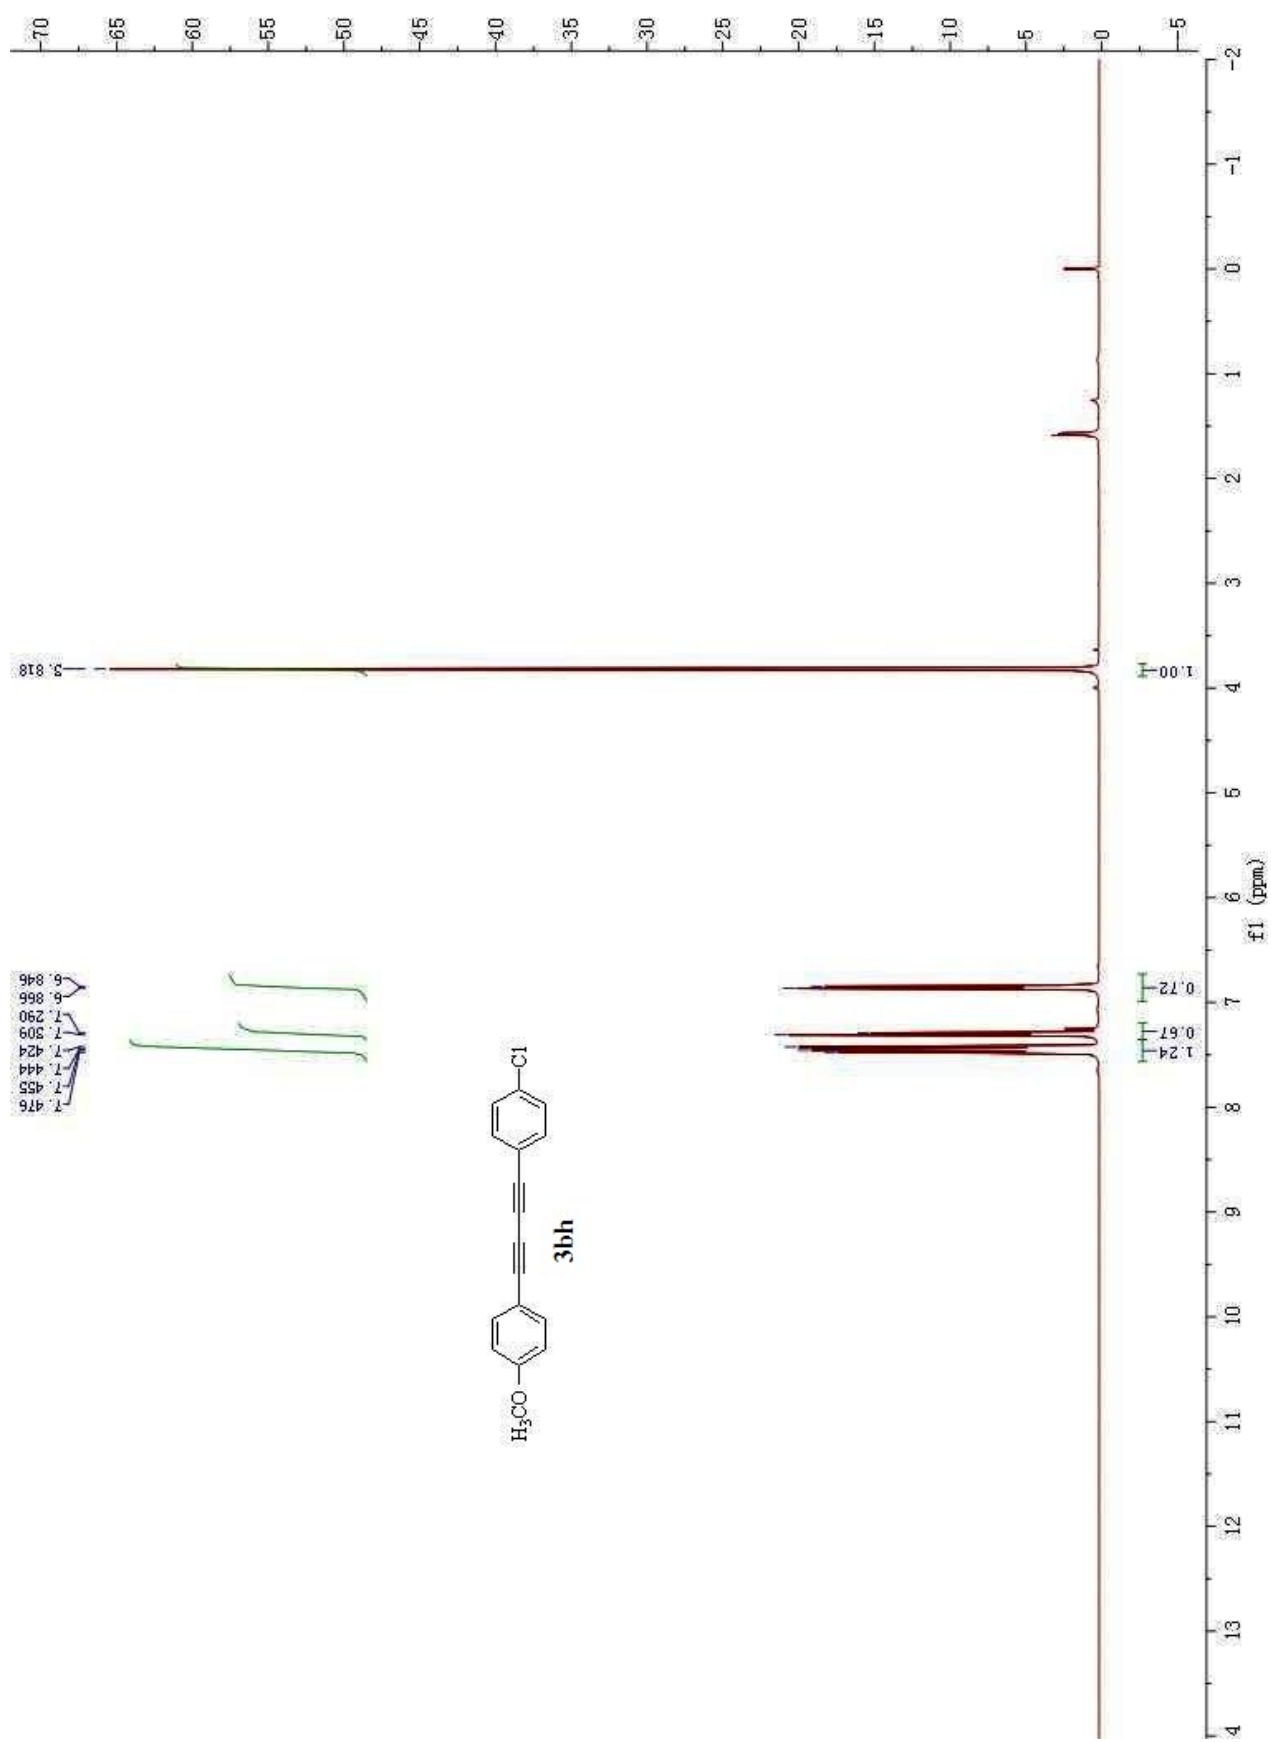

<sup>13</sup>C NMR Spectrum of 1-(4-(4-chlorophenyl)buta-1,3-diynyl)-4-methoxybenzene (**3bh**)

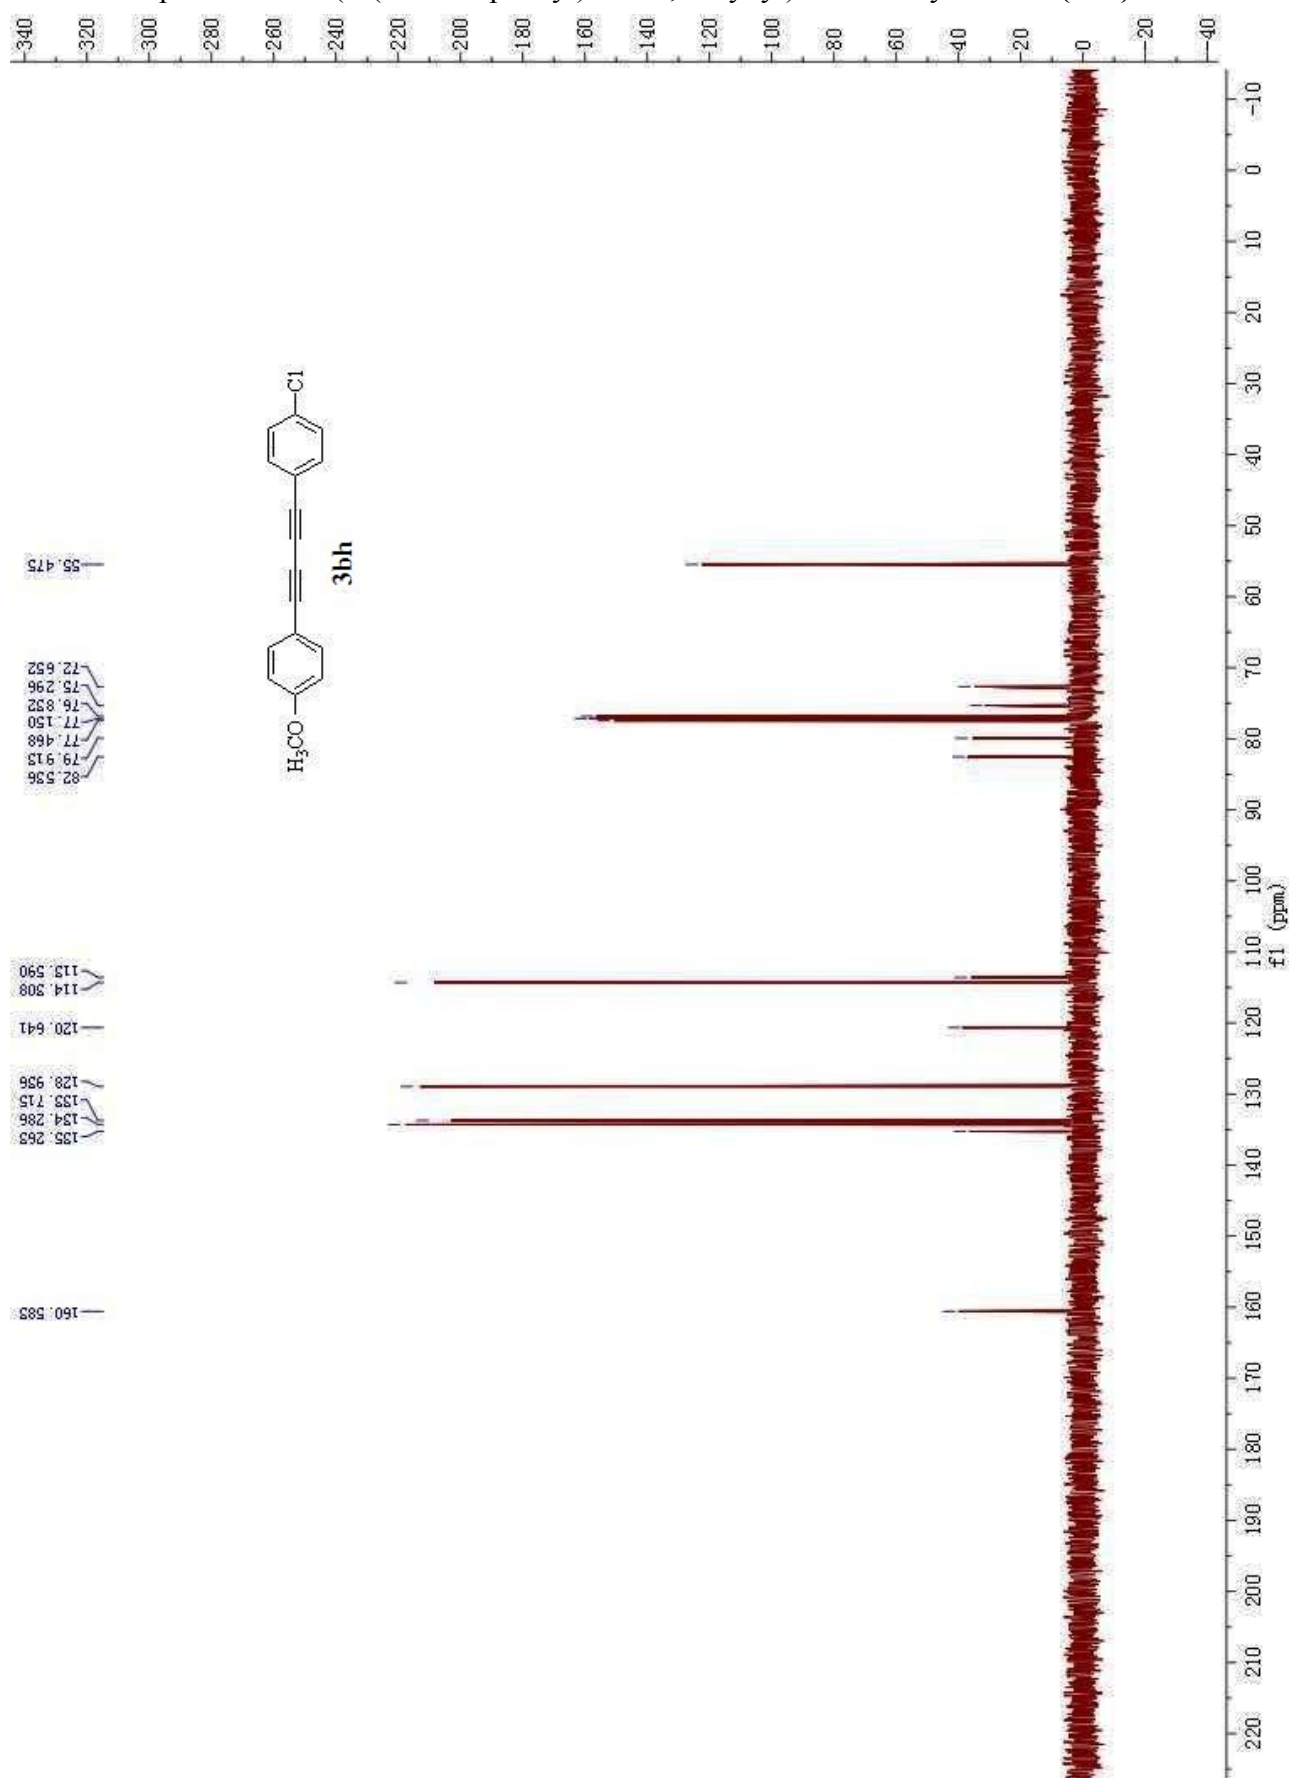

<sup>1</sup>H NMR Spectrum of 1-(4-(4-fluorophenyl)buta-1,3-diynyl)-4-methoxybenzene (**3bi**)

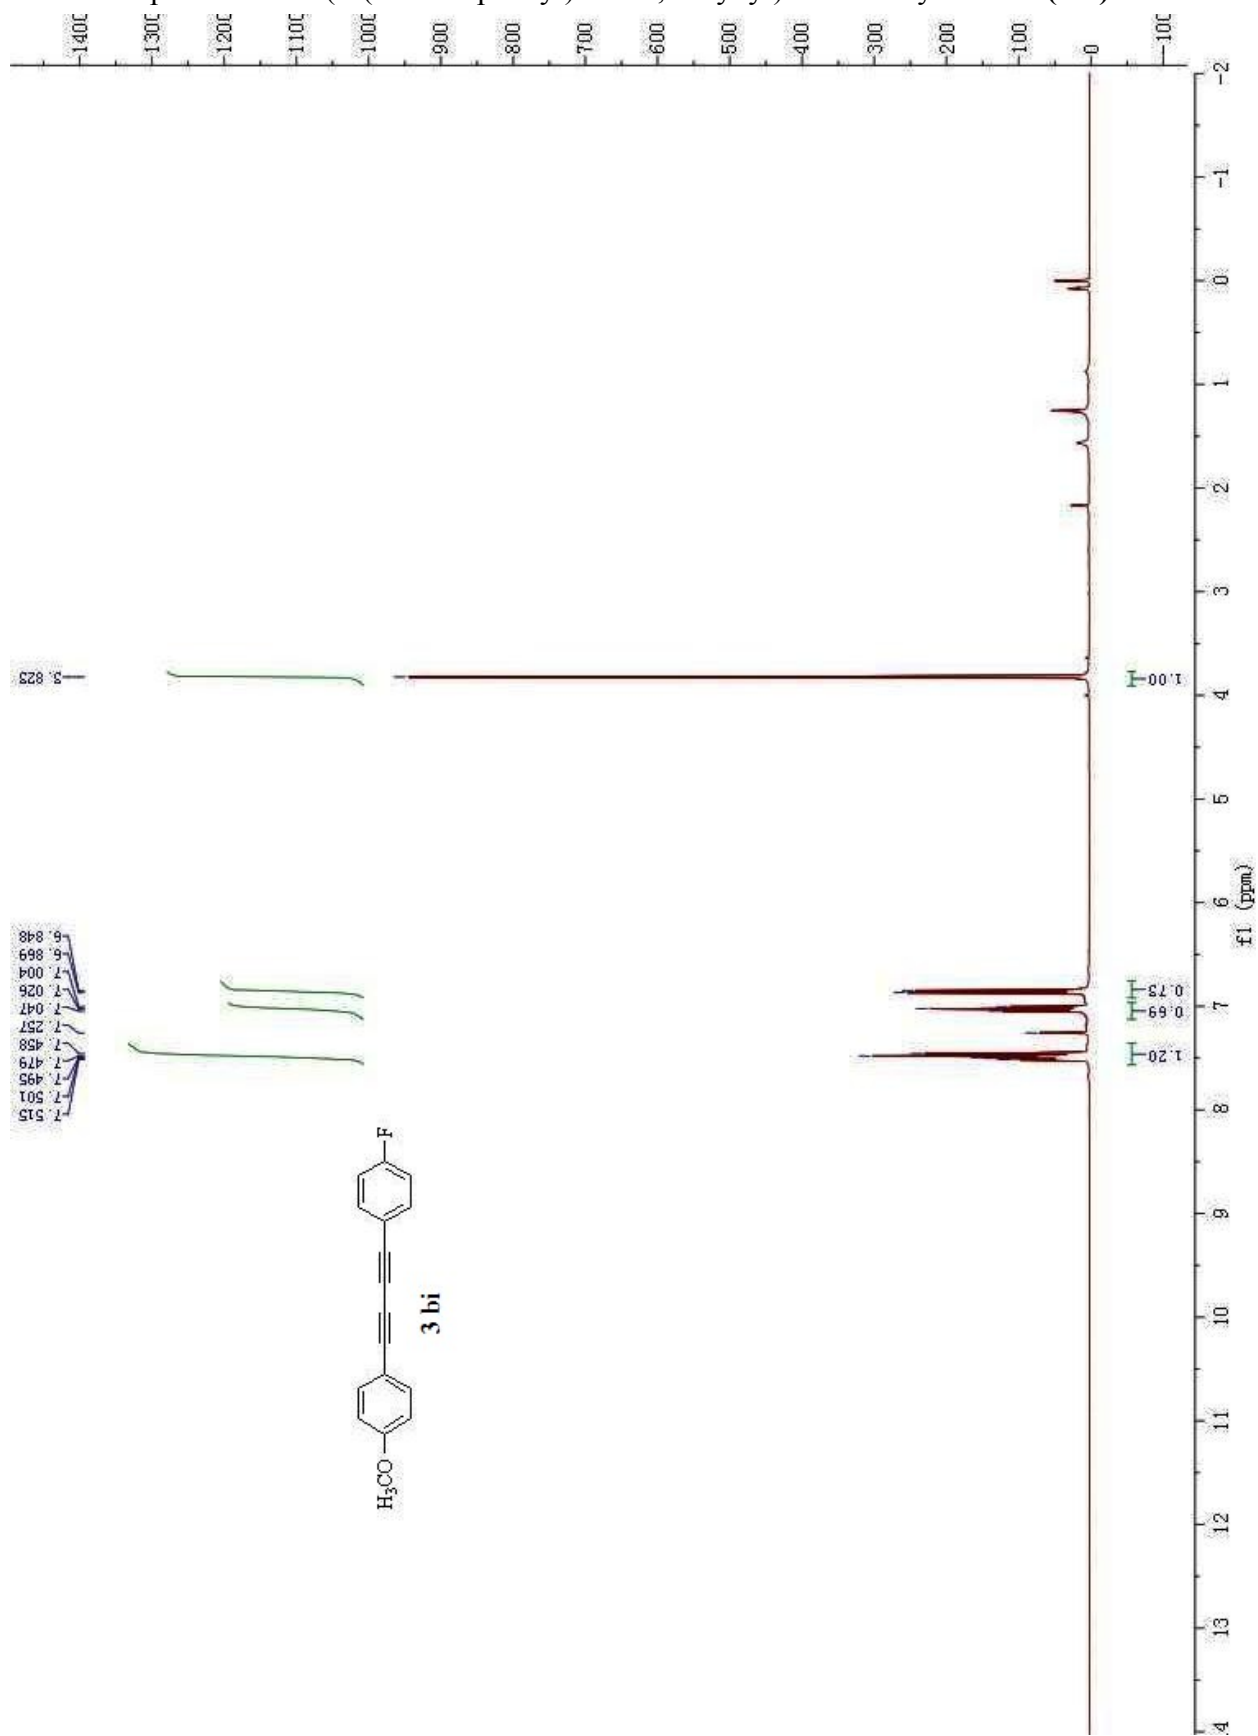

<sup>13</sup>C NMR Spectrum of 1-(4-(4-fluorophenyl)buta-1,3-diynyl)-4-methoxybenzene (**3bi**)

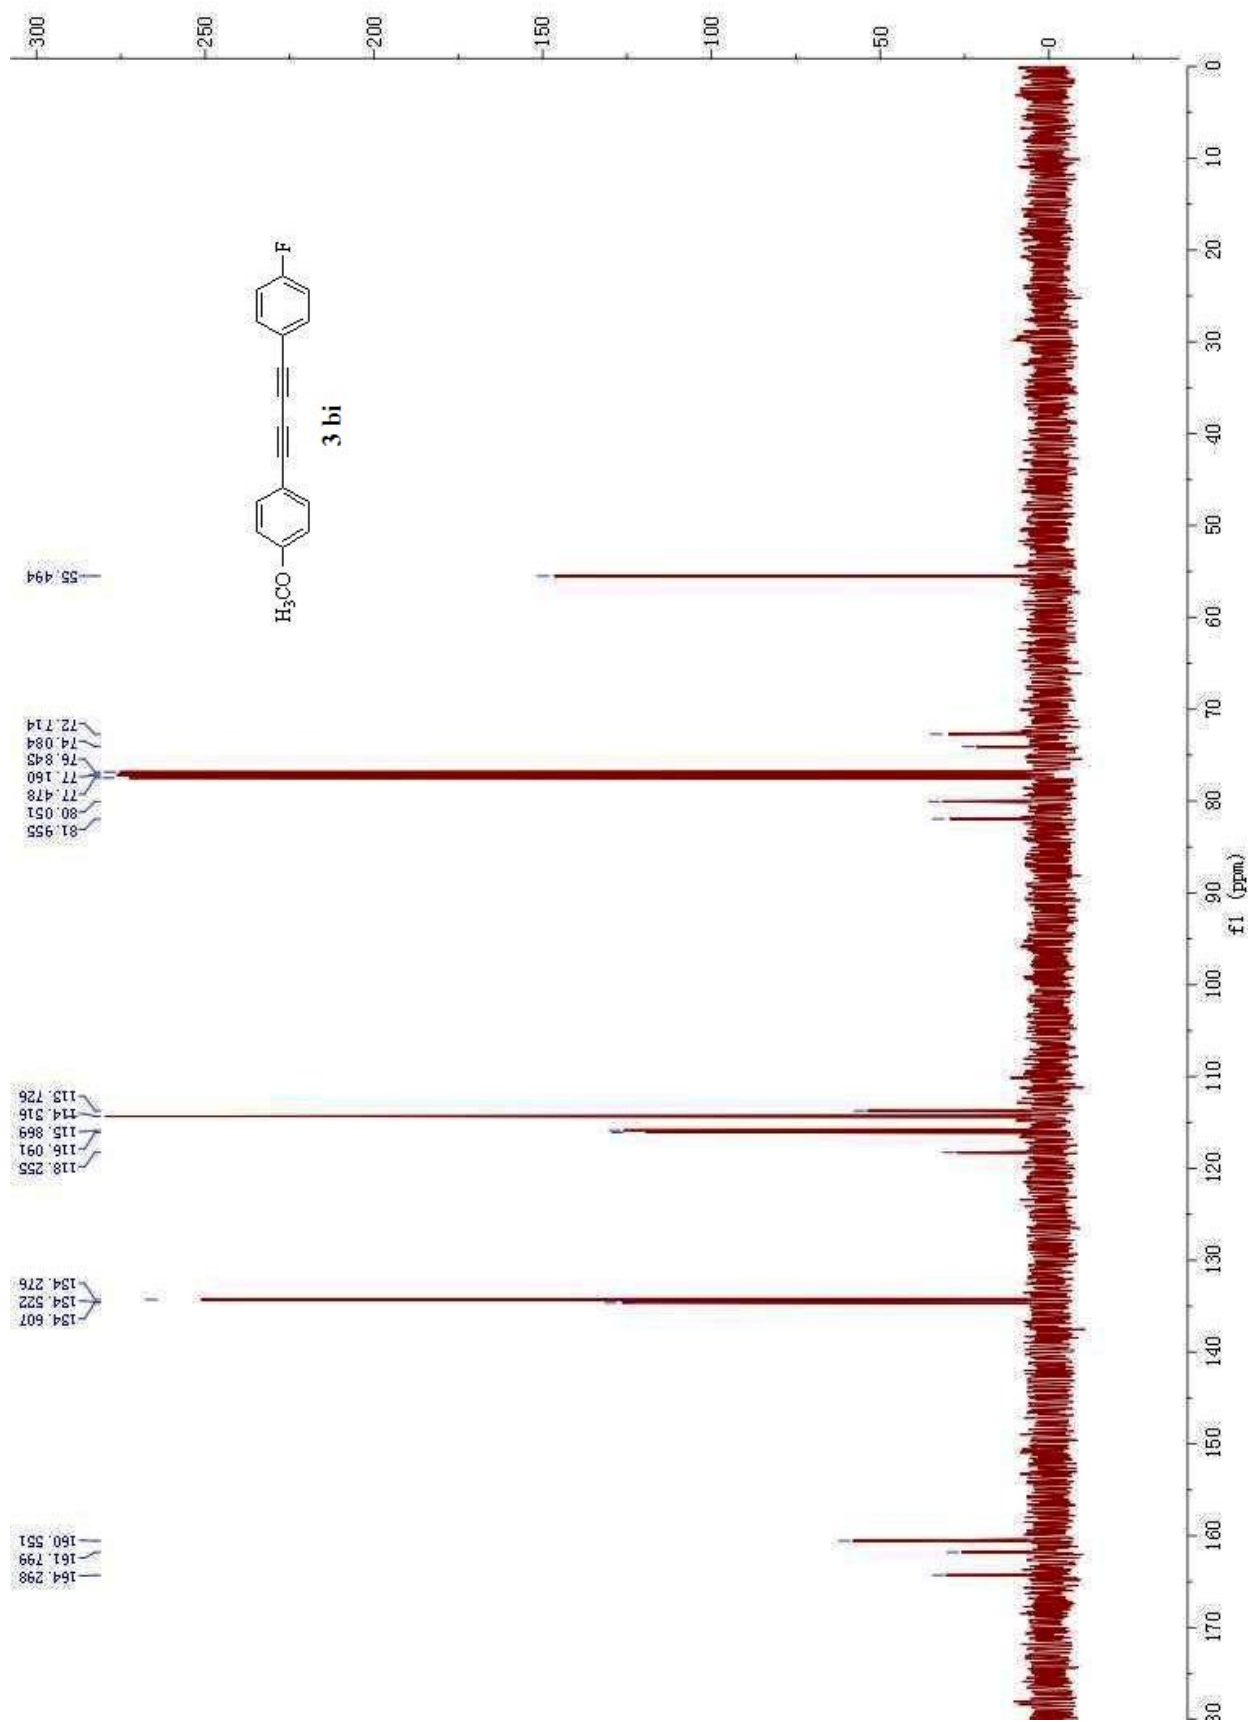

<sup>1</sup>H NMR Spectrum of 1-(4-(3-fluorophenyl)buta-1,3-dienyl)-4-methoxybenzene (**3bj**)

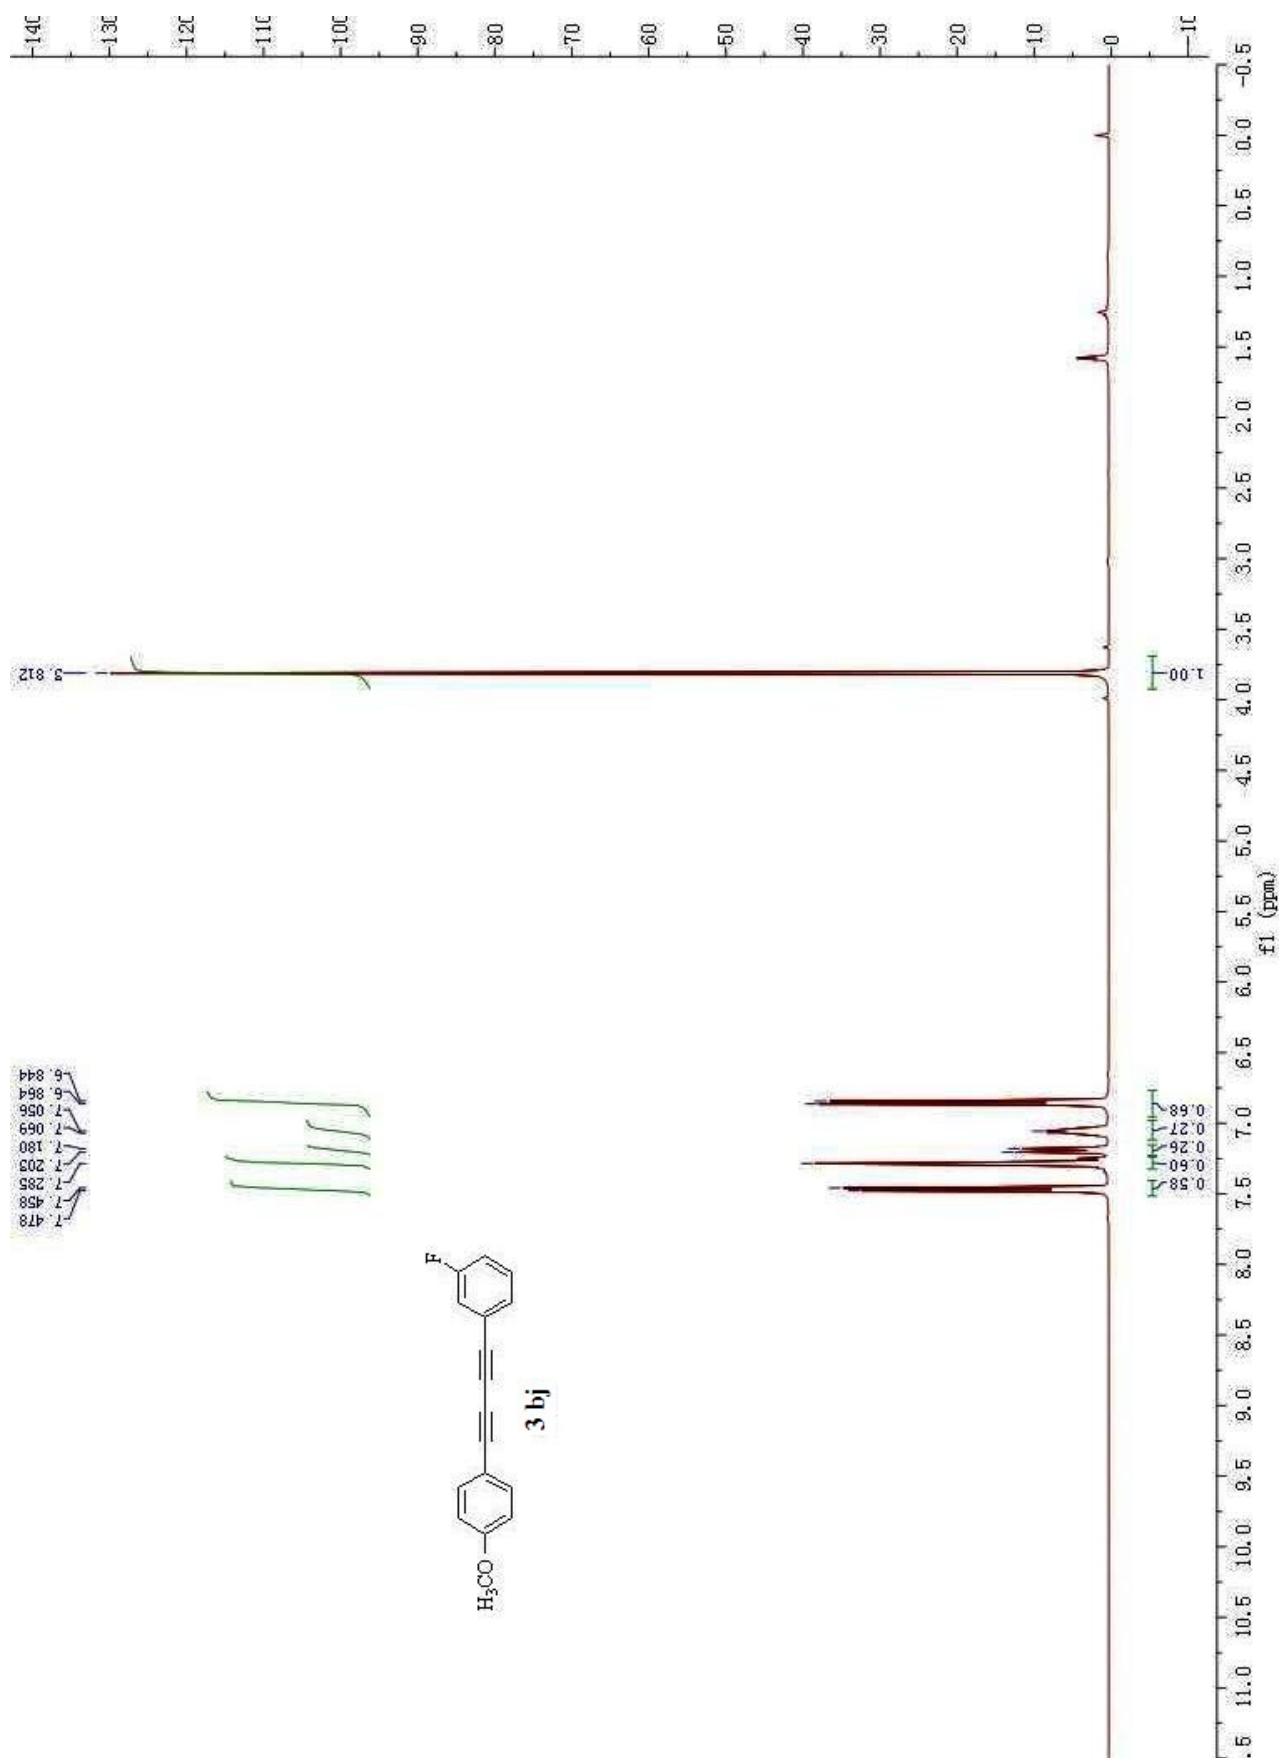



<sup>13</sup>C NMR Spectrum of 1-(4-(3-fluorophenyl)buta-1,3-diynyl)-4-methoxybenzene (**3bj**)

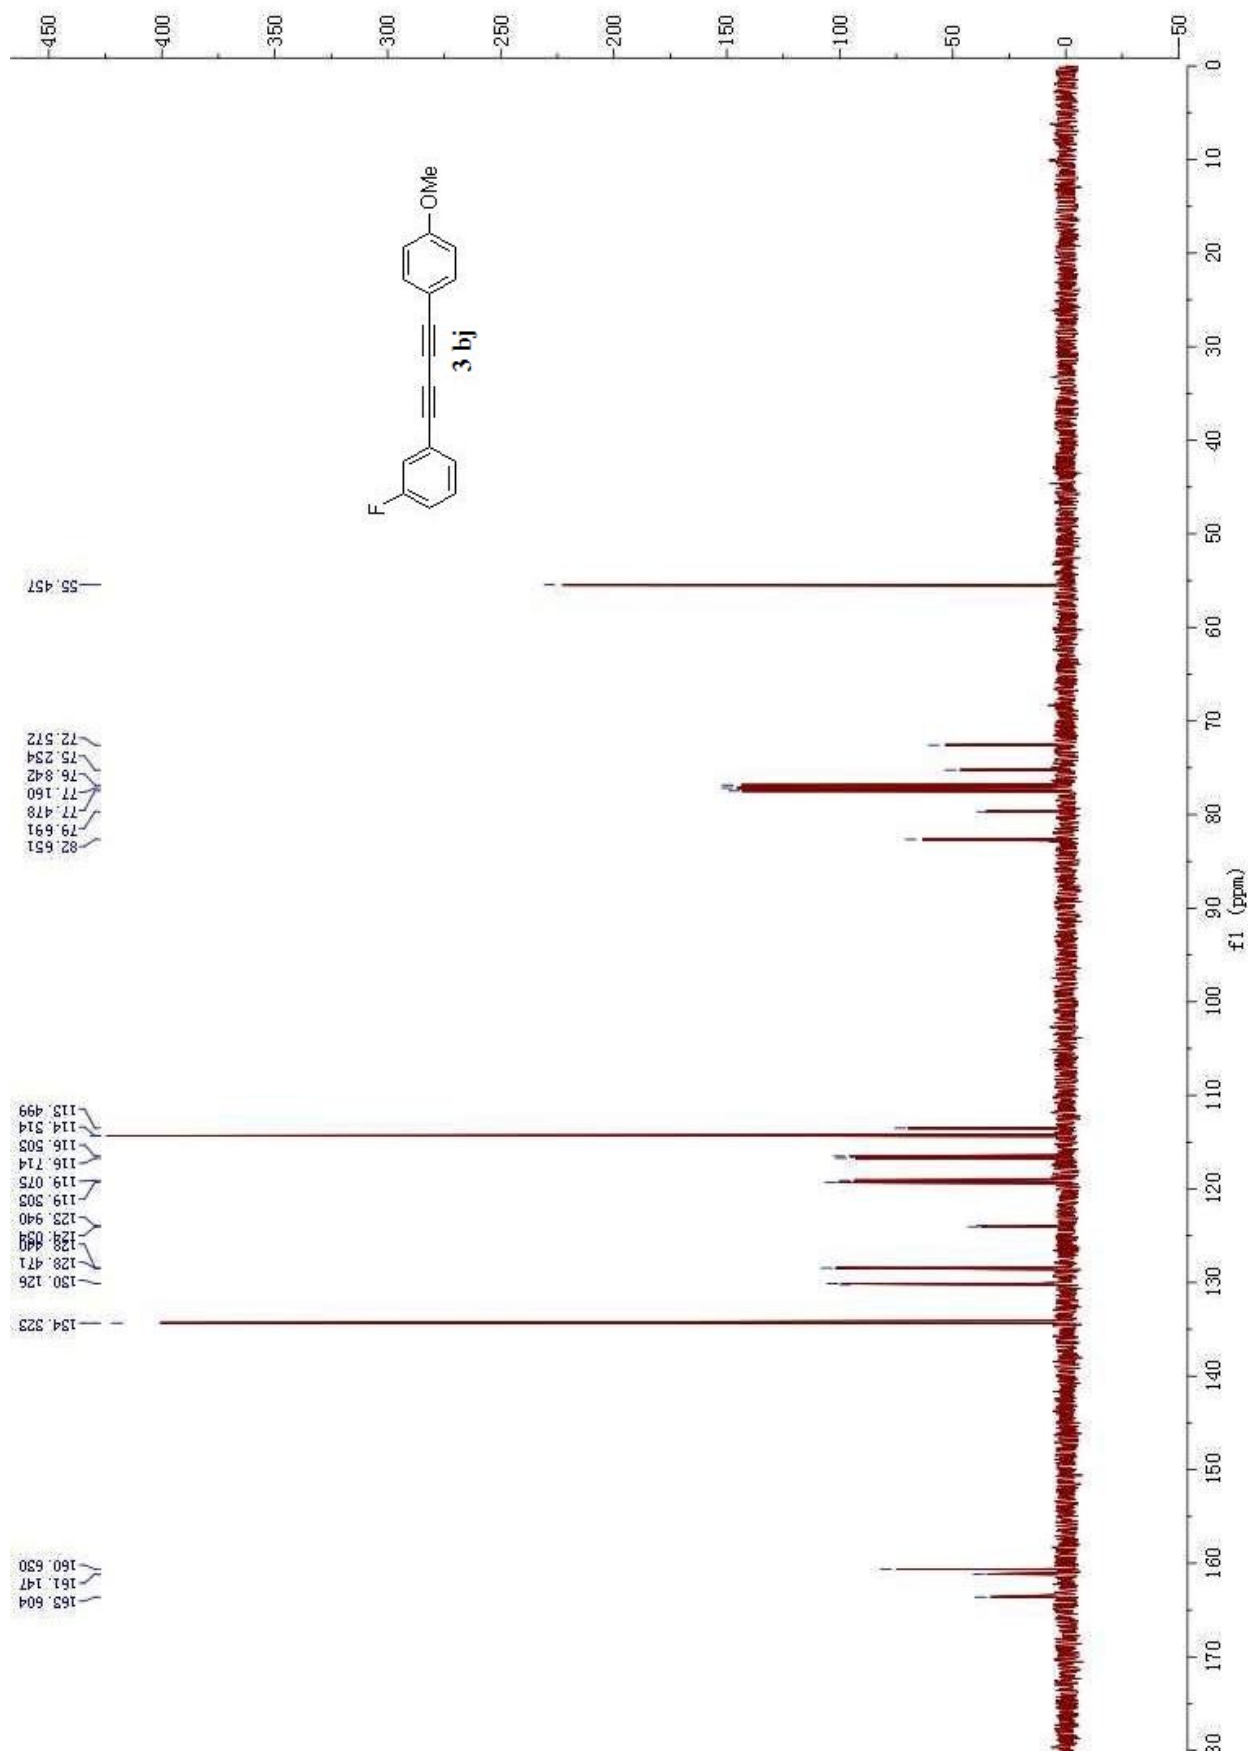

<sup>1</sup>H NMR Spectrum of 2-(4-(4-methoxyphenyl)buta-1,3-diyne)thiophene (**3bn**)

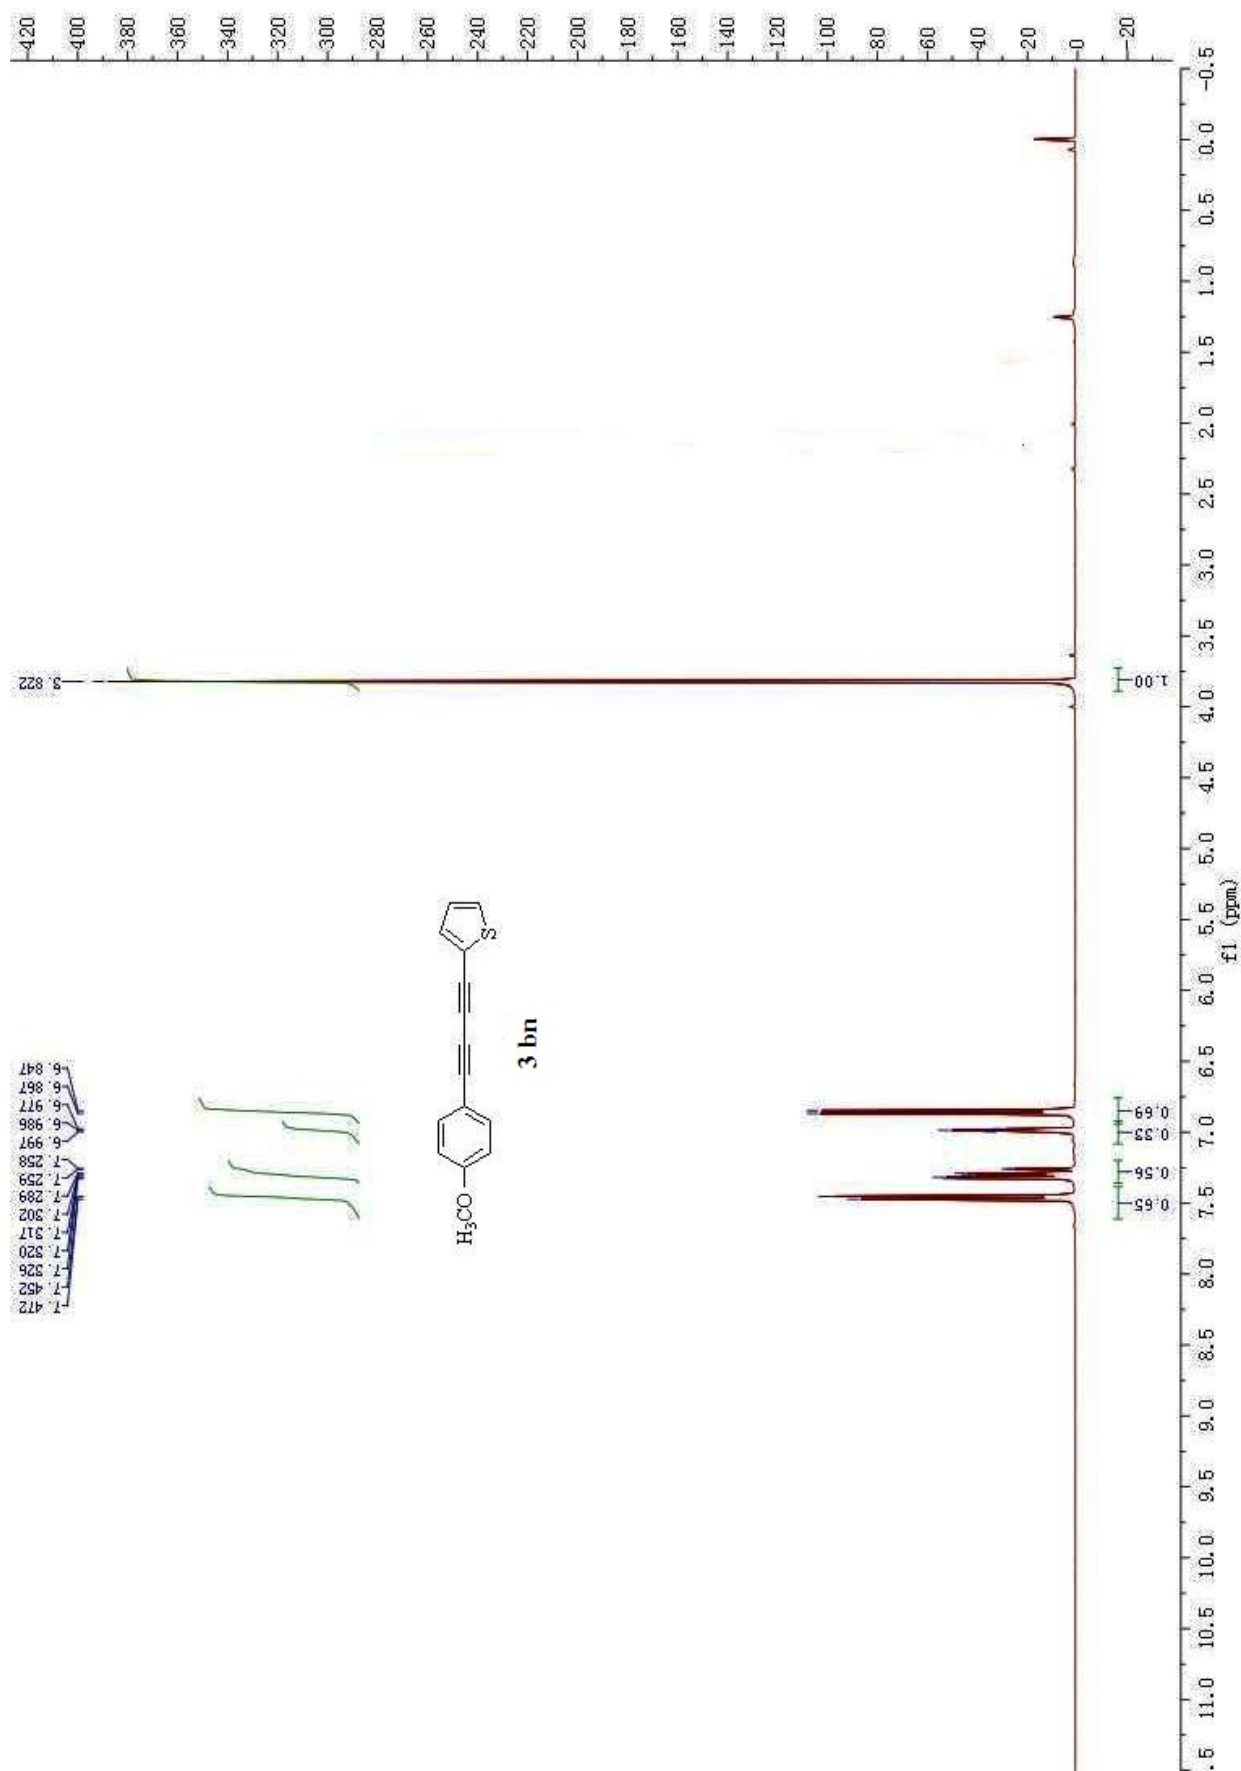

<sup>13</sup>C NMR Spectrum of 2-(4-(4-methoxyphenyl)buta-1,3-diynyl)thiophene (**3bn**)

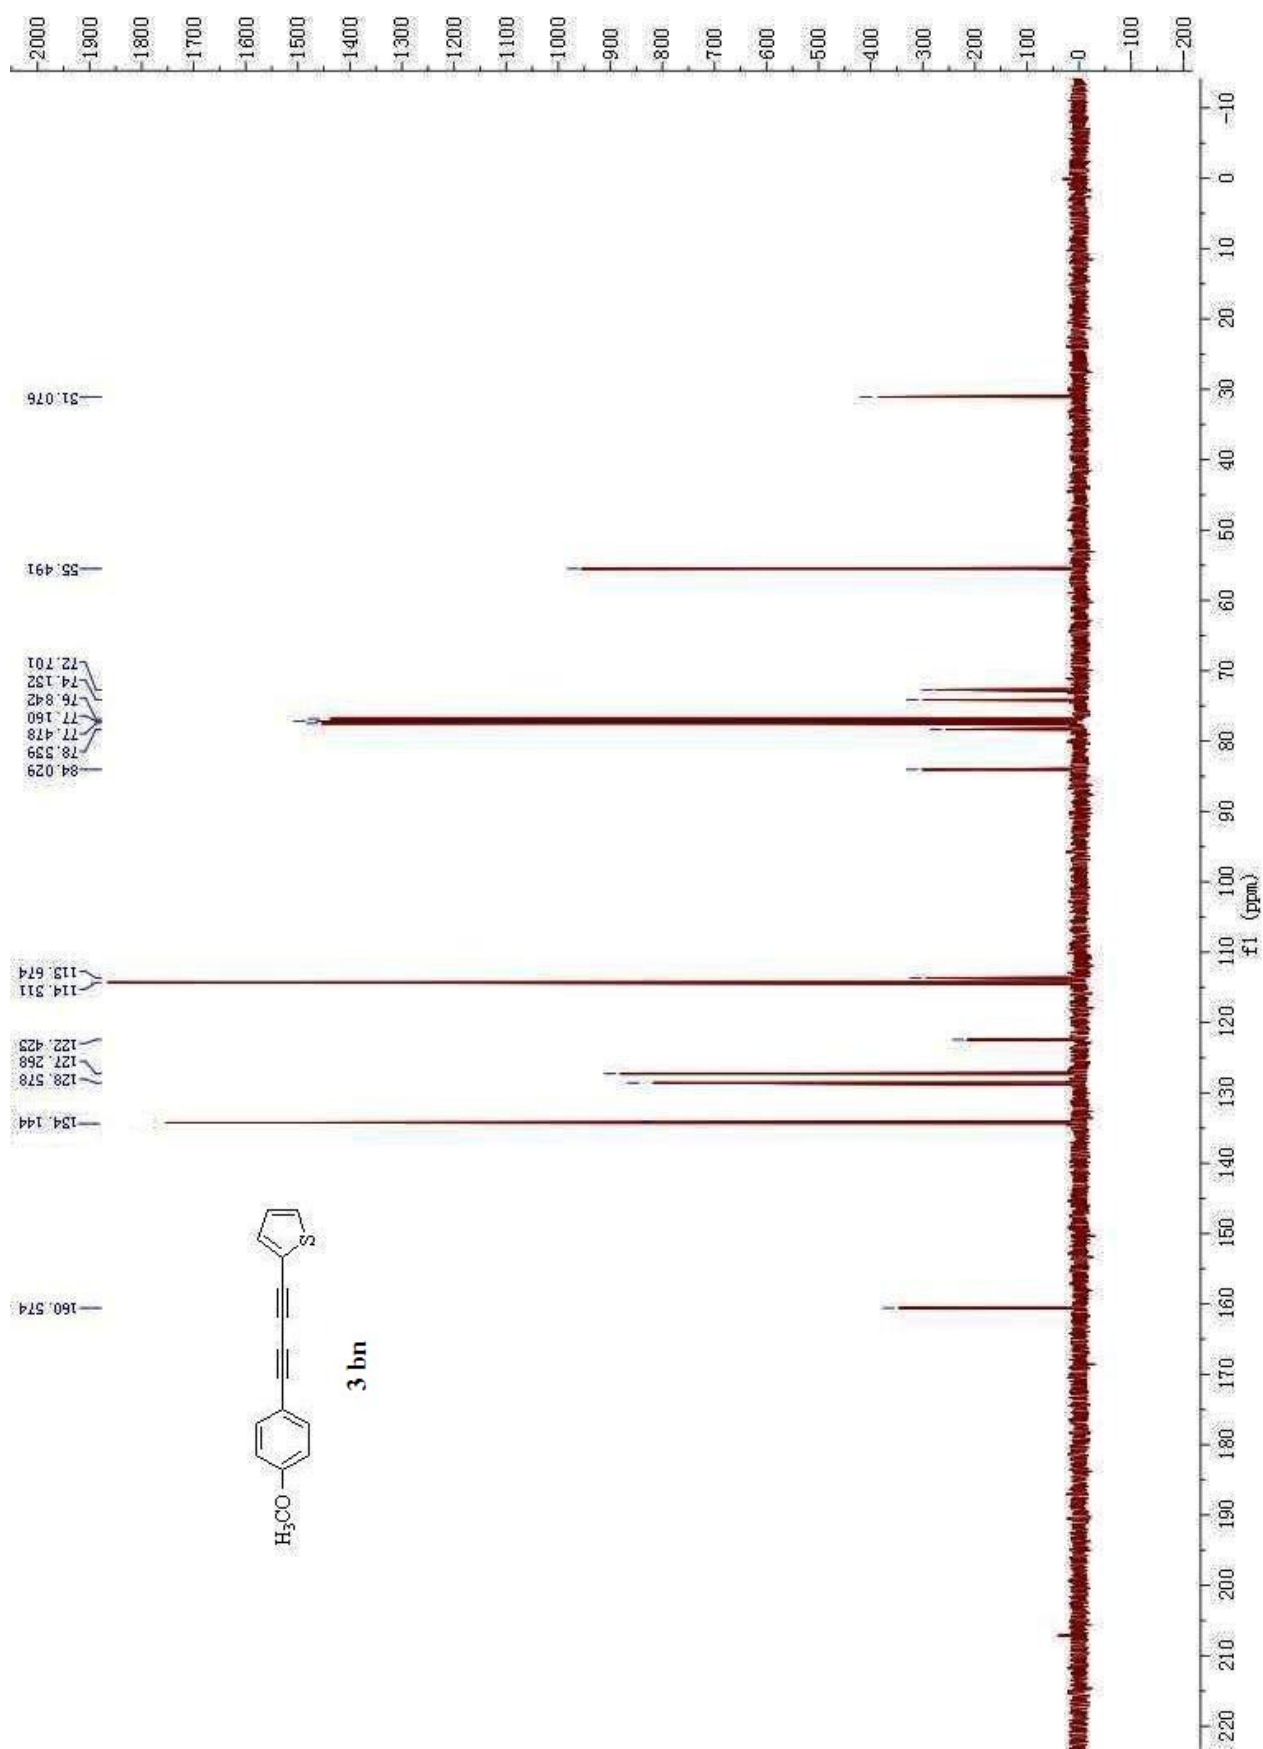

<sup>1</sup>H NMR Spectrum of 4-(3-fluorophenyl)-1-(4-fluorophenyl)buta-1,3-diyne (**3cj**)

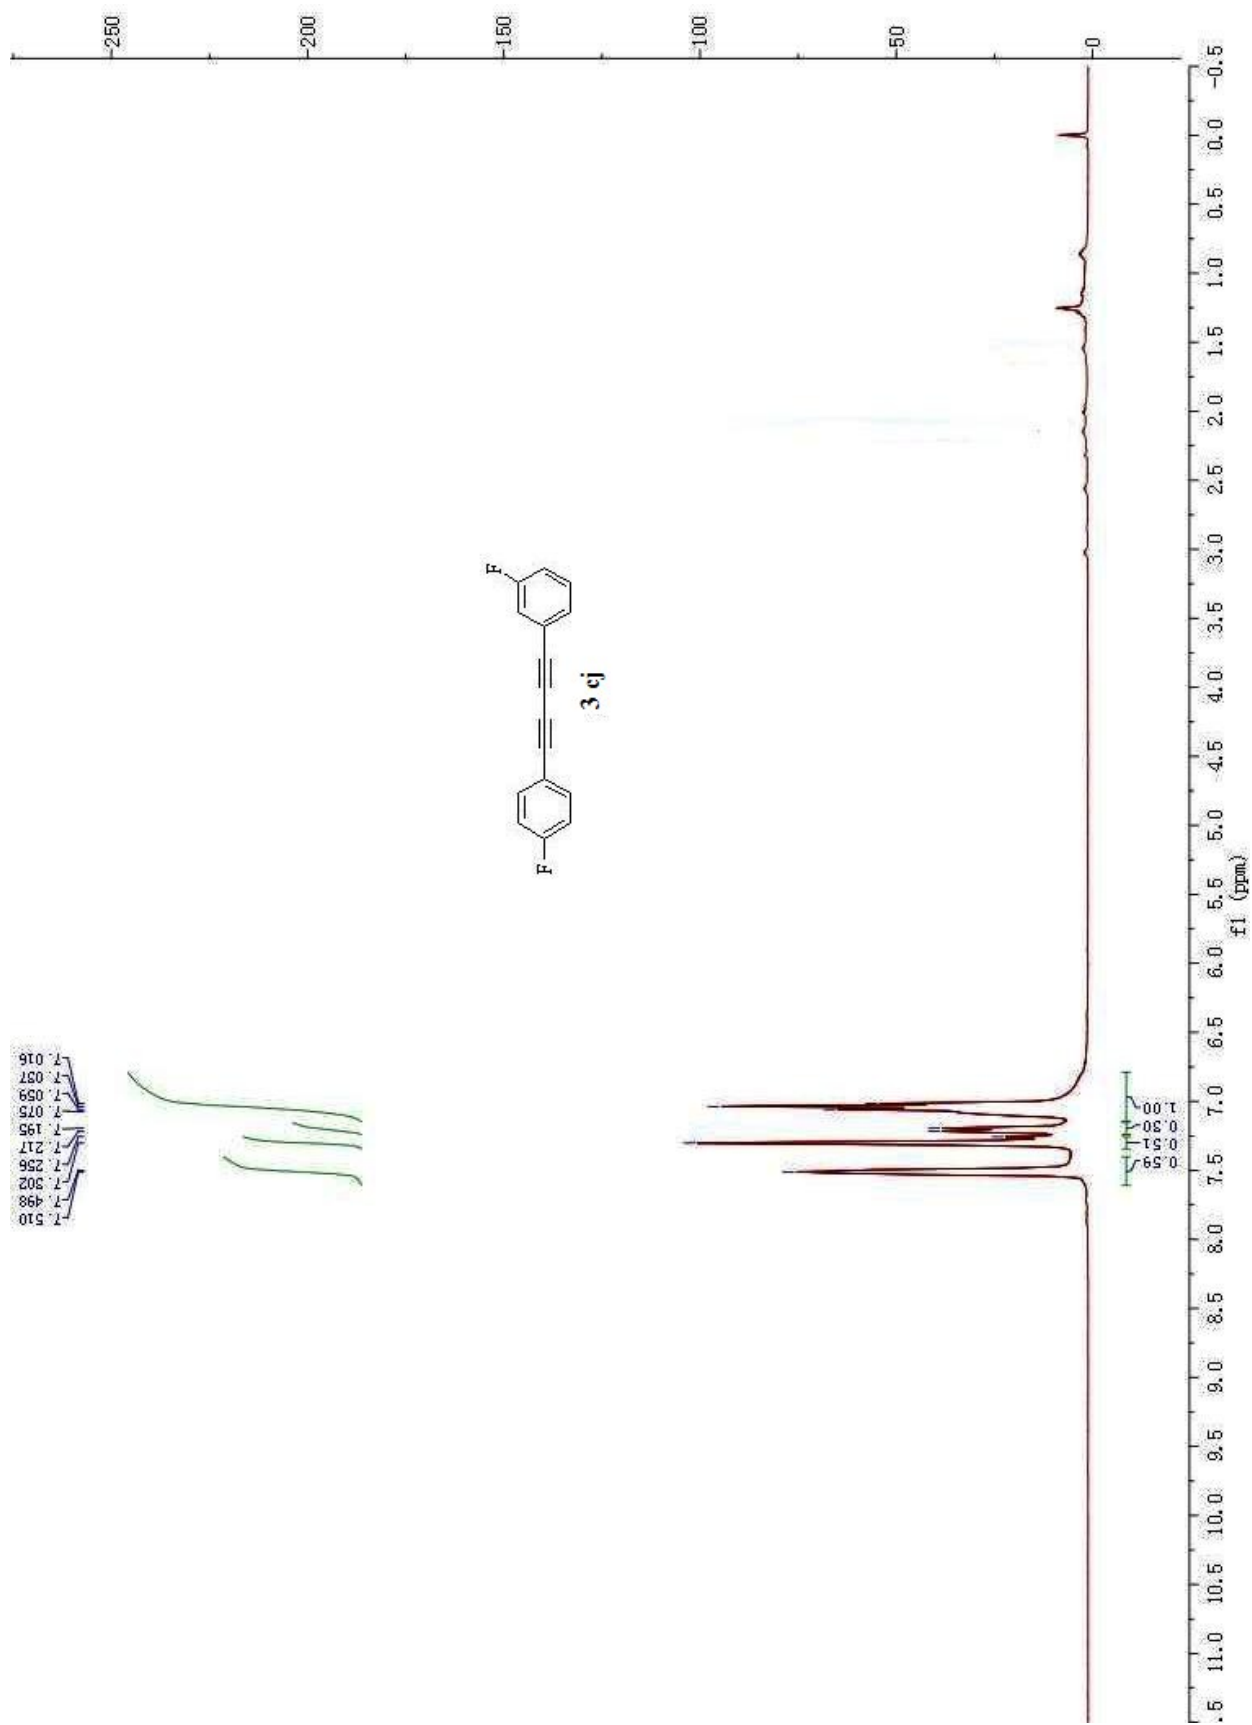

<sup>13</sup>C NMR Spectrum of 4-(3-fluorophenyl)-1-(4-fluorophenyl)buta-1,3-diyne (**3cj**)

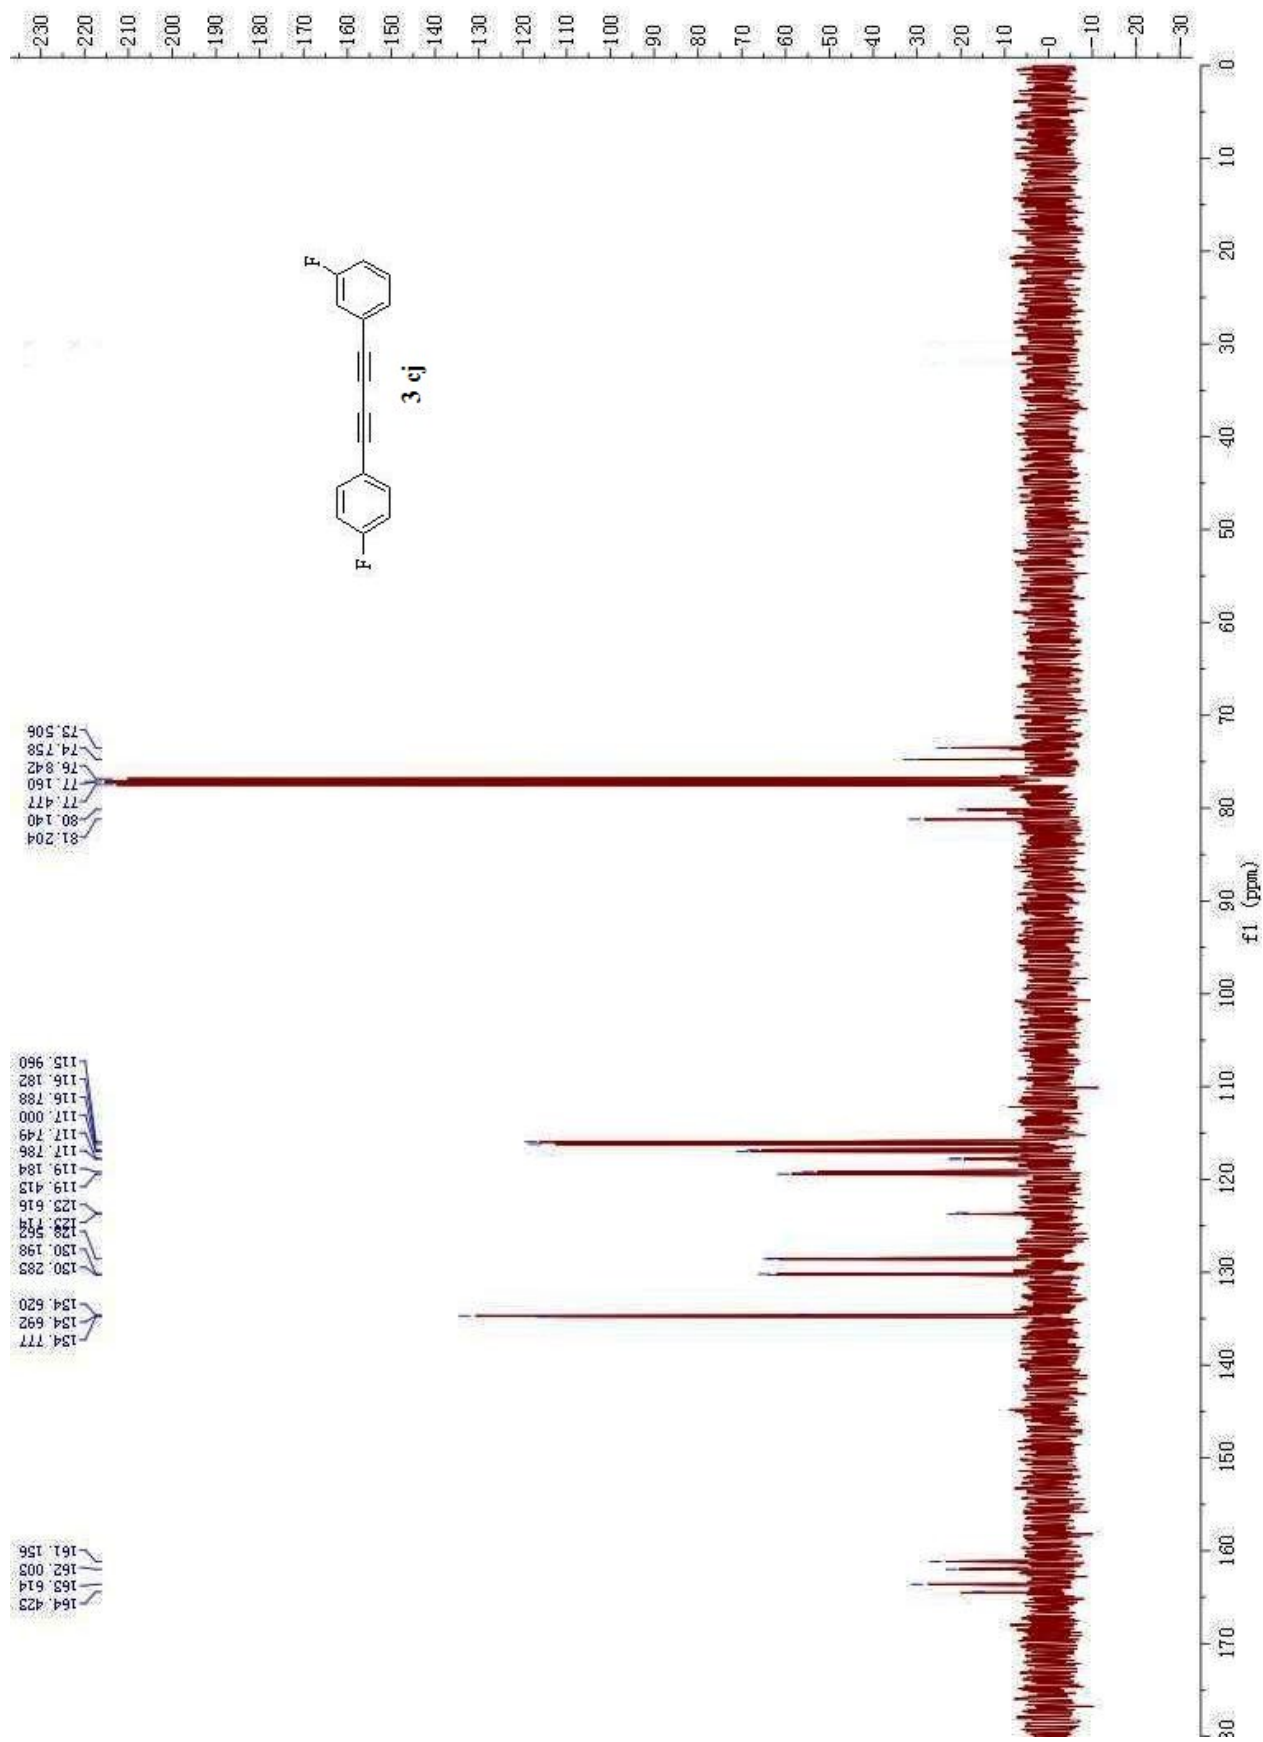

<sup>1</sup>H NMR Spectrum of 4-(2-fluorophenyl)-1-(4-fluorophenyl)buta-1,3-diyne (**3ck**)

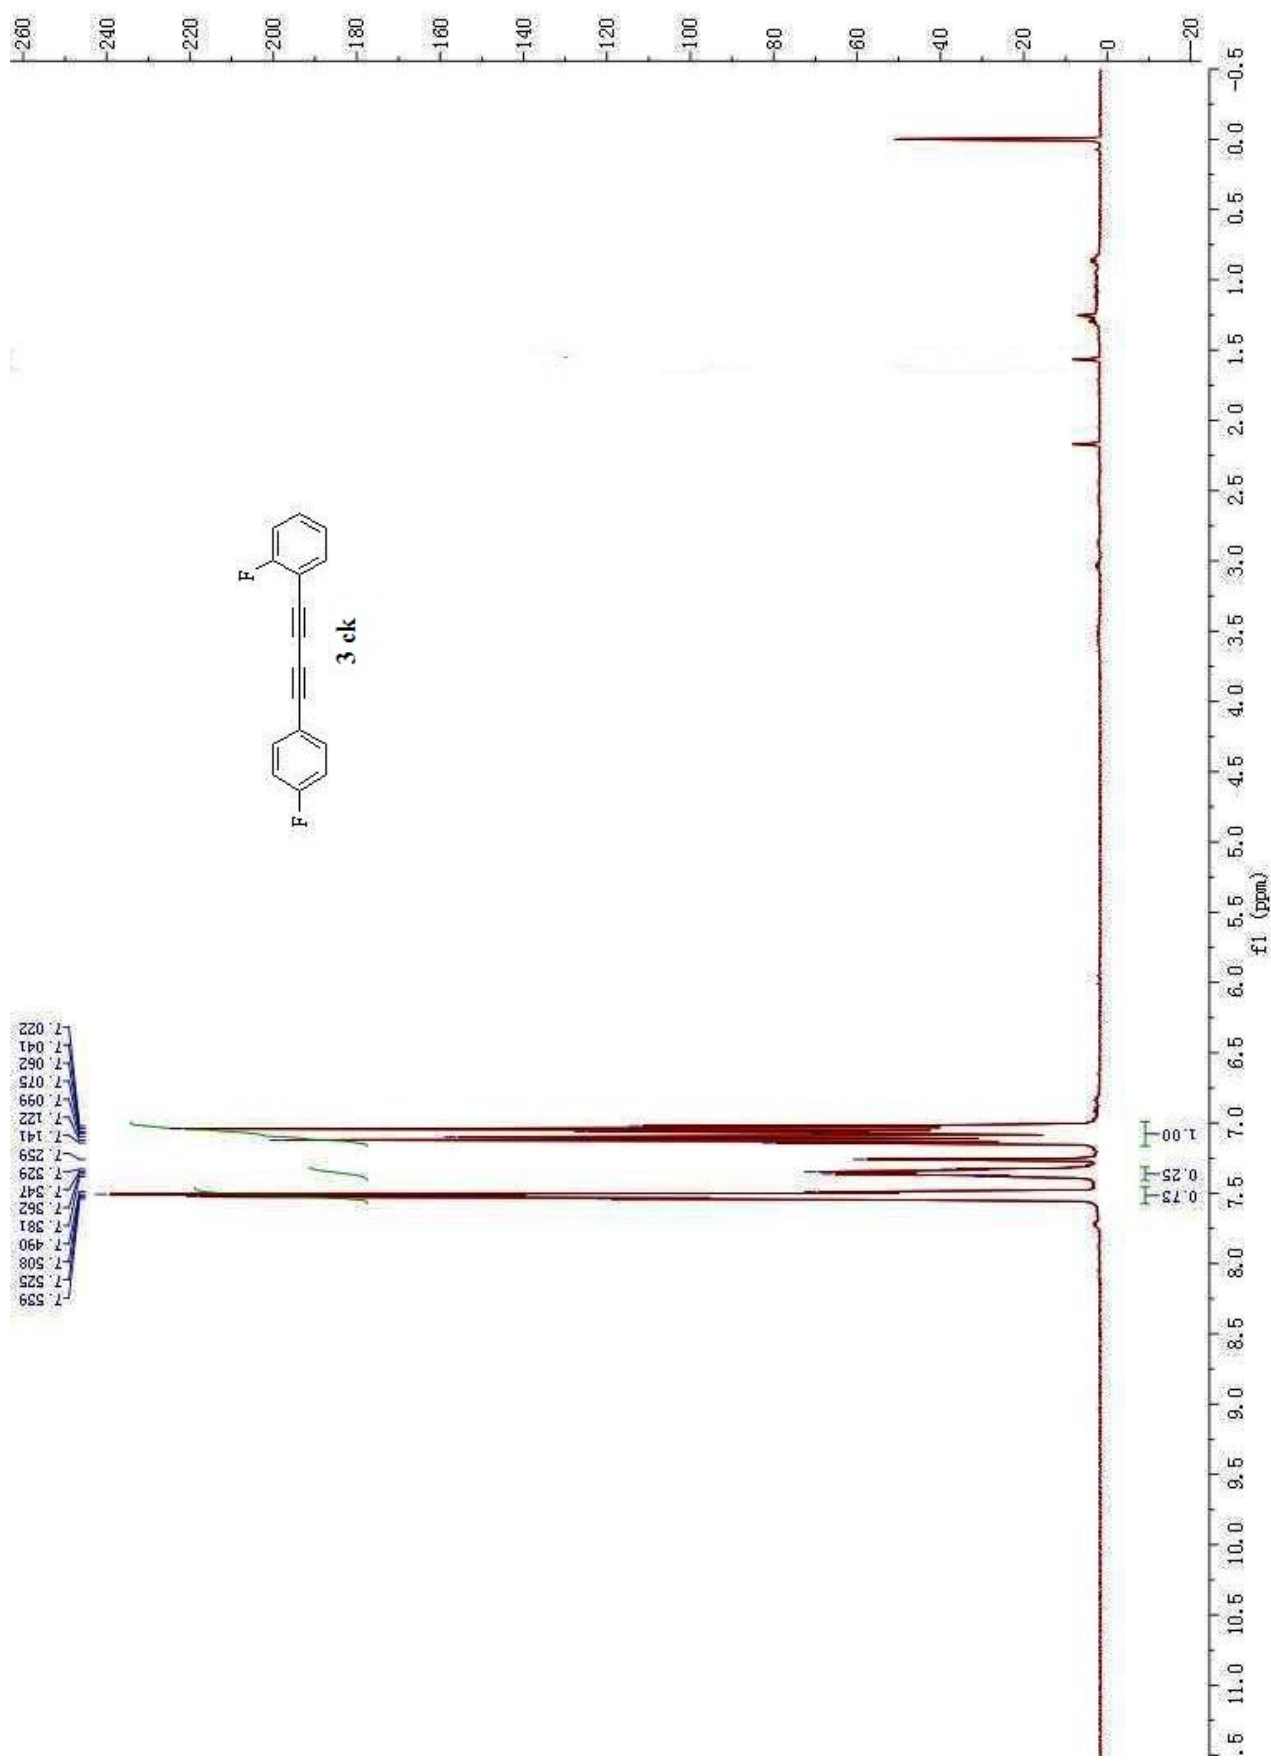

<sup>13</sup>C NMR Spectrum of 4-(2-fluorophenyl)-1-(4-fluorophenyl)buta-1,3-diyne (**3ck**)

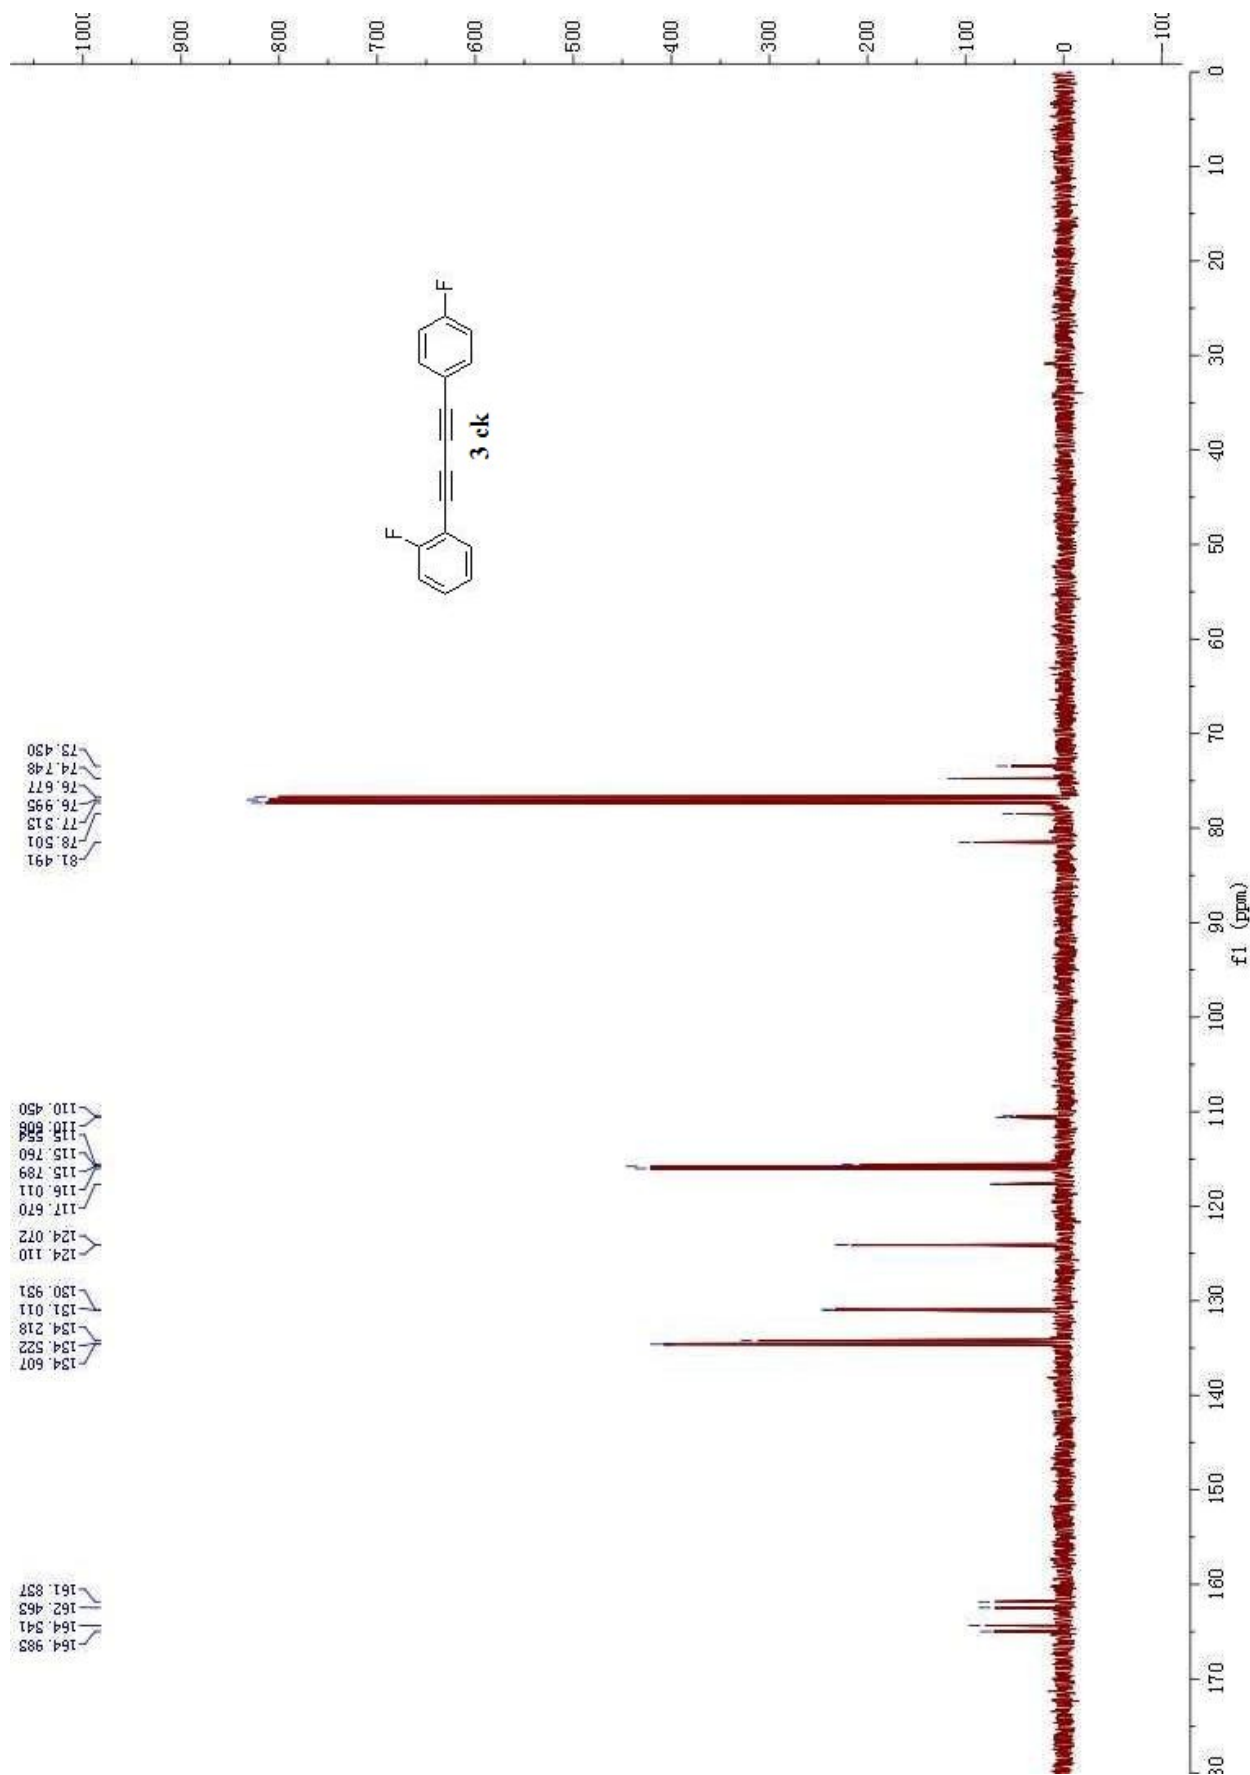

<sup>1</sup>H NMR Spectrum of 1-fluoro-4-(nona-1,3-diynyl)benzene (**3cp**)

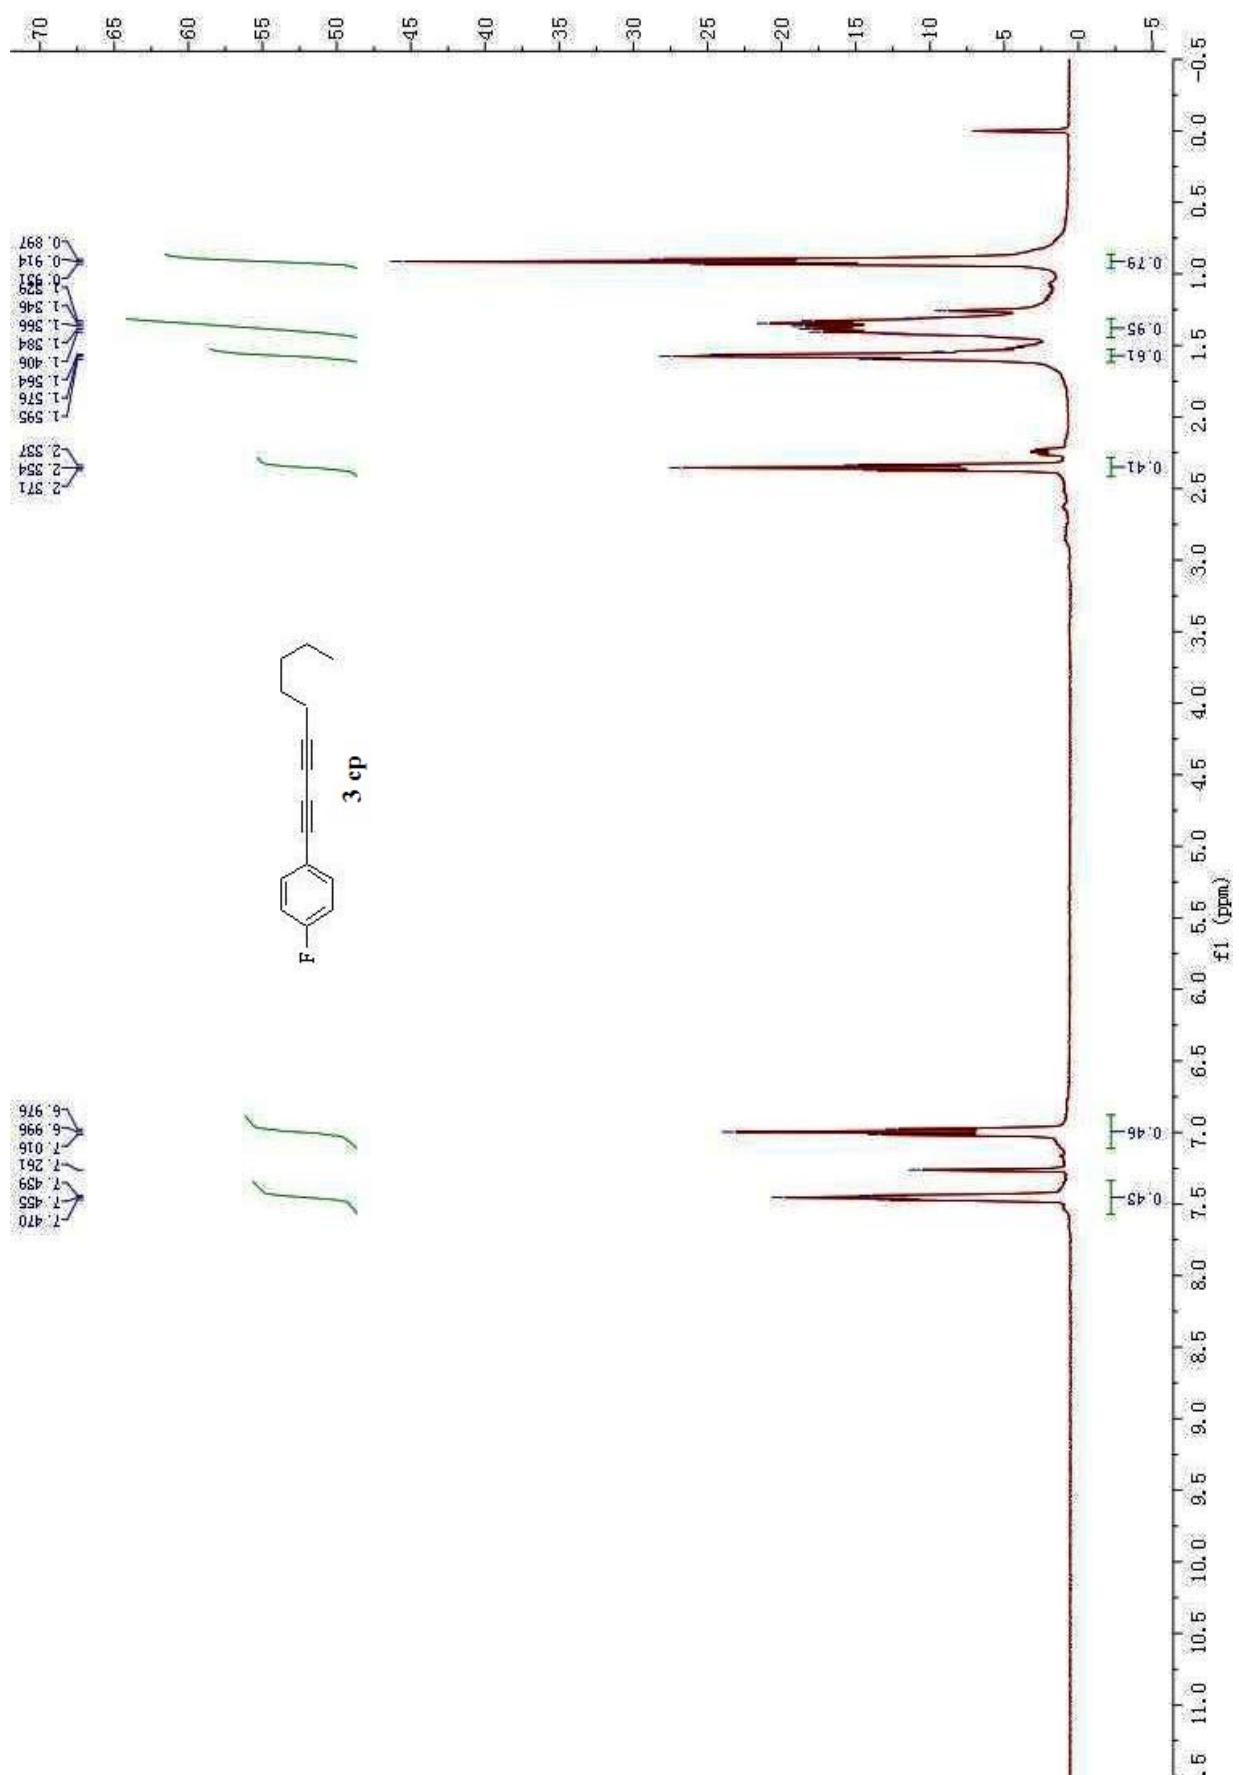



<sup>13</sup>C NMR Spectrum of 1-fluoro-4-(nona-1,3-diynyl)benzene (**3cp**)

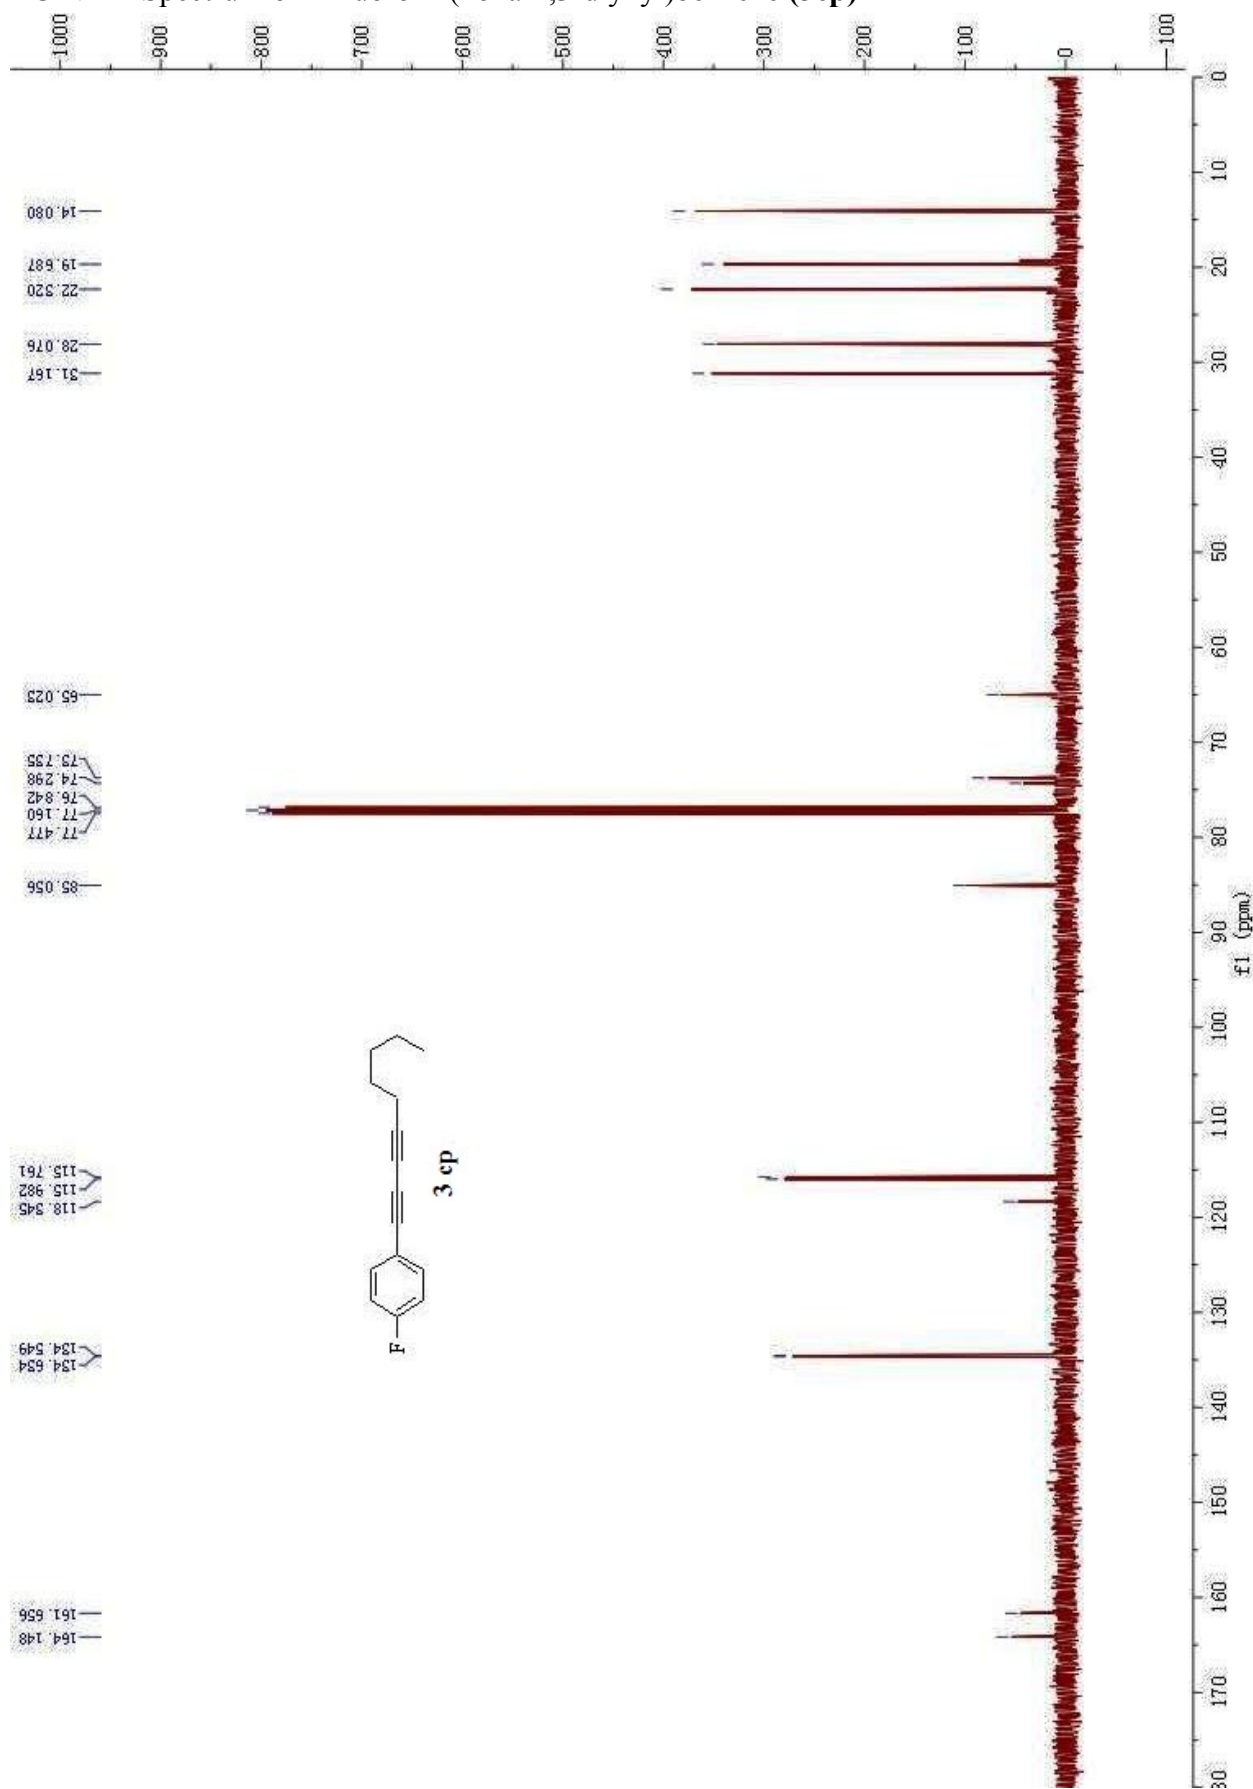

<sup>1</sup>H NMR Spectrum of 1-(4-(4-bromophenyl)buta-1,3-dienyl)-4-methylbenzene (**3dg**)

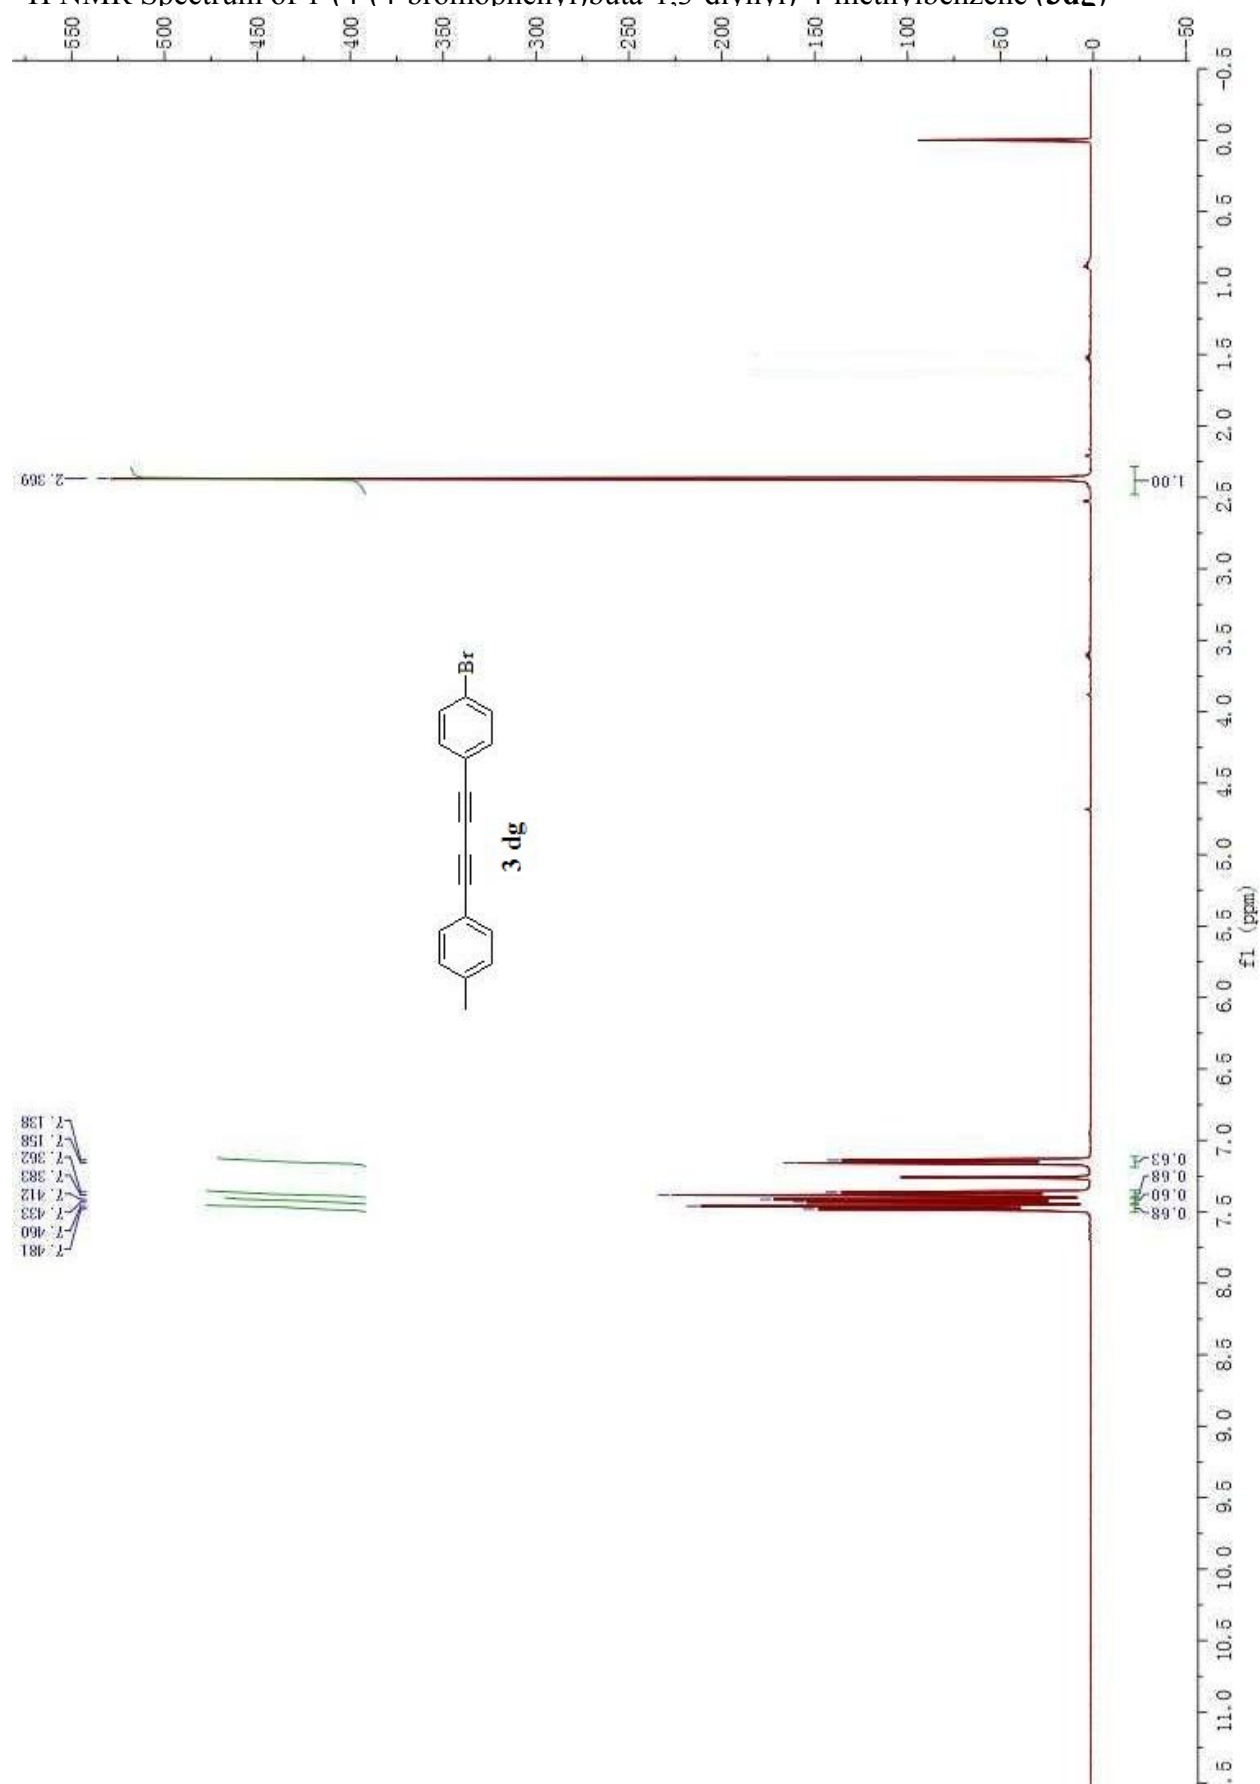

<sup>13</sup>C NMR Spectrum of 1-(4-(4-bromophenyl)buta-1,3-diynyl)-4-methylbenzene (**3dg**)

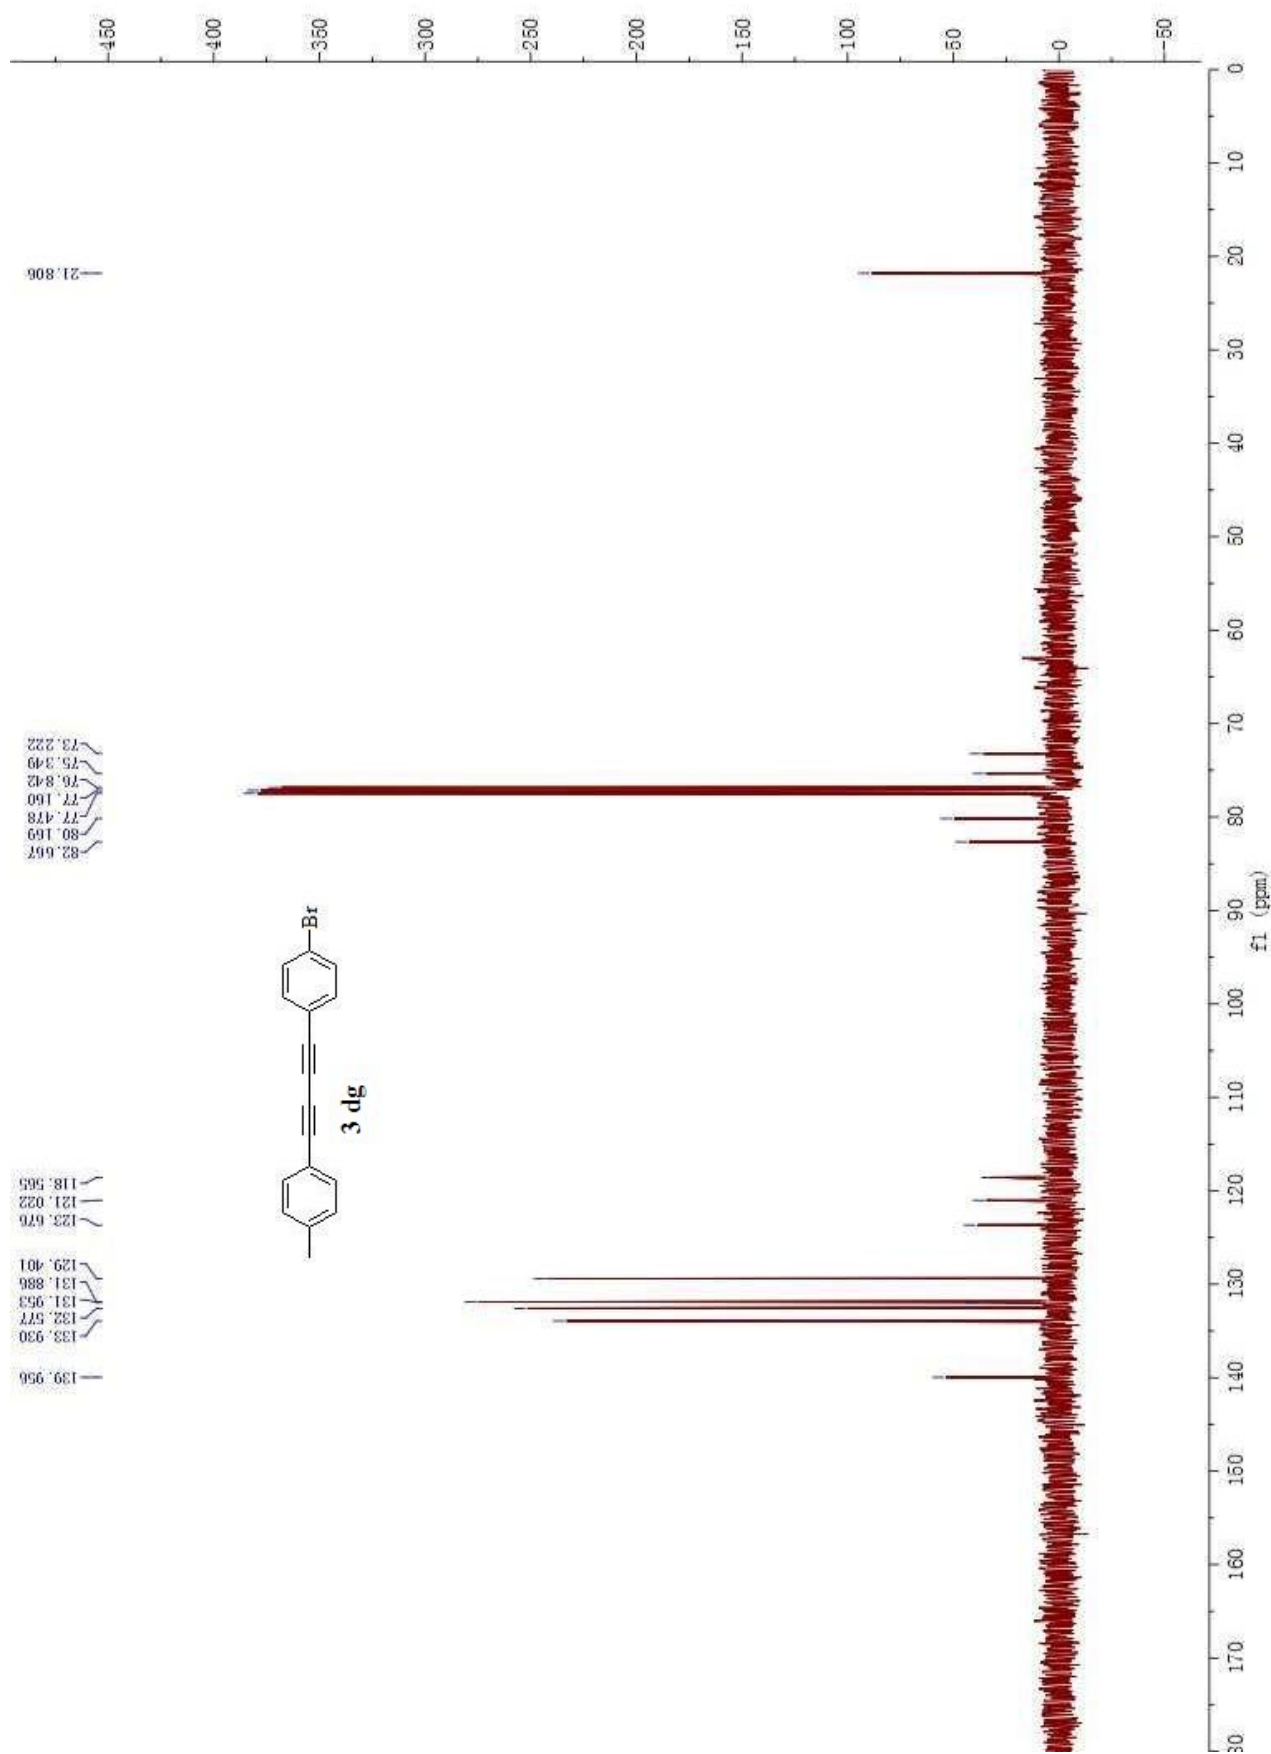

<sup>1</sup>H NMR Spectrum of 1-(4-(4-fluorophenyl)buta-1,3-dienyl)-4-methylbenzene (**3di**)

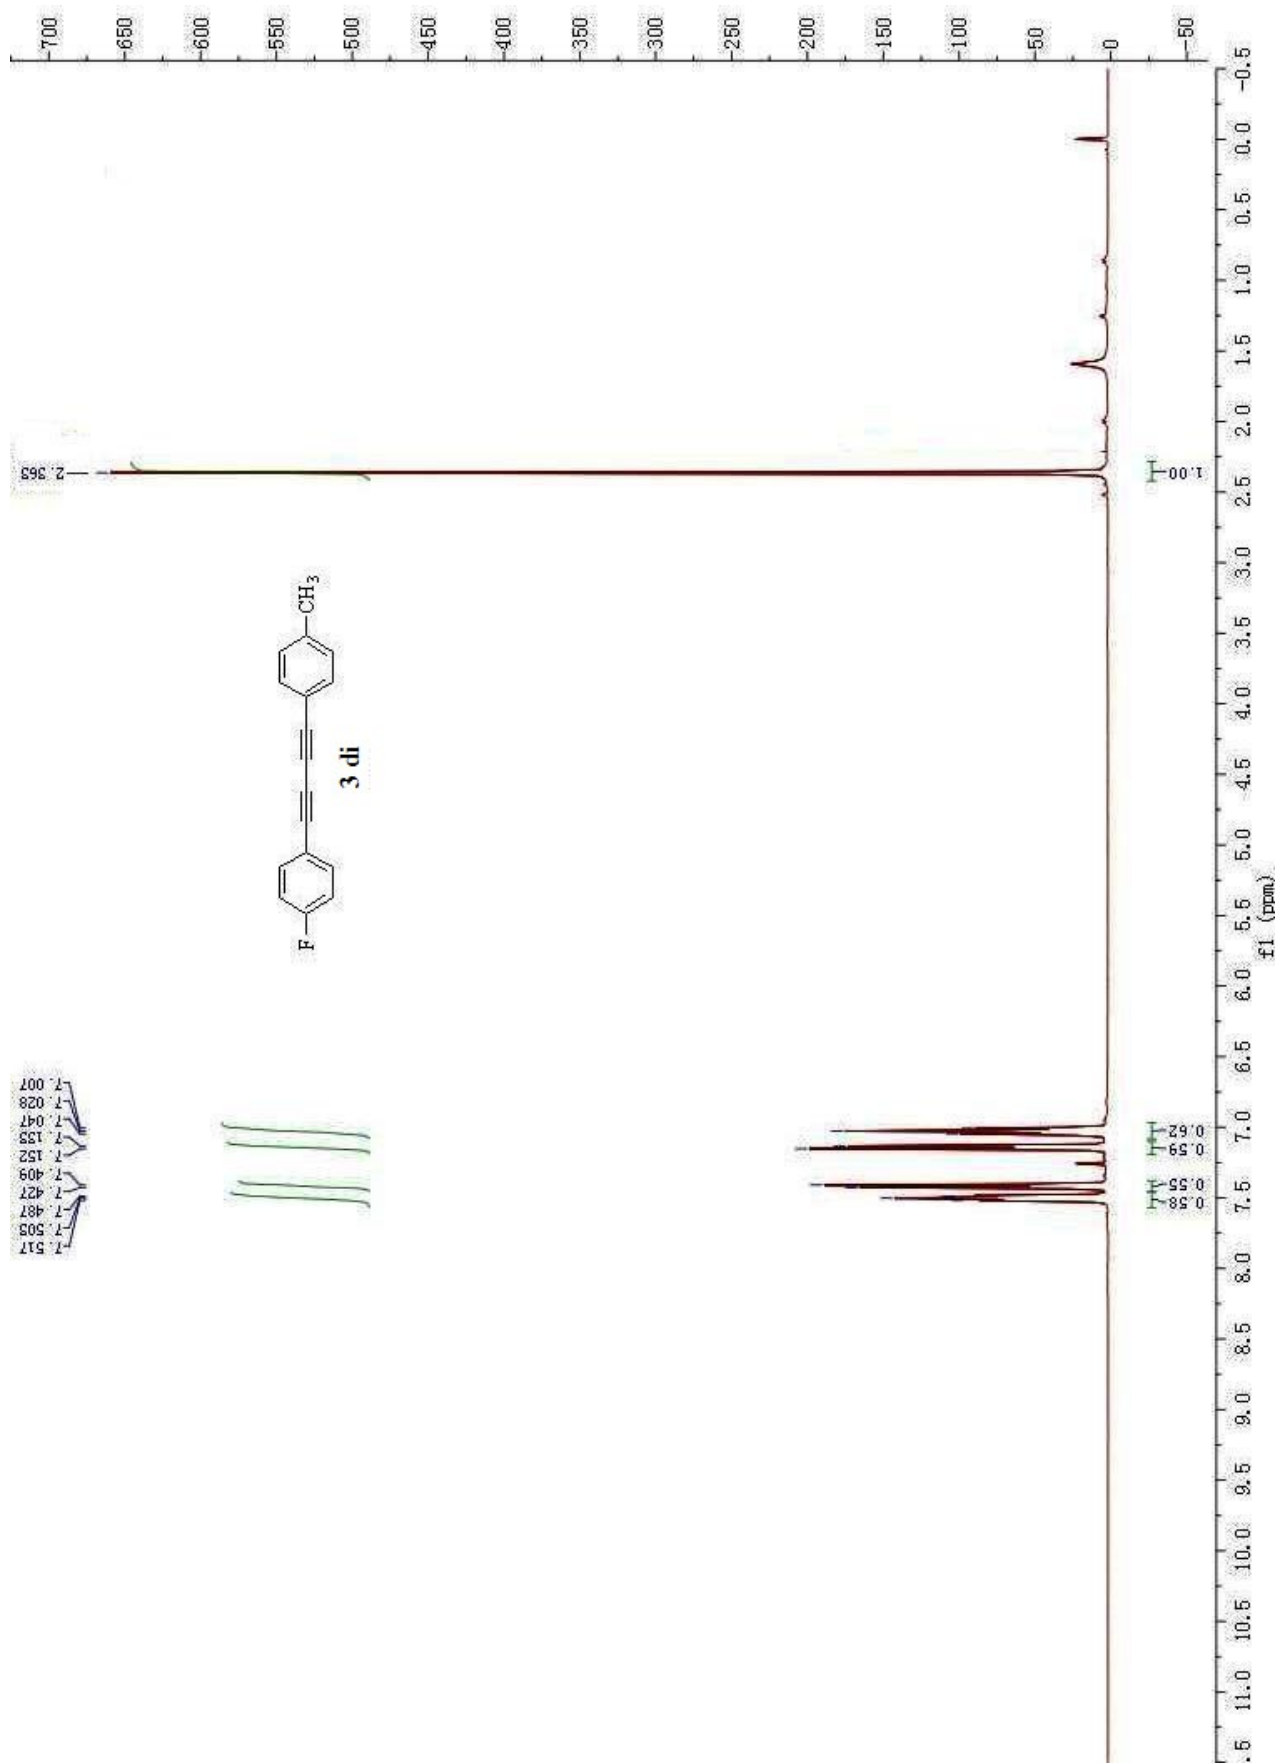

<sup>13</sup>C NMR Spectrum of 1-(4-(4-fluorophenyl)buta-1,3-diynyl)-4-methylbenzene (**3di**)

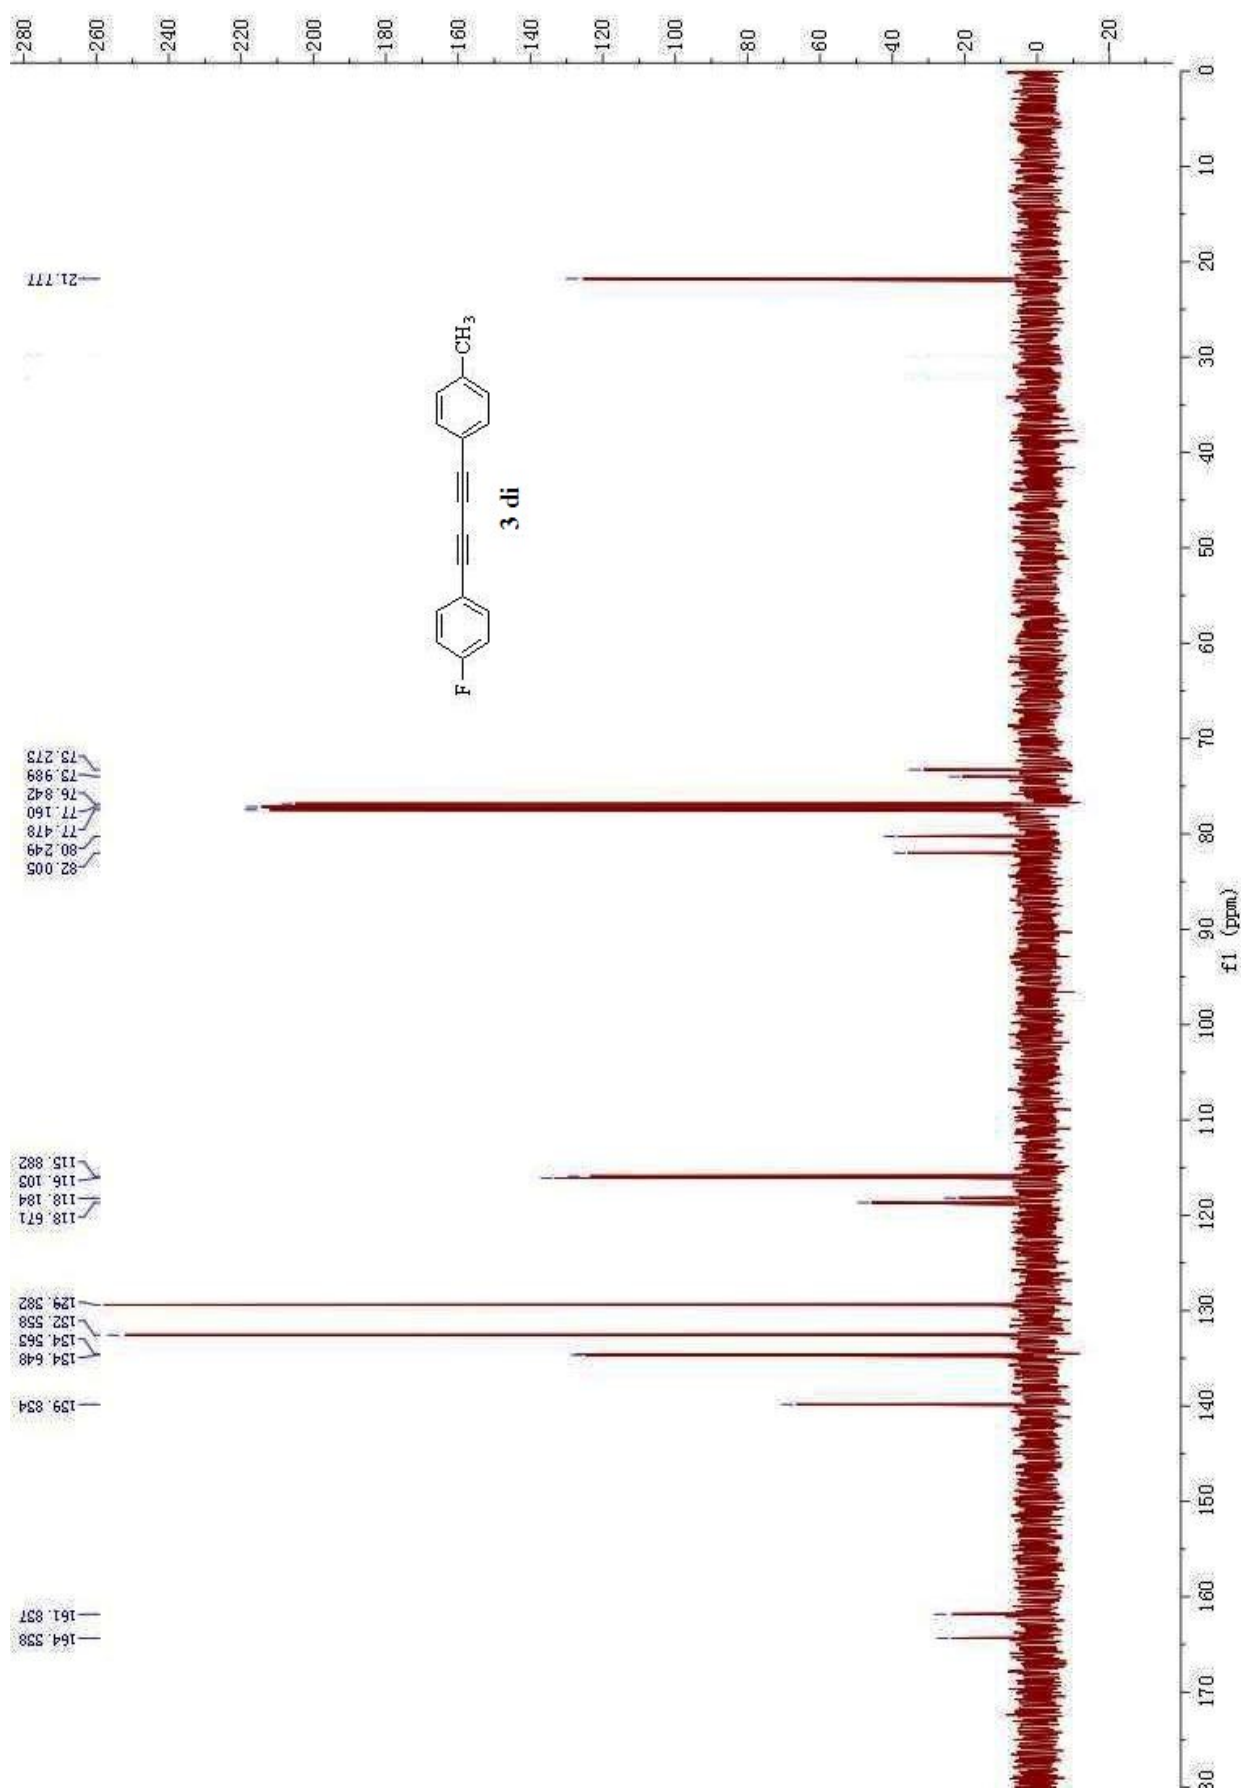

<sup>1</sup>H NMR Spectrum of 1-(4-(3-fluorophenyl)buta-1,3-diynyl)-4-methylbenzene (**3dj**)

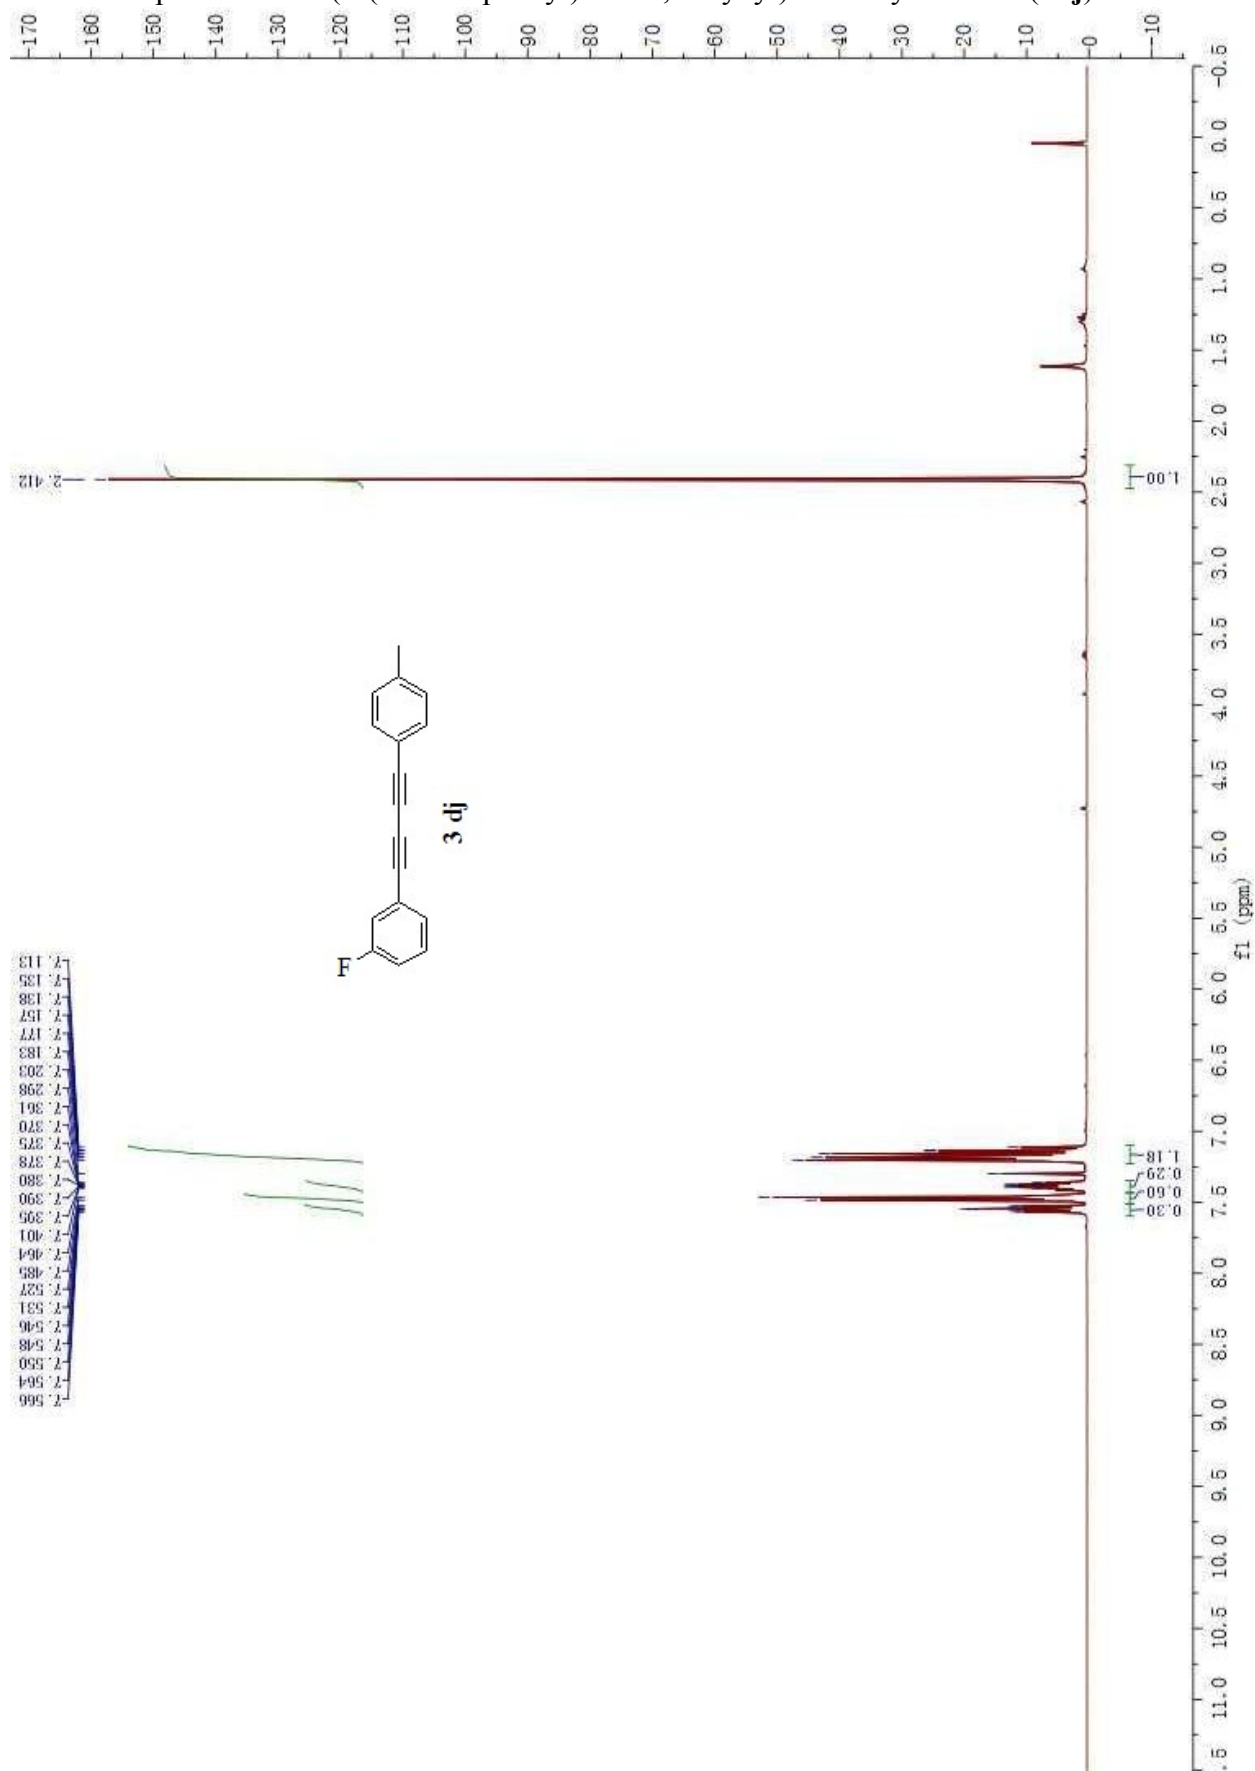

<sup>13</sup>C NMR Spectrum of 1-(4-(3-fluorophenyl)buta-1,3-diynyl)-4-methylbenzene (**3dj**)

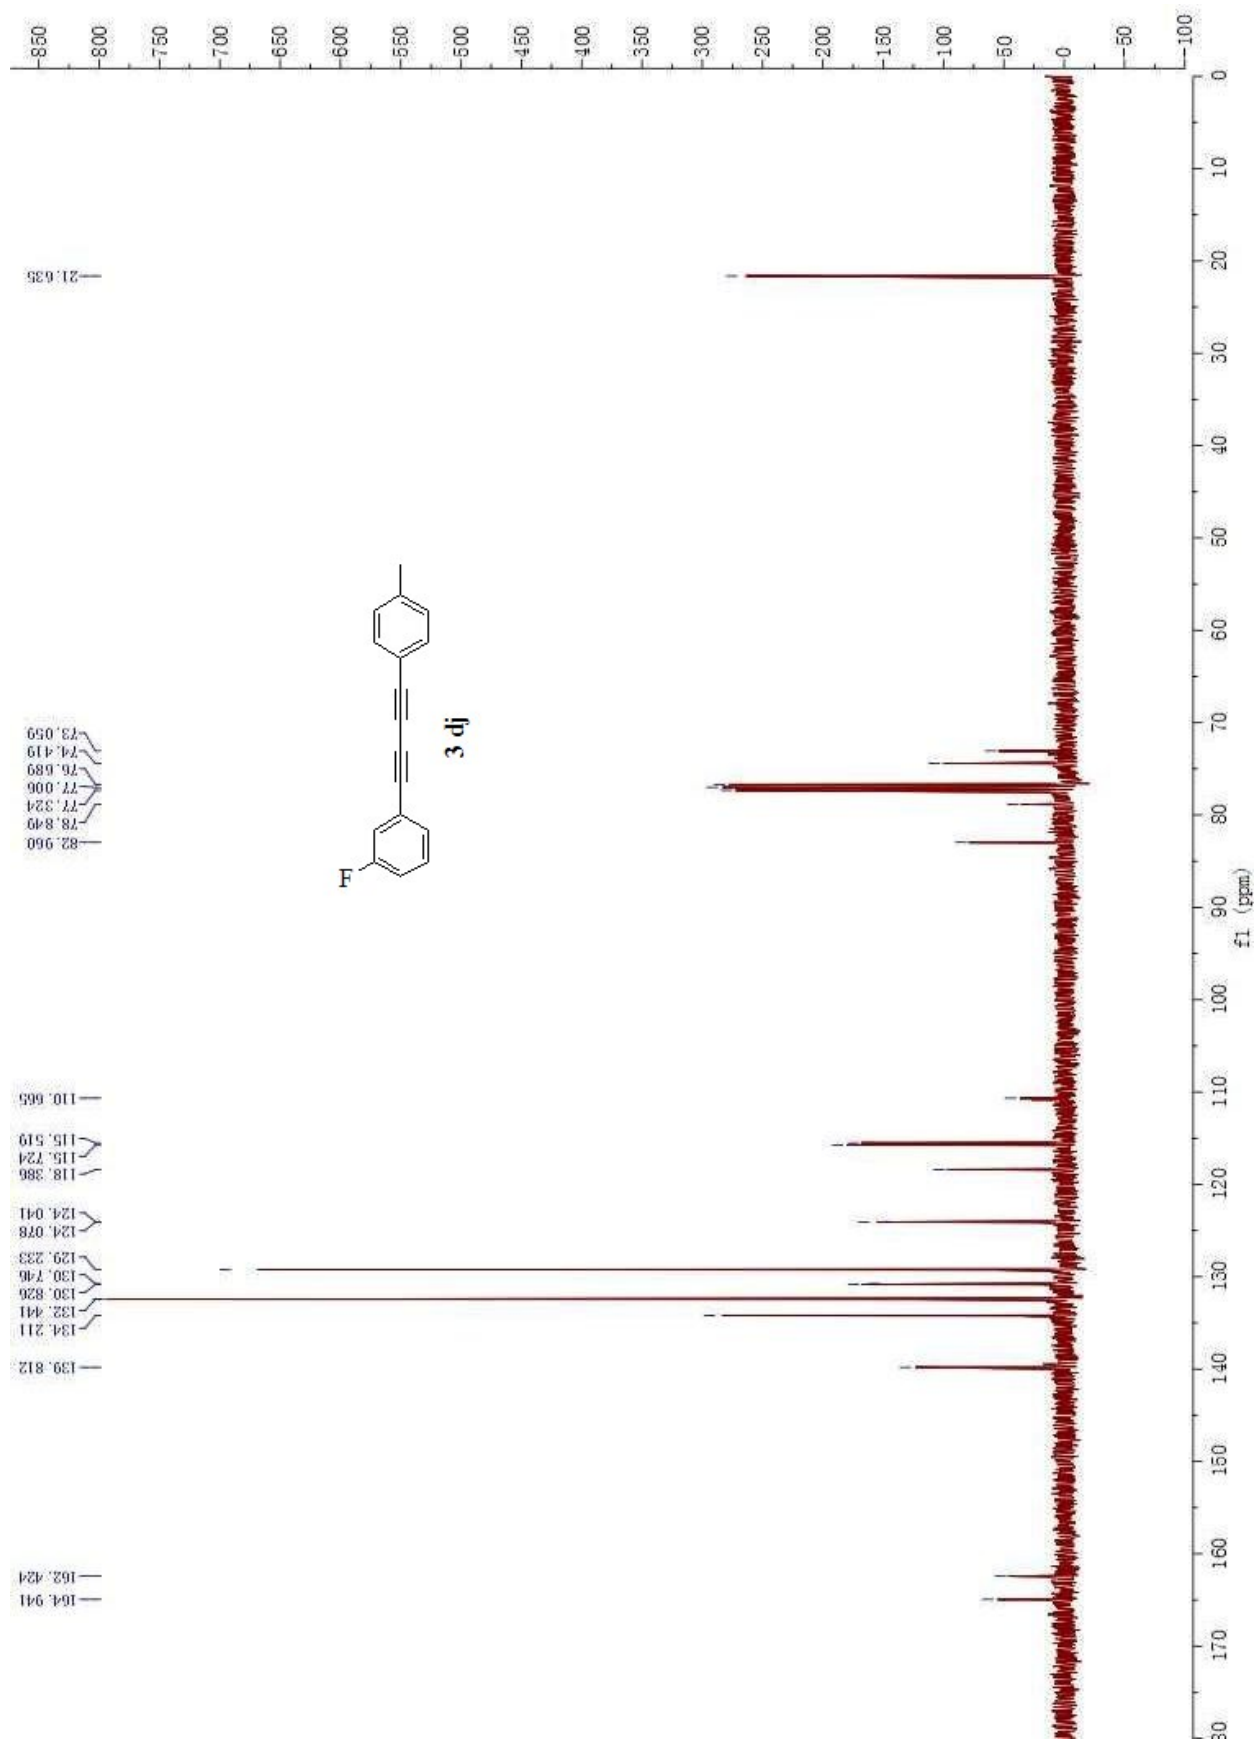

<sup>1</sup>H NMR Spectrum of 1-(4-(2-fluorophenyl)buta-1,3-diynyl)-4-methylbenzene (**3dk**)

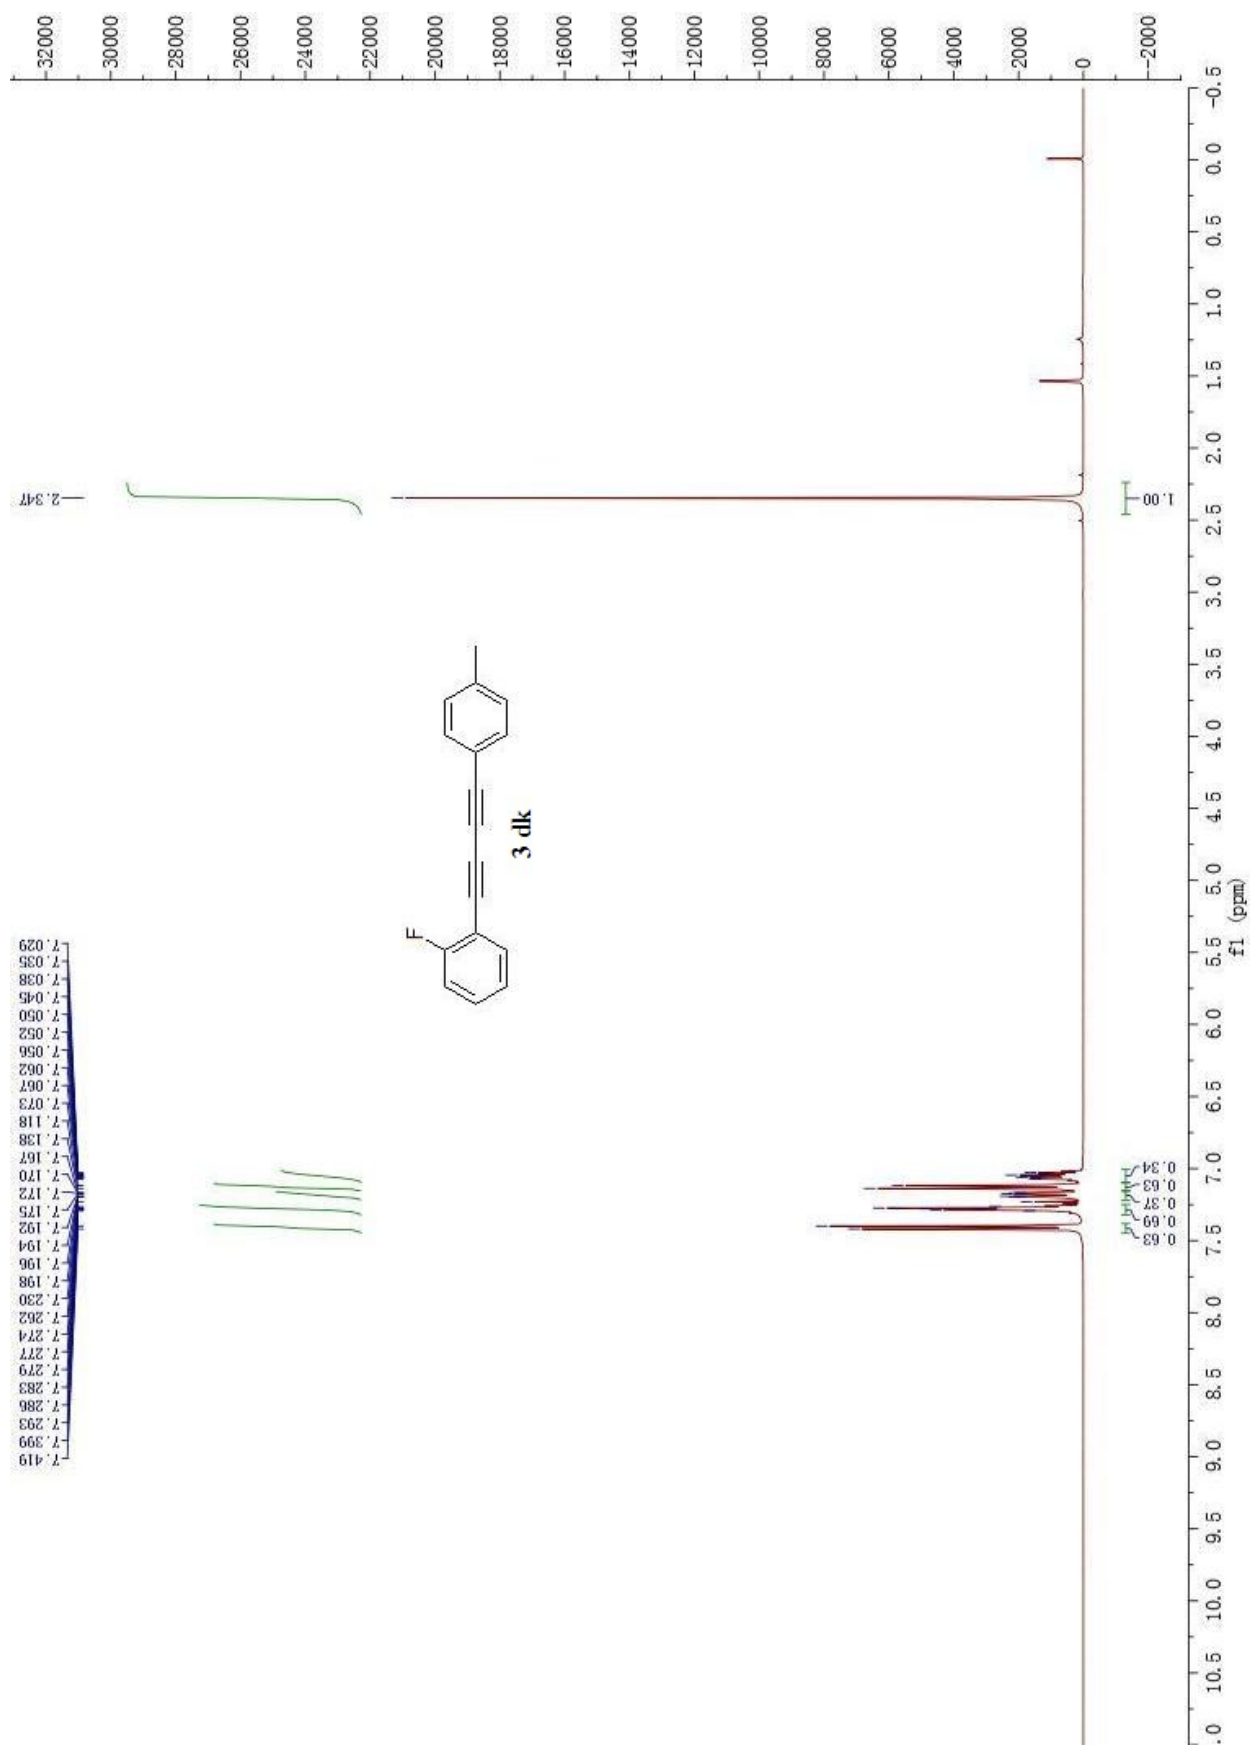



<sup>13</sup>C NMR Spectrum of 1-(4-(2-fluorophenyl)buta-1,3-diynyl)-4-methylbenzene (**3dk**)

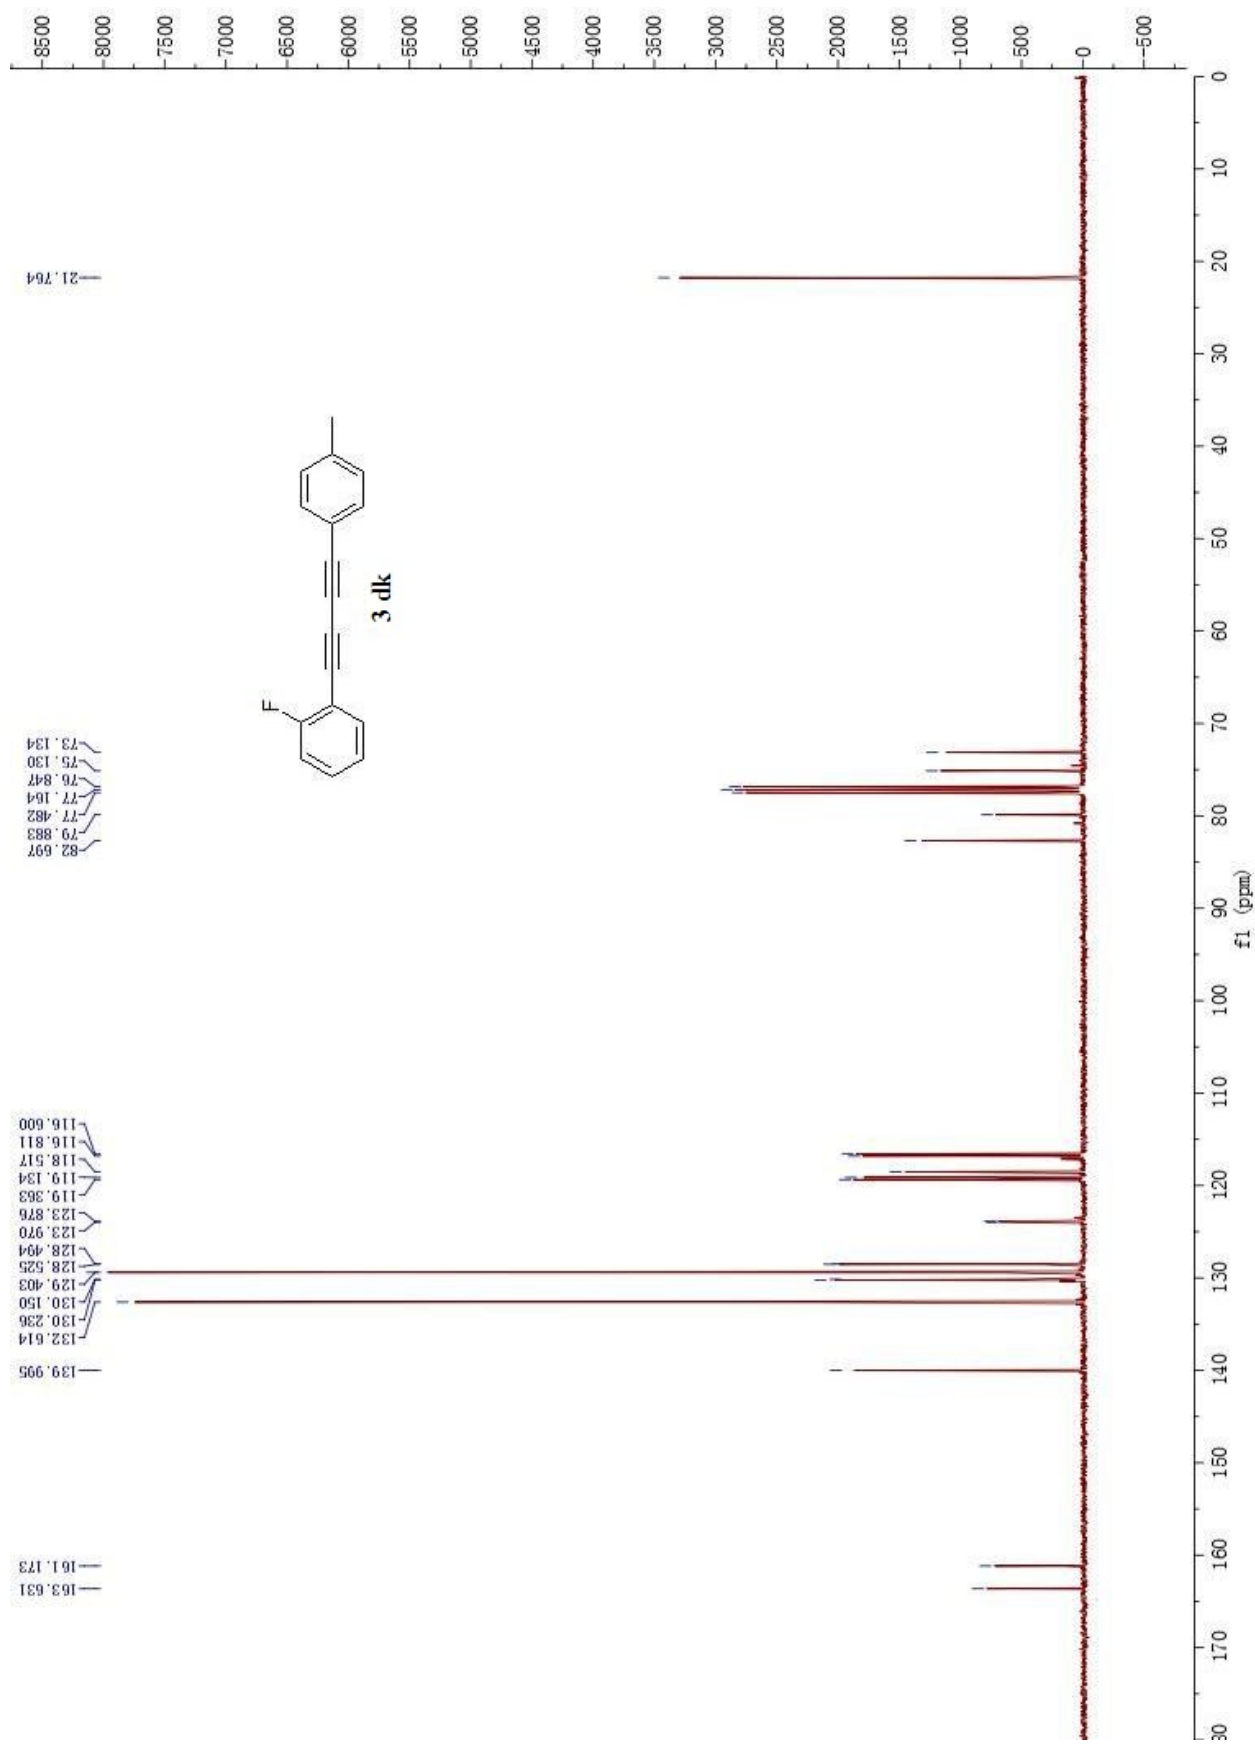

<sup>1</sup>H NMR Spectrum of 1-(4-(4-trifluoromethylphenyl)buta-1,3-diynyl)-4-methylbenzene (**3dl**)

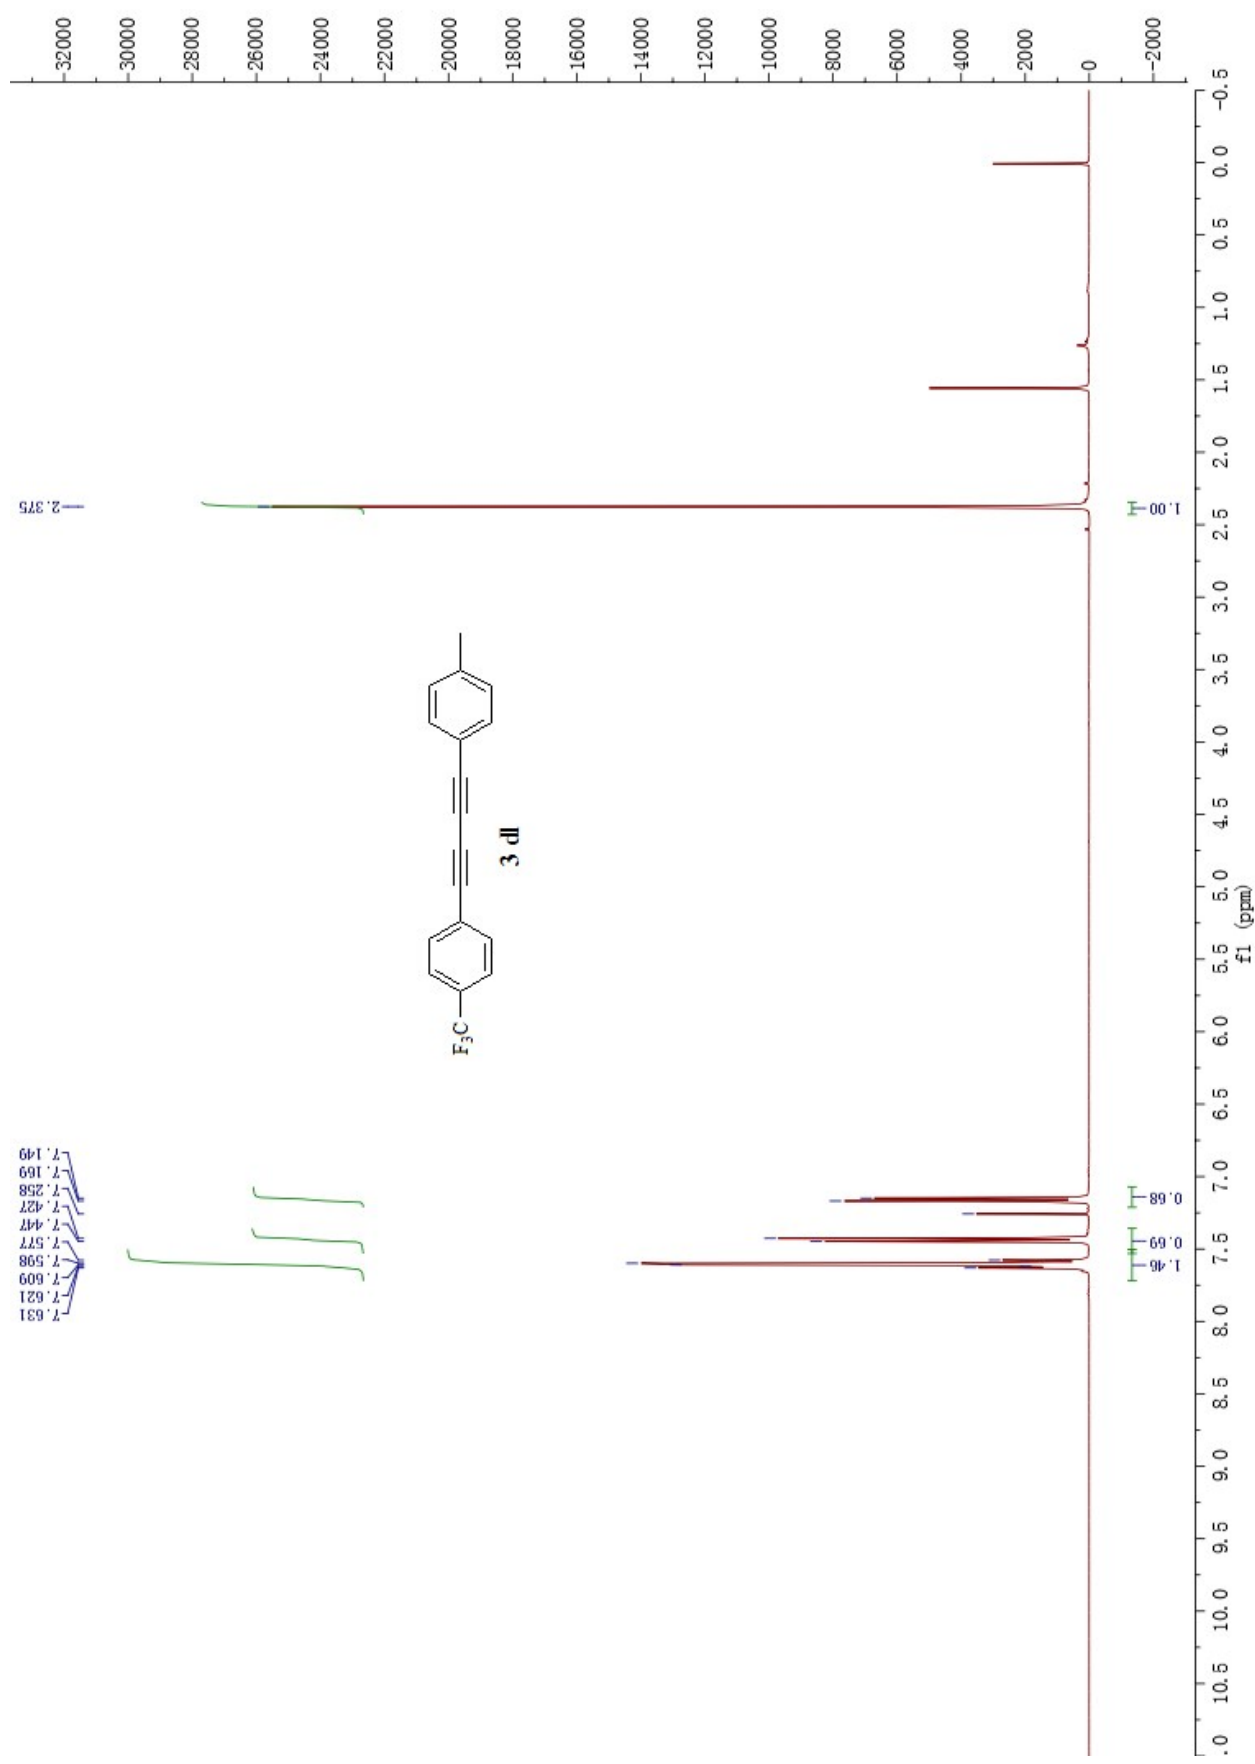

<sup>13</sup>C NMR Spectrum of 1-(4-(4-trifluoromethylphenyl)buta-1,3-diynyl)-4-methylbenzene (**3dl**)

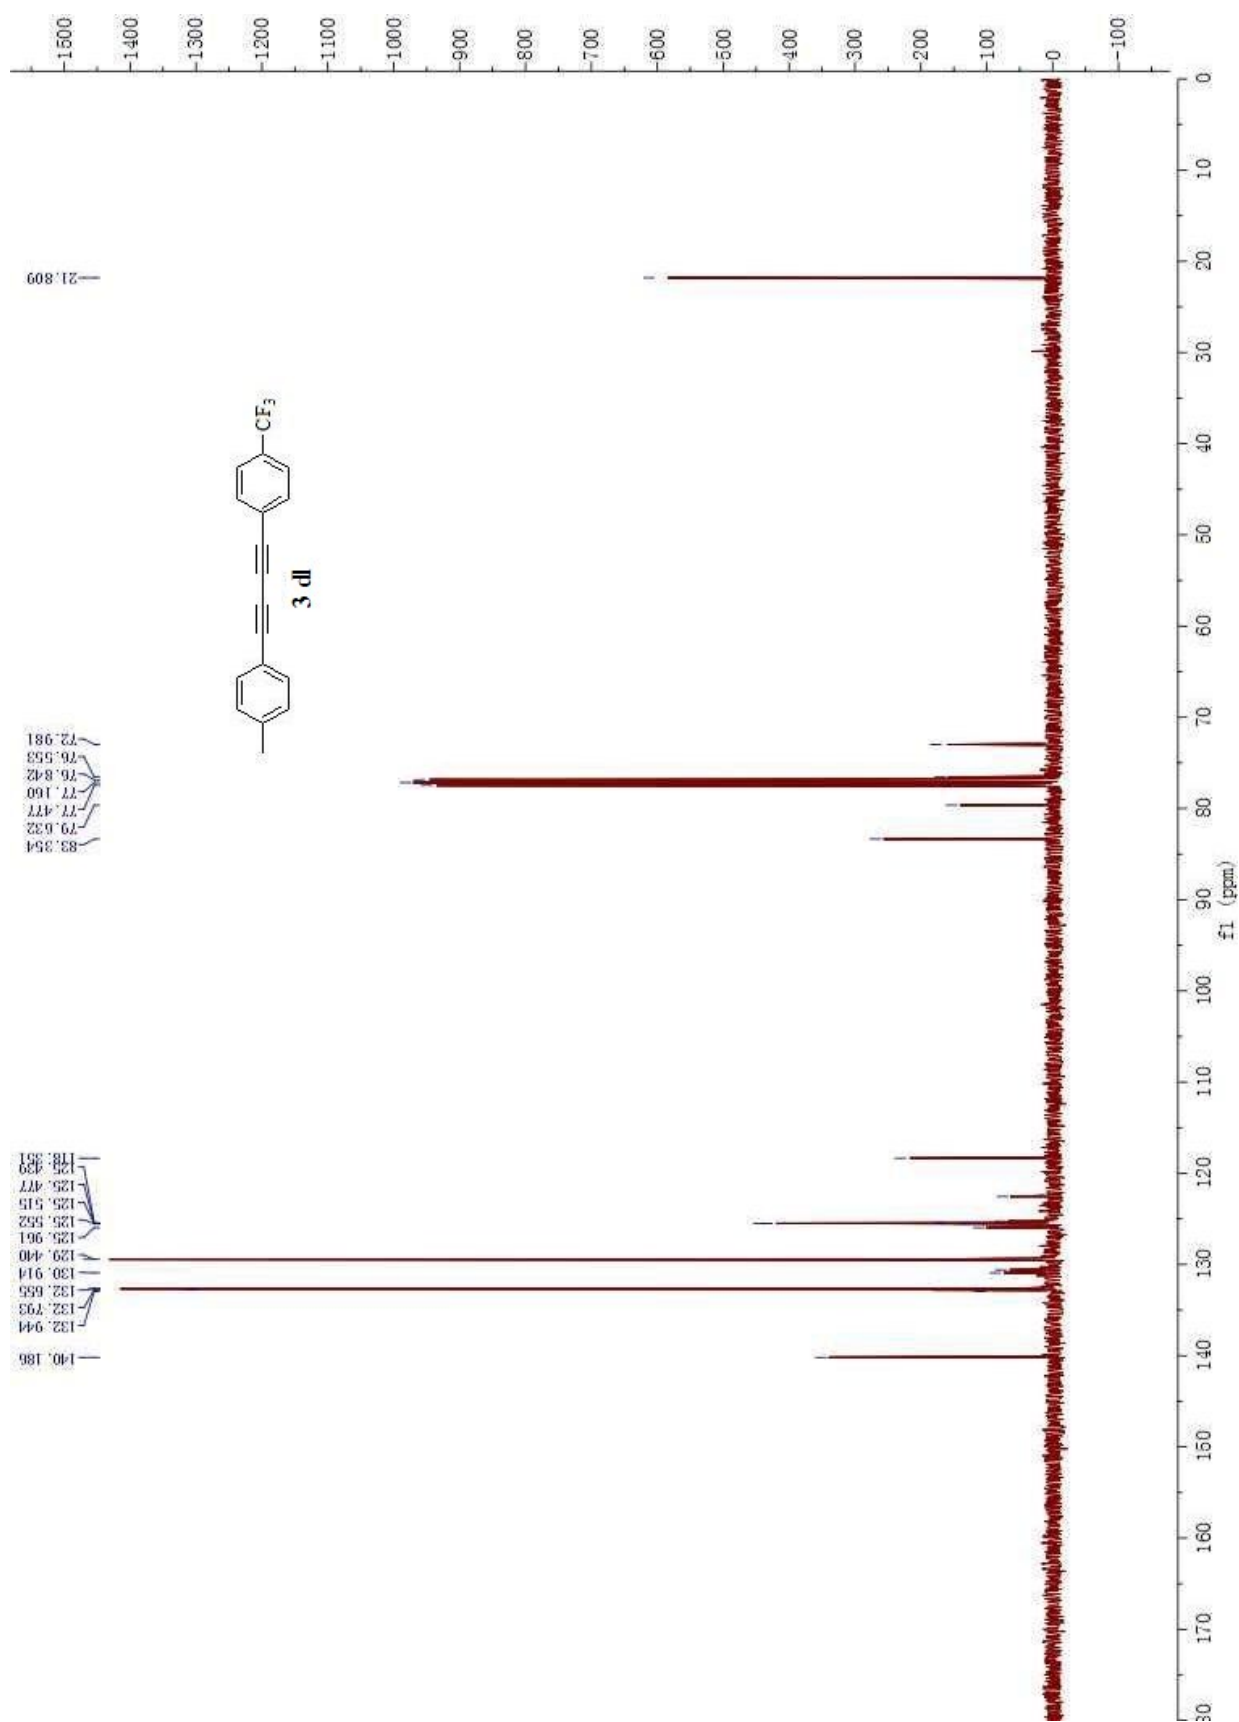

<sup>1</sup>H NMR Spectrum of 2-(4-(4-methylphenyl)buta-1,3-diynyl)pyridine (**3dm**)

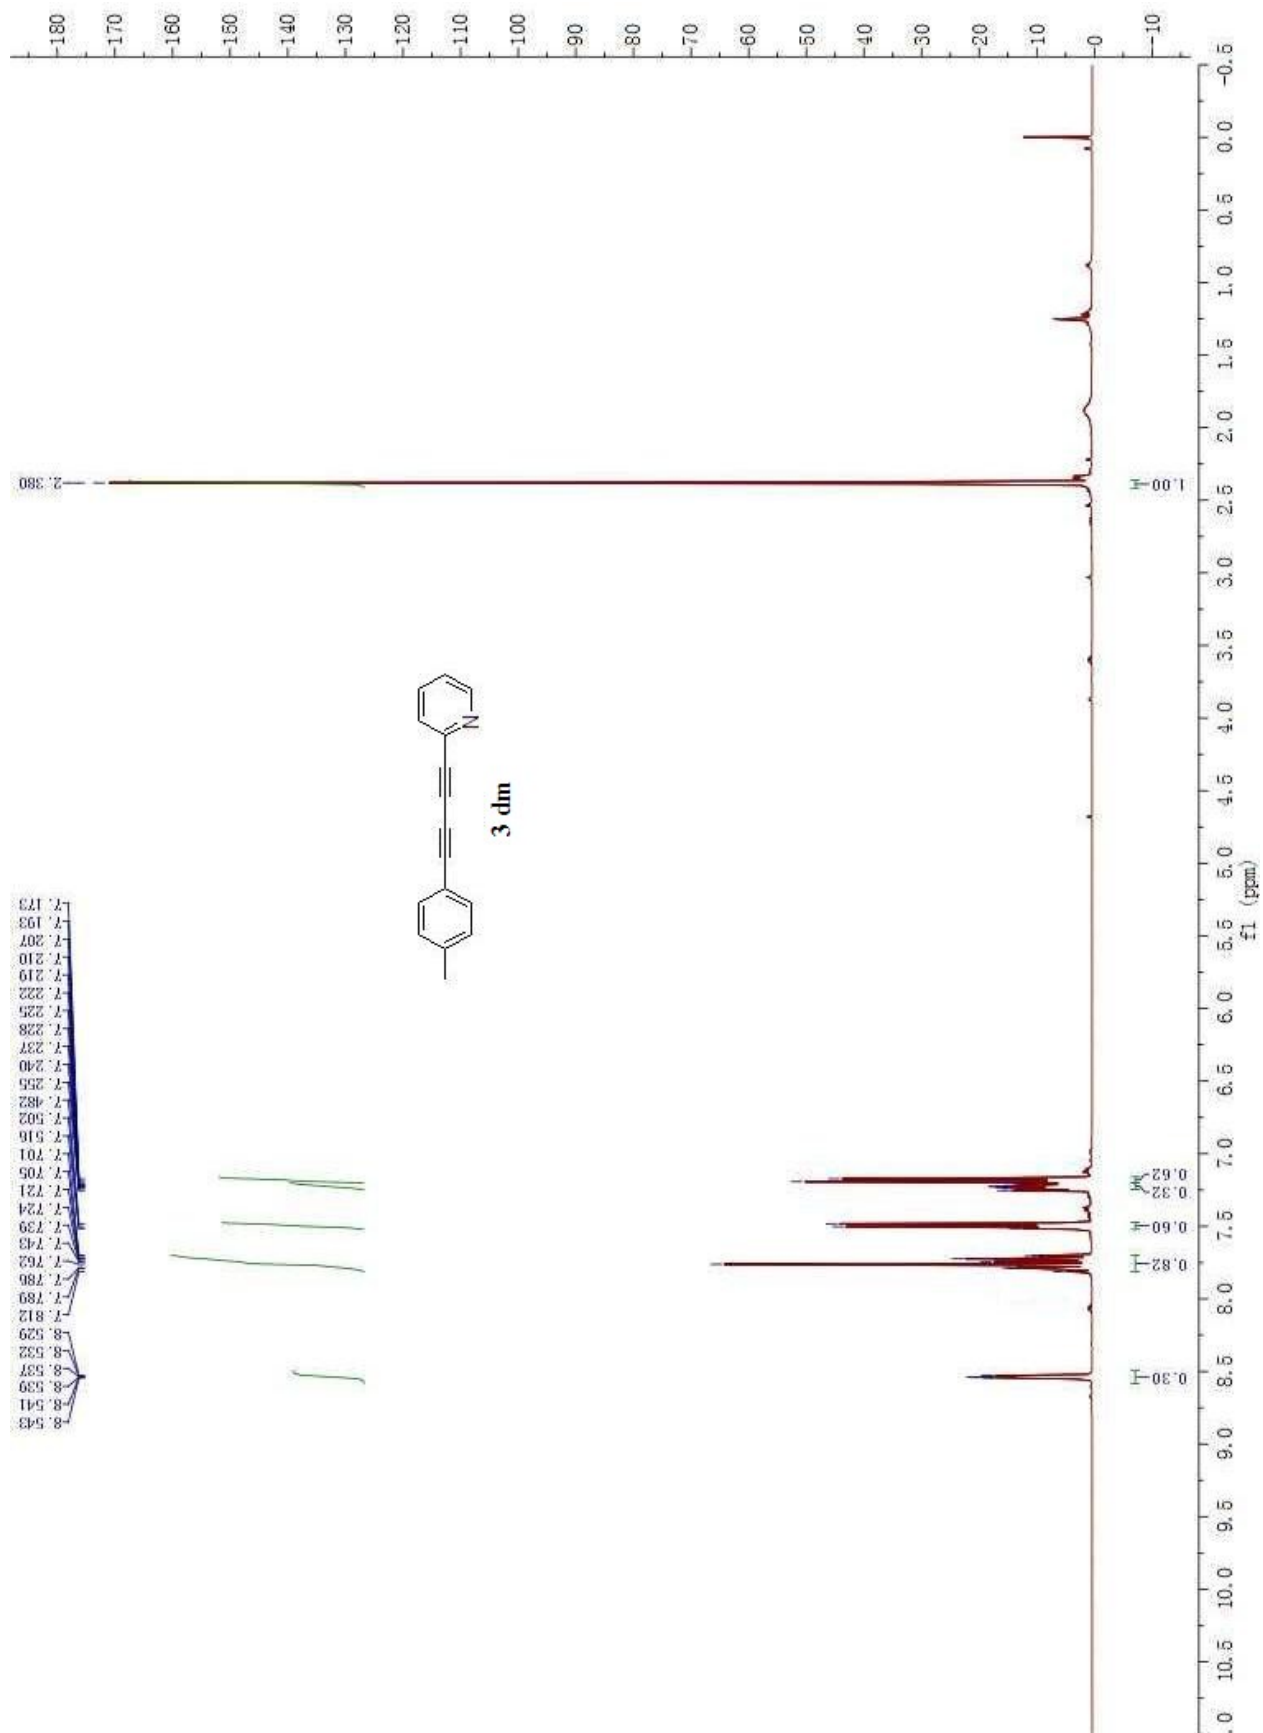

<sup>13</sup>C NMR Spectrum of 2-(4-(4-methylphenyl)buta-1,3-diynyl)pyridine(**3dm**)

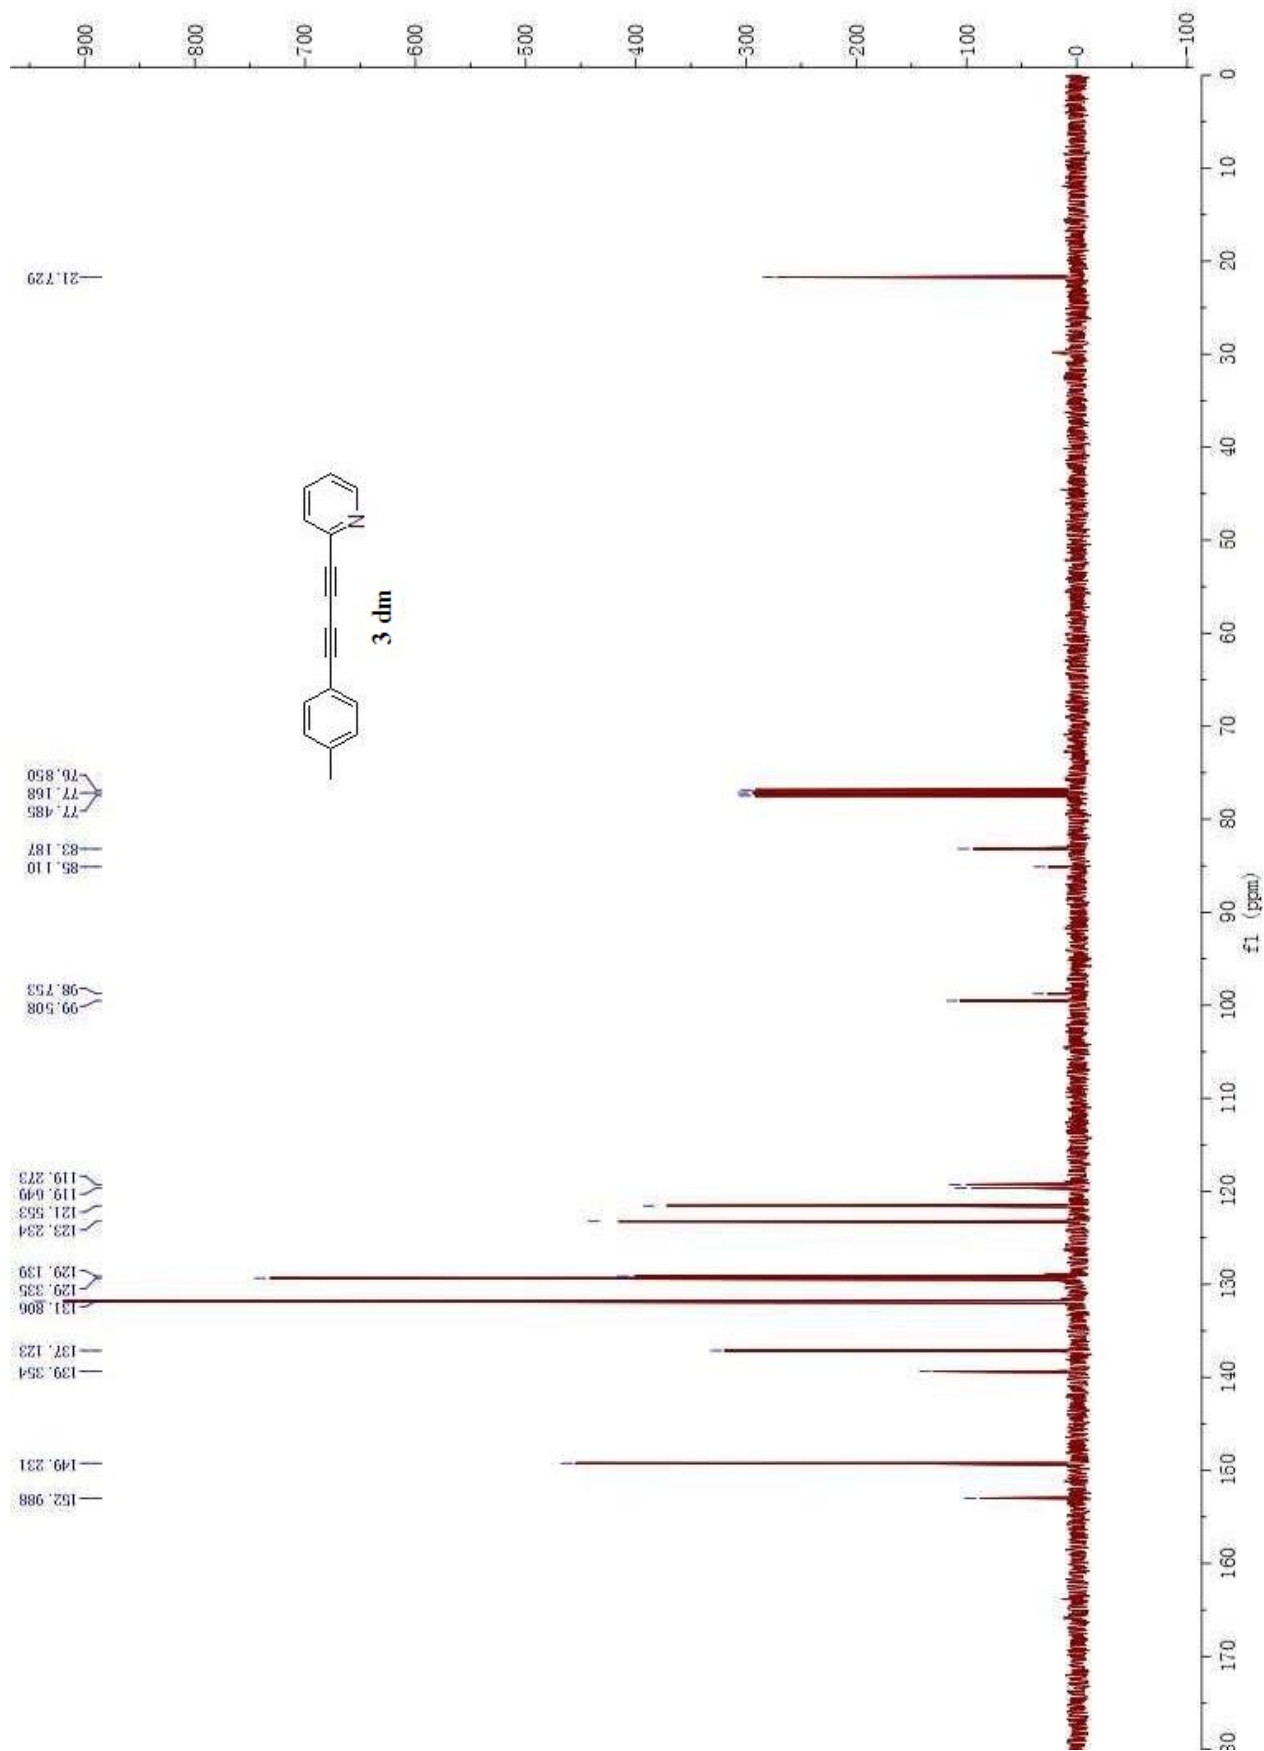

<sup>1</sup>H NMR Spectrum of trimethyl-(4-phenyl-buta-1,3-diynyl)-silane(**3fo**)

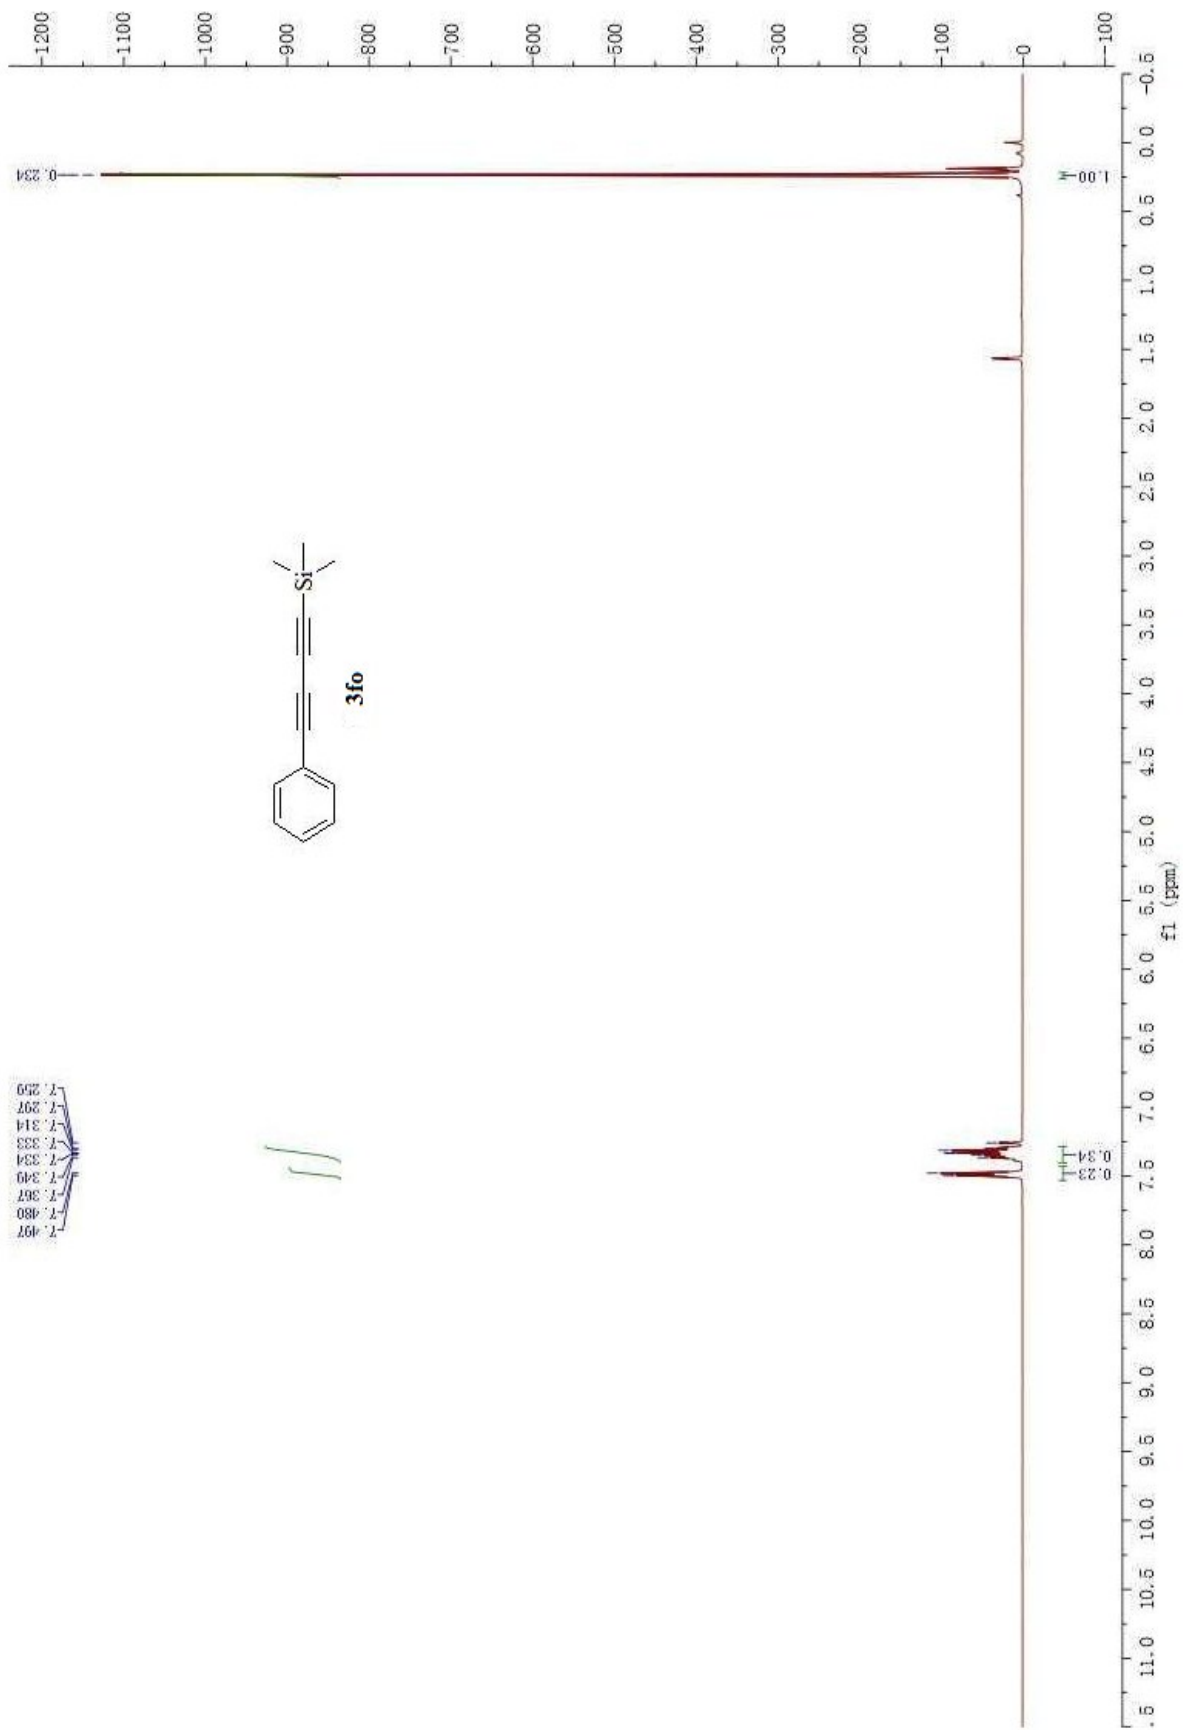

<sup>13</sup>C NMR Spectrum of trimethyl-(4-phenyl-buta-1,3-diynyl)-silane(**3fo**)

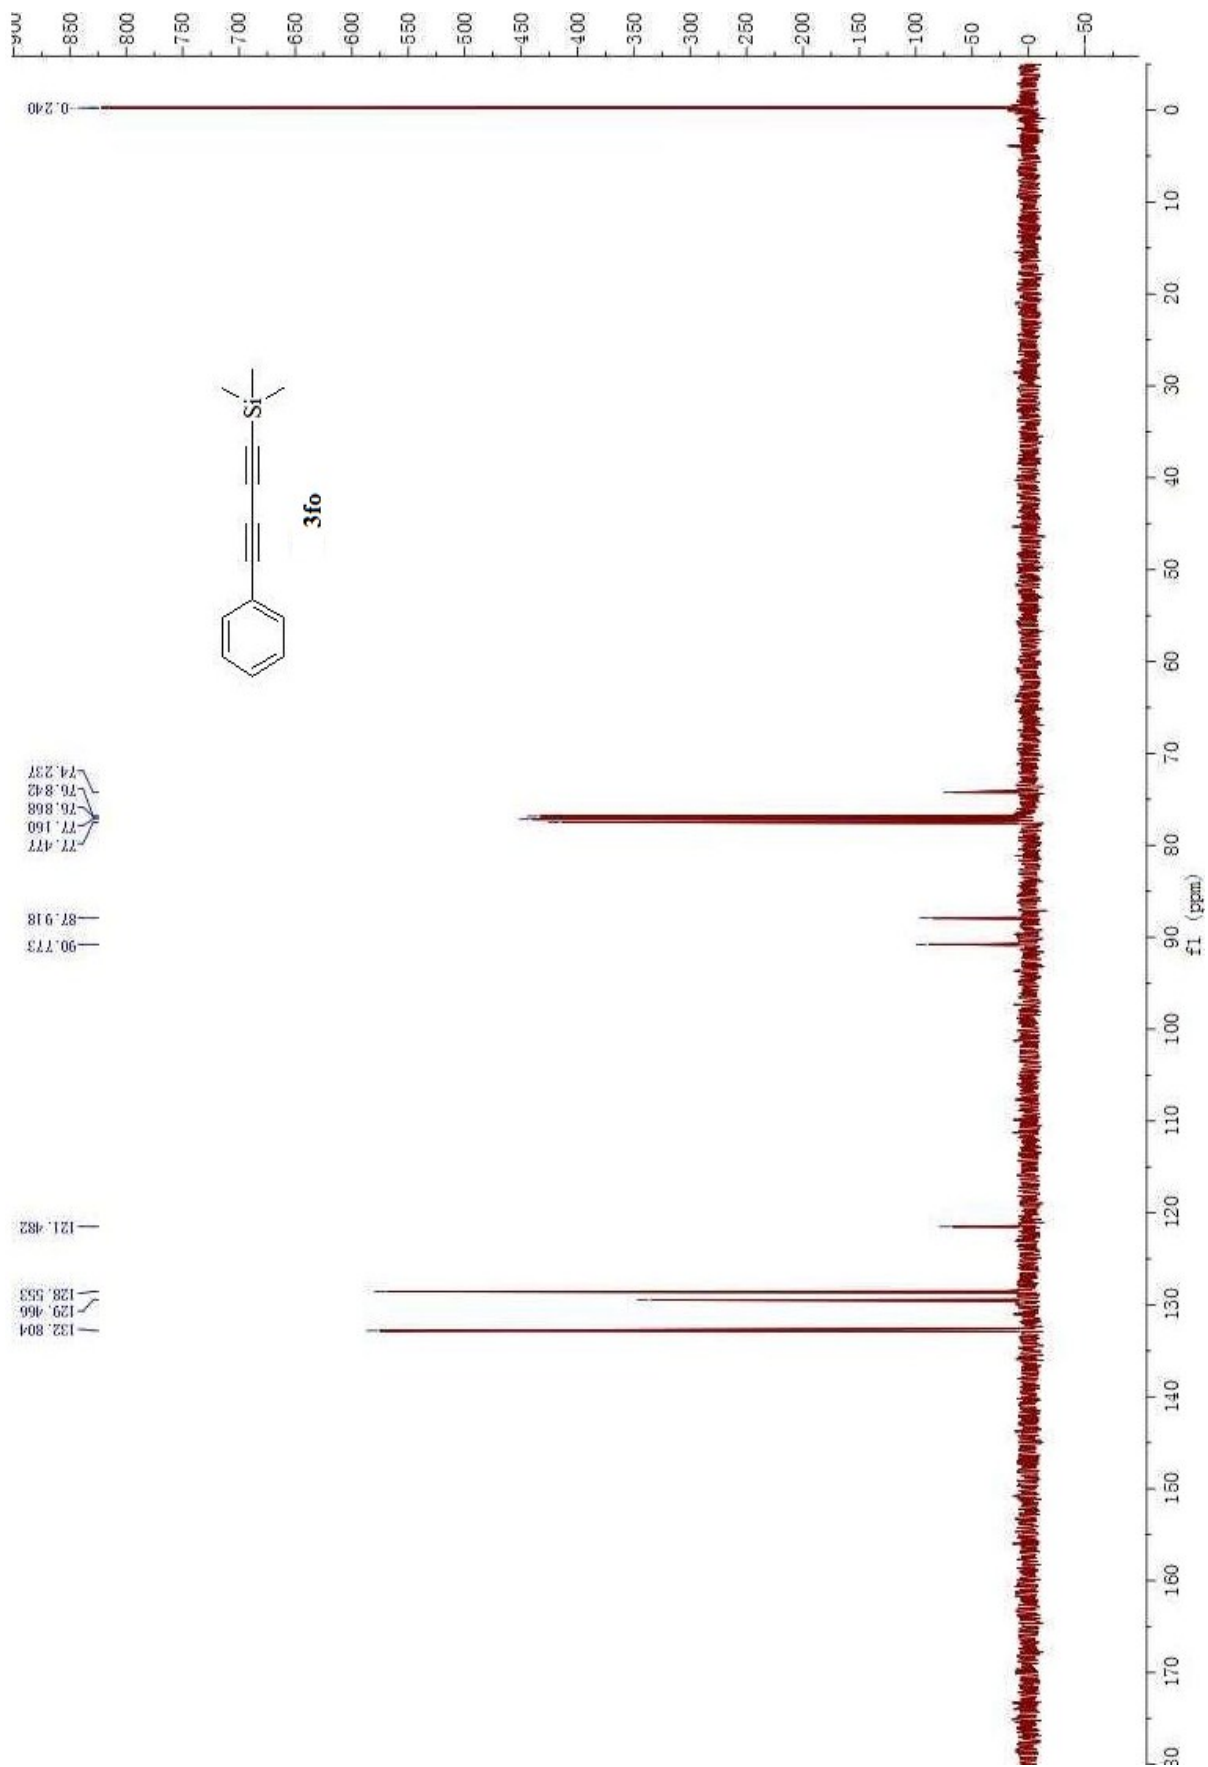

<sup>1</sup>H NMR Spectrum of [4-(4-tert-Butyl-phenyl)-buta-1,3-dienyl]-trimethyl-silane(**3fd**)

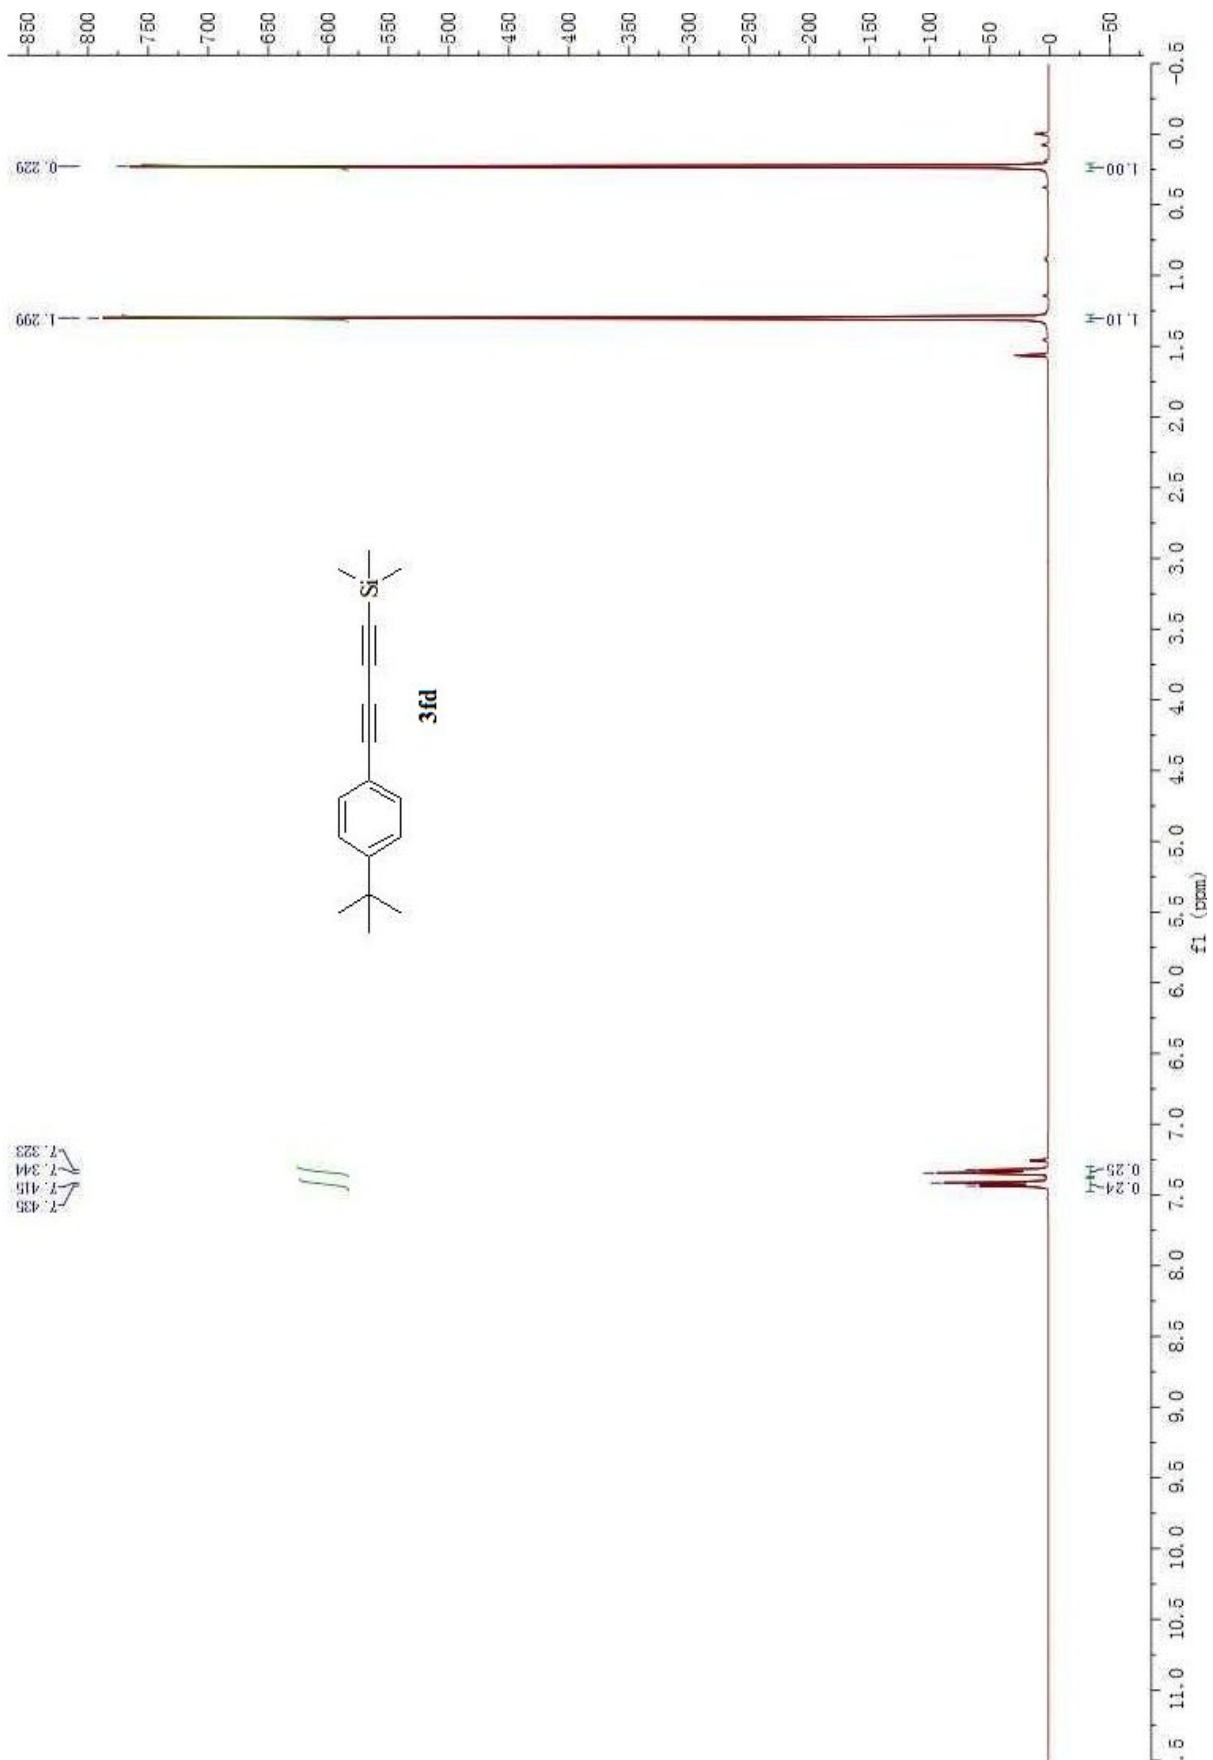

<sup>13</sup>C NMR Spectrum of [4-(4-tert-Butyl-phenyl)-buta-1,3-diynyl]-trimethyl-silane (**3fd**)



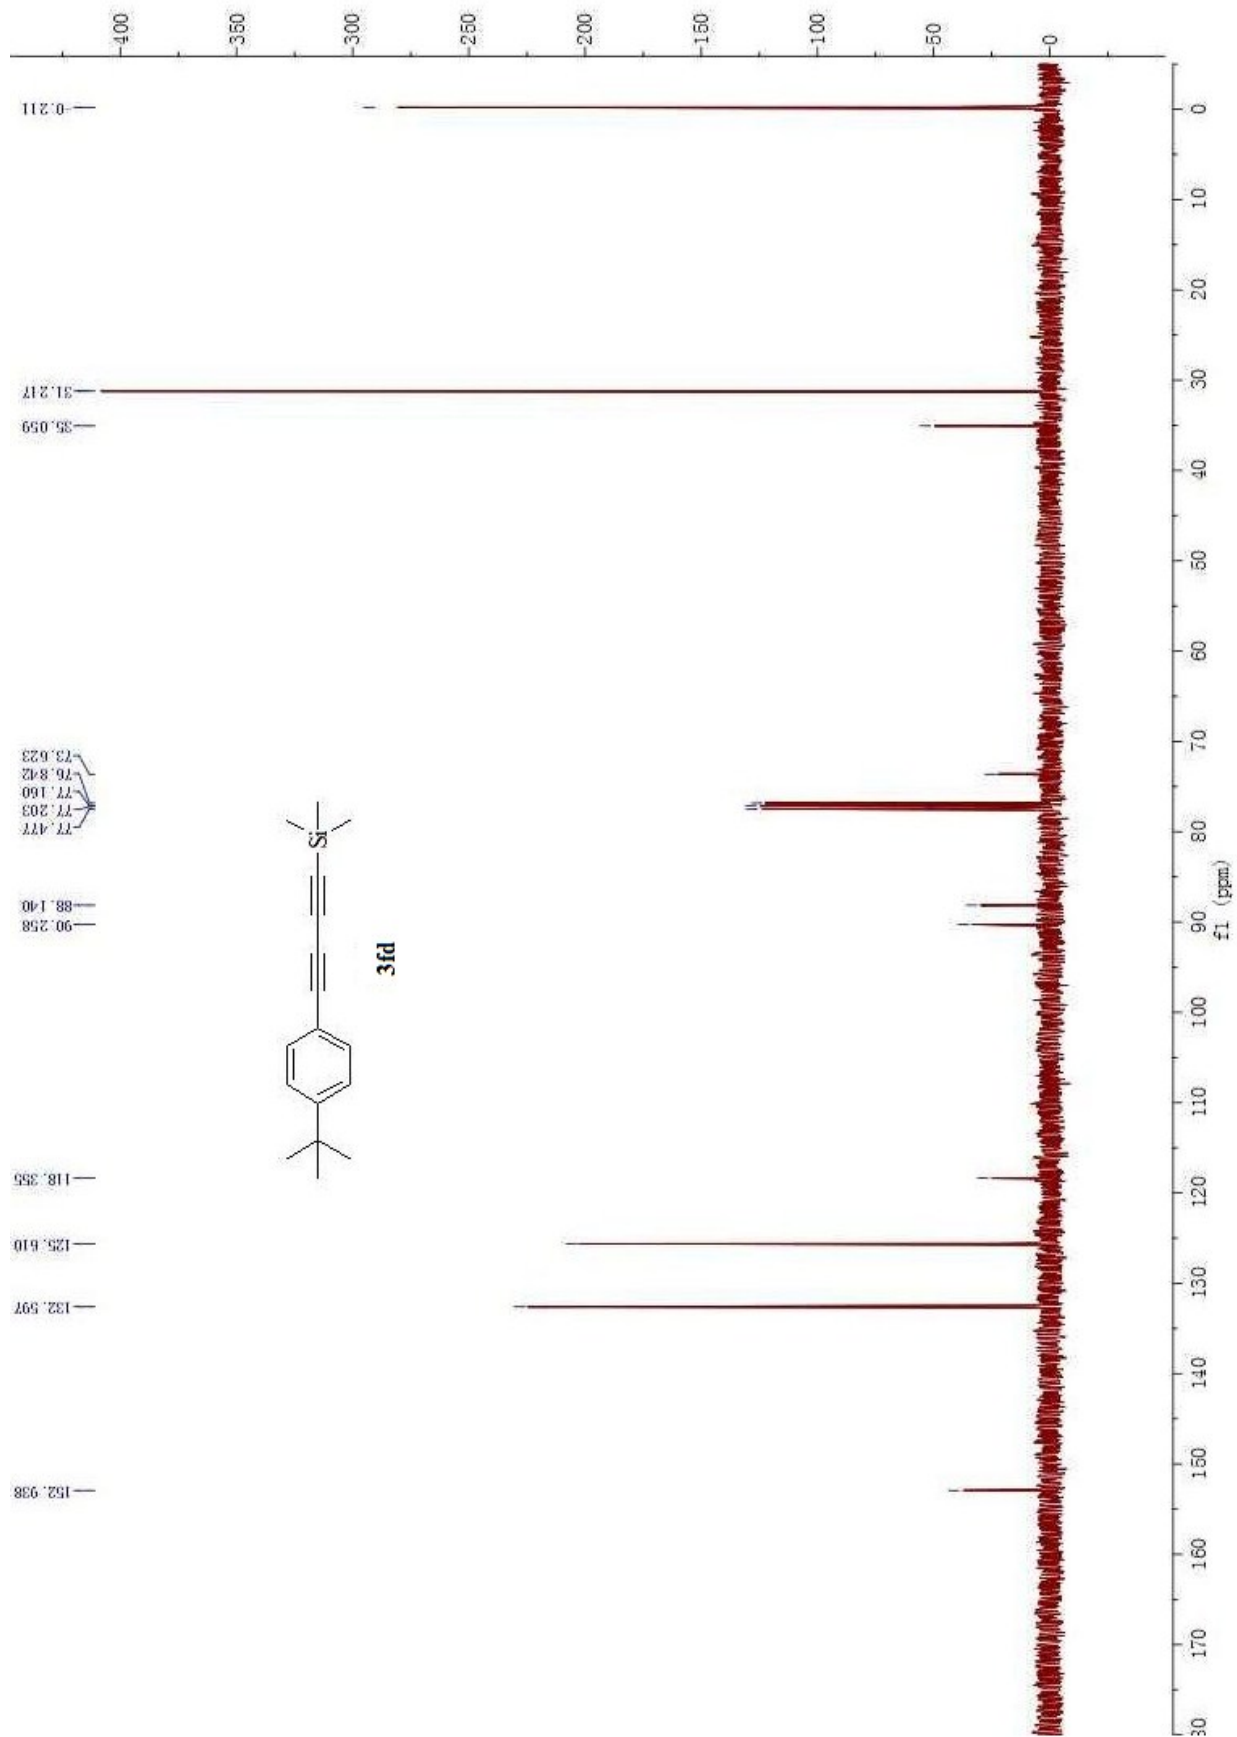

<sup>1</sup>H NMR Spectrum of [4-(4-Methoxy-phenyl)-buta-1,3-diyne]-trimethyl-silane(**3ff**)

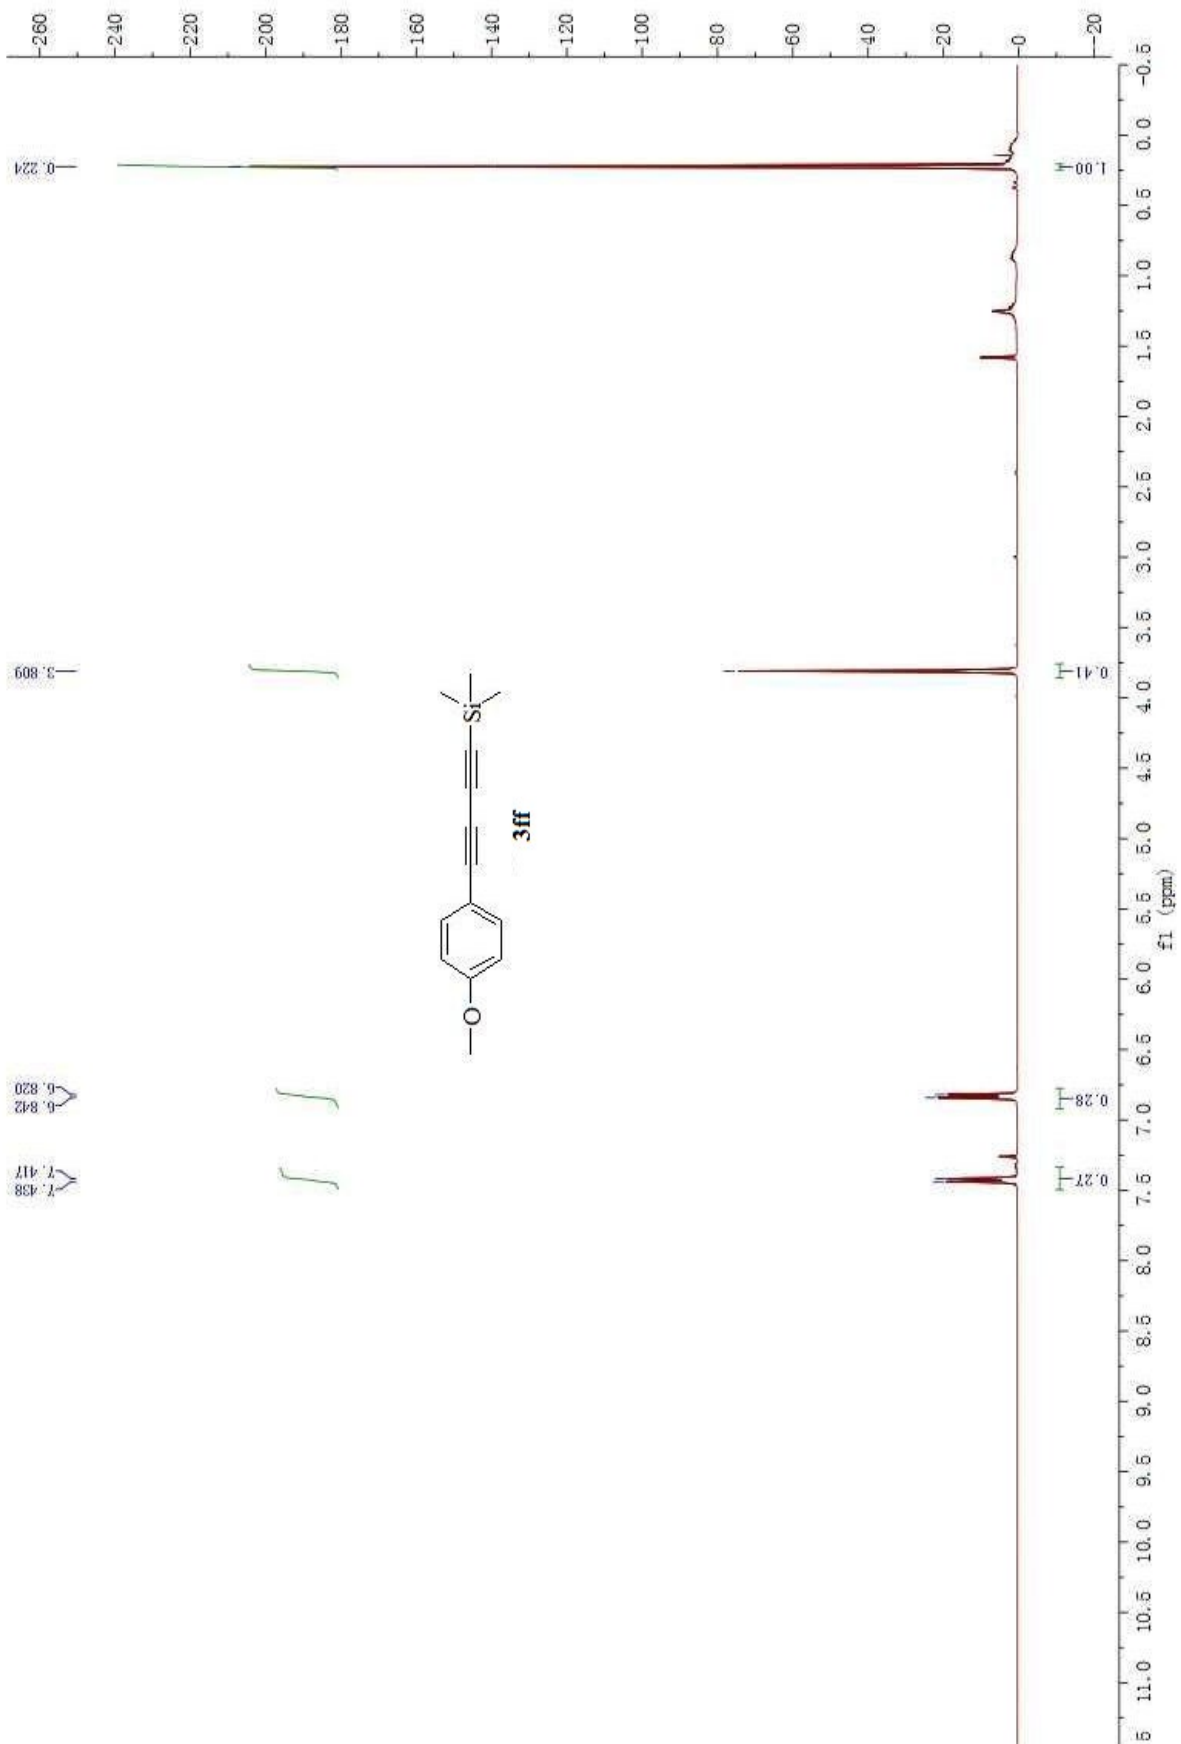

<sup>13</sup>C NMR Spectrum of [4-(4-Methoxy-phenyl)-buta-1,3-diyne]-trimethyl-silane(**3ff**)

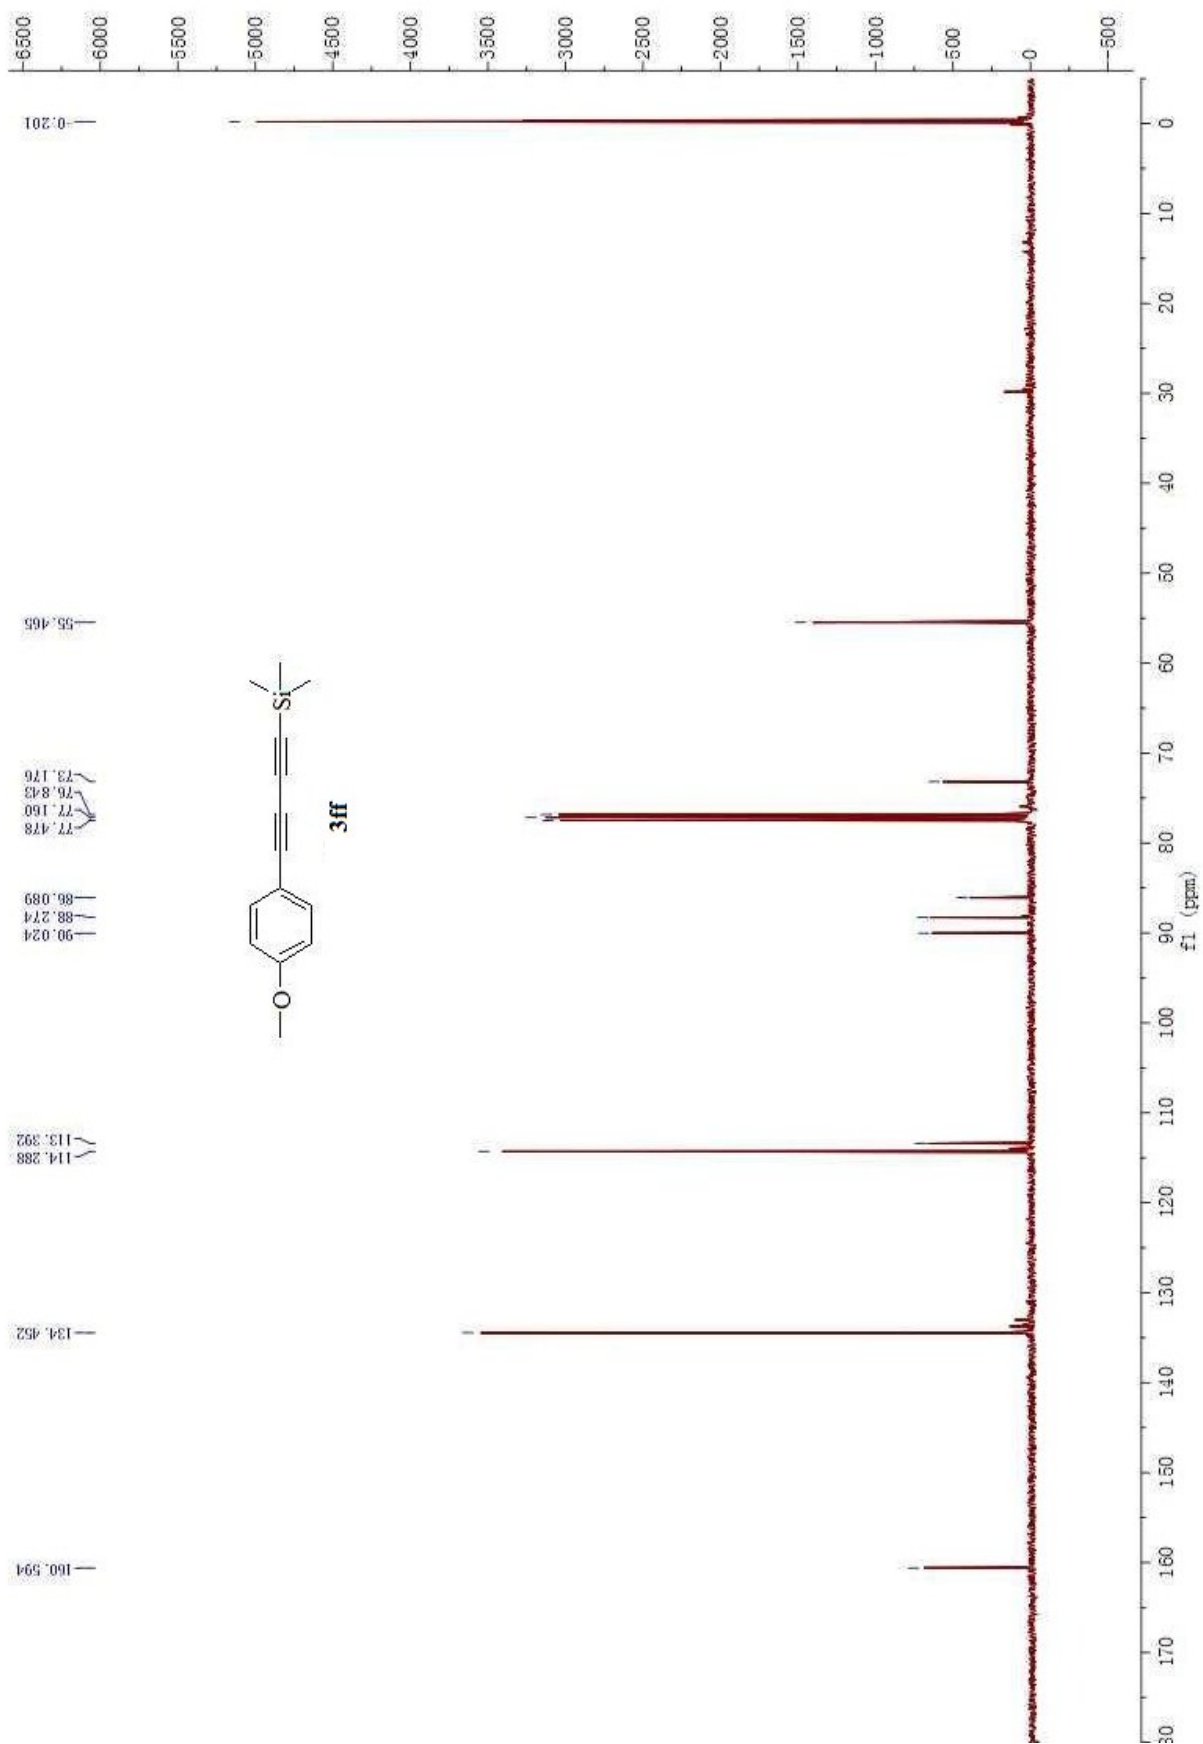

<sup>13</sup>C NMR Spectrum of [4-(4-Fluoro-phenyl)-buta-1,3-diyne]-trimethyl-silane(3fi)

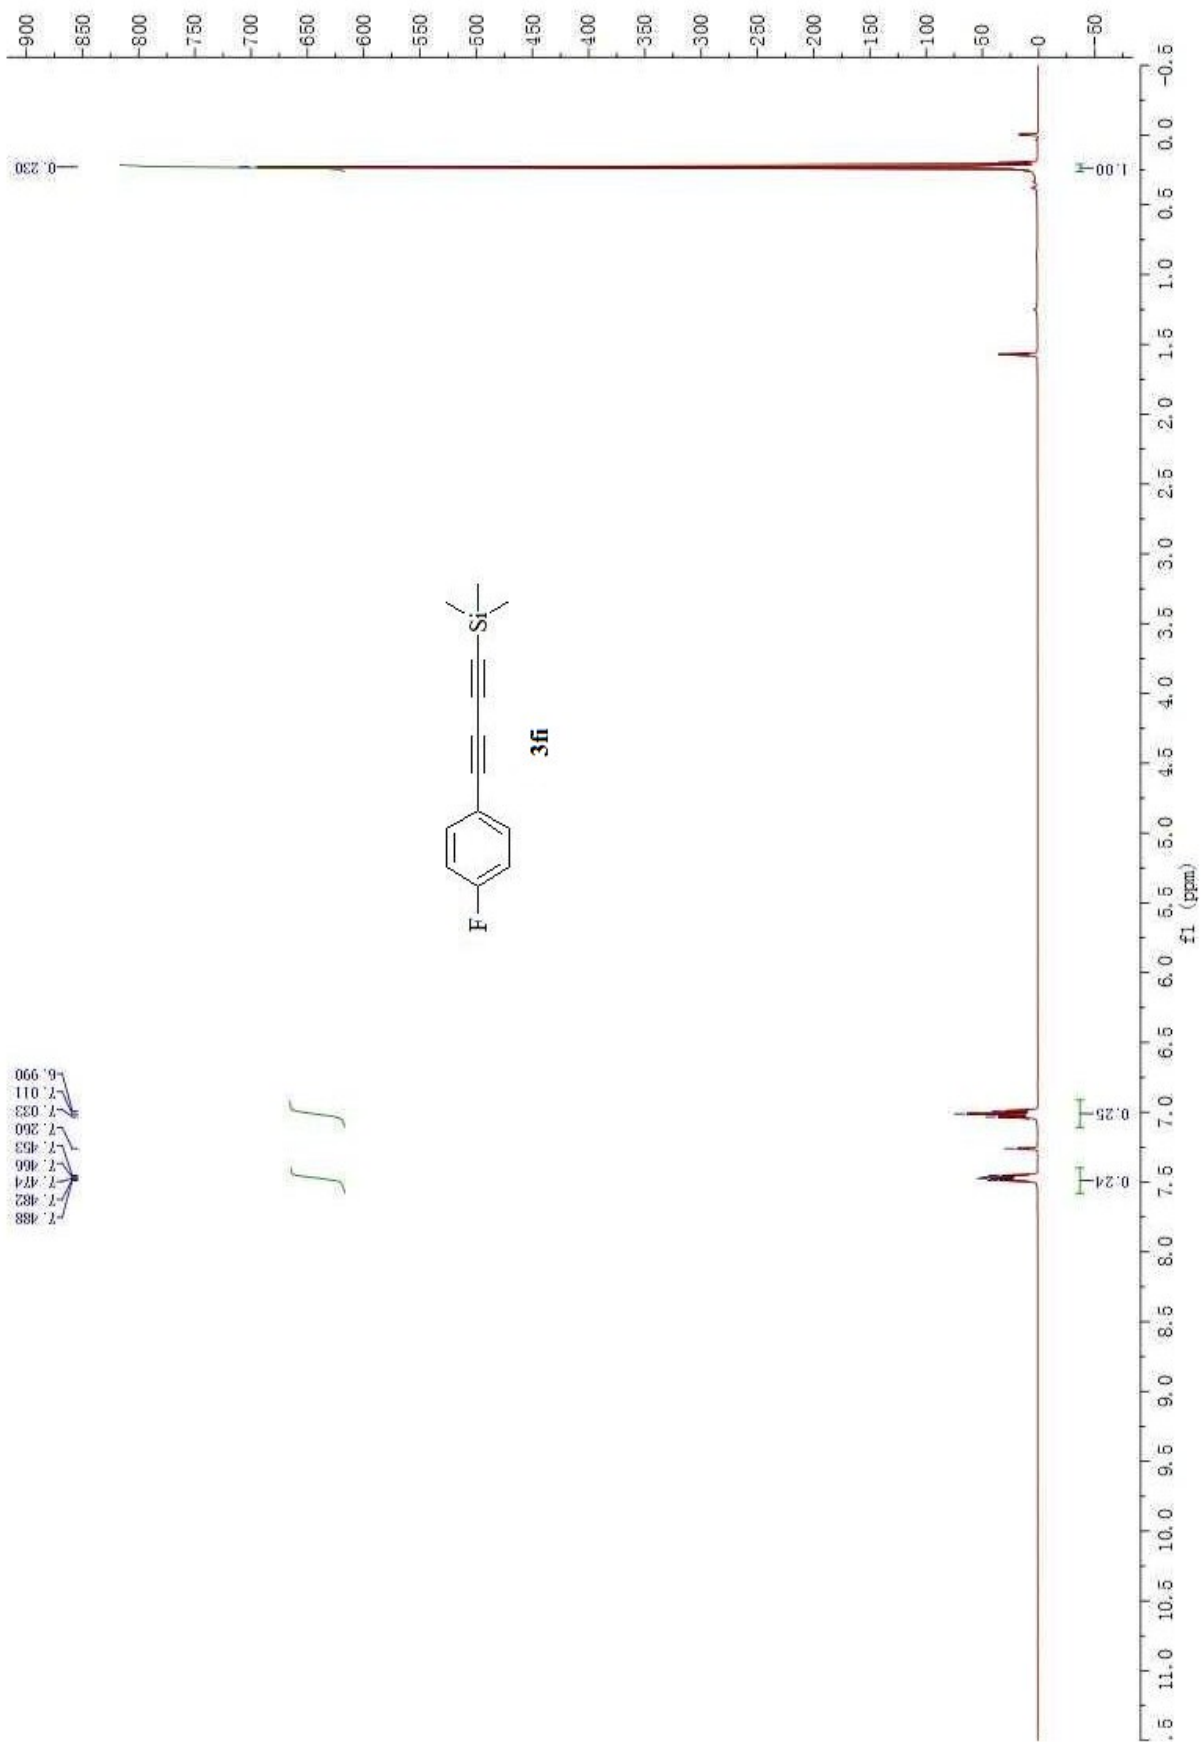

<sup>13</sup>C NMR Spectrum of [4-(4-Fluoro-phenyl)-buta-1,3-diyne]-trimethyl-silane(**3fi**)

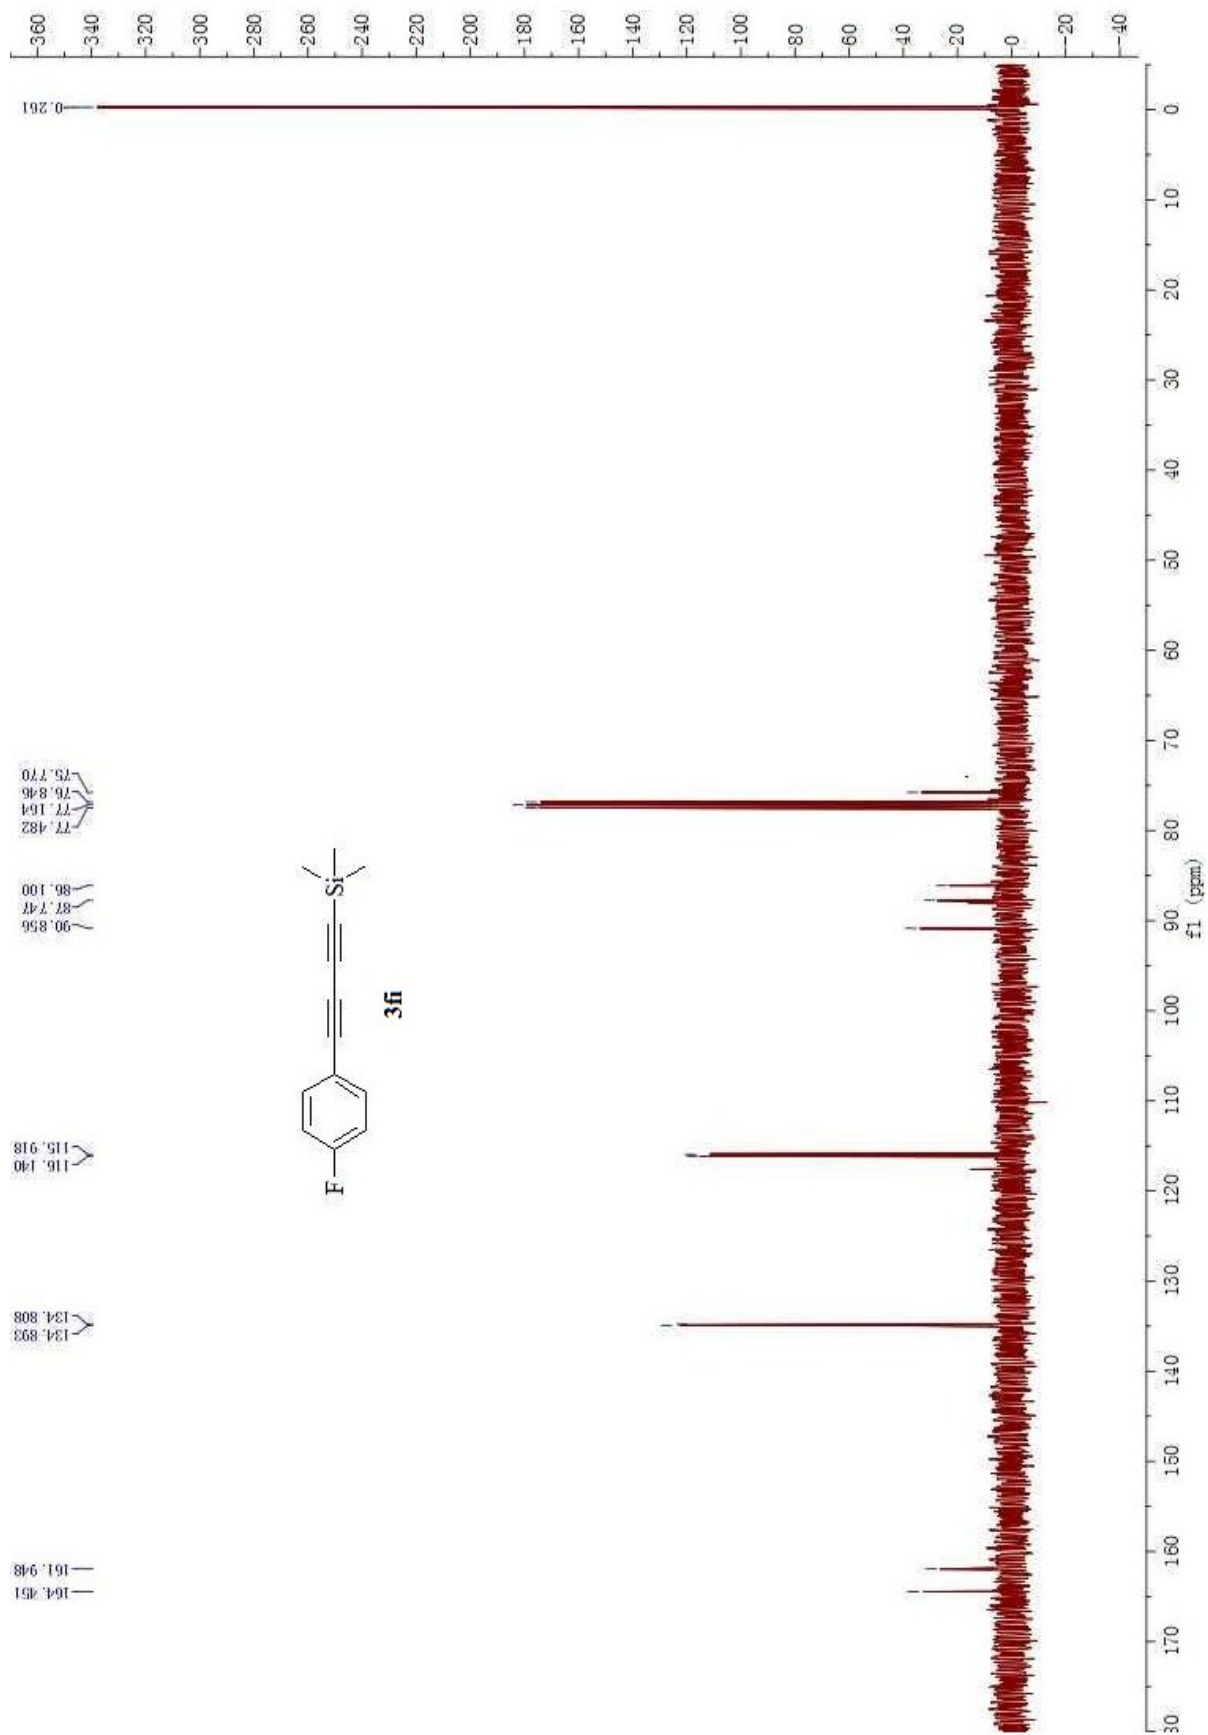

<sup>1</sup>H NMR Spectrum of Trimethyl-[4-(4-trifluoromethyl-phenyl)-buta-1,3-diynyl]-silane(**3fi**)

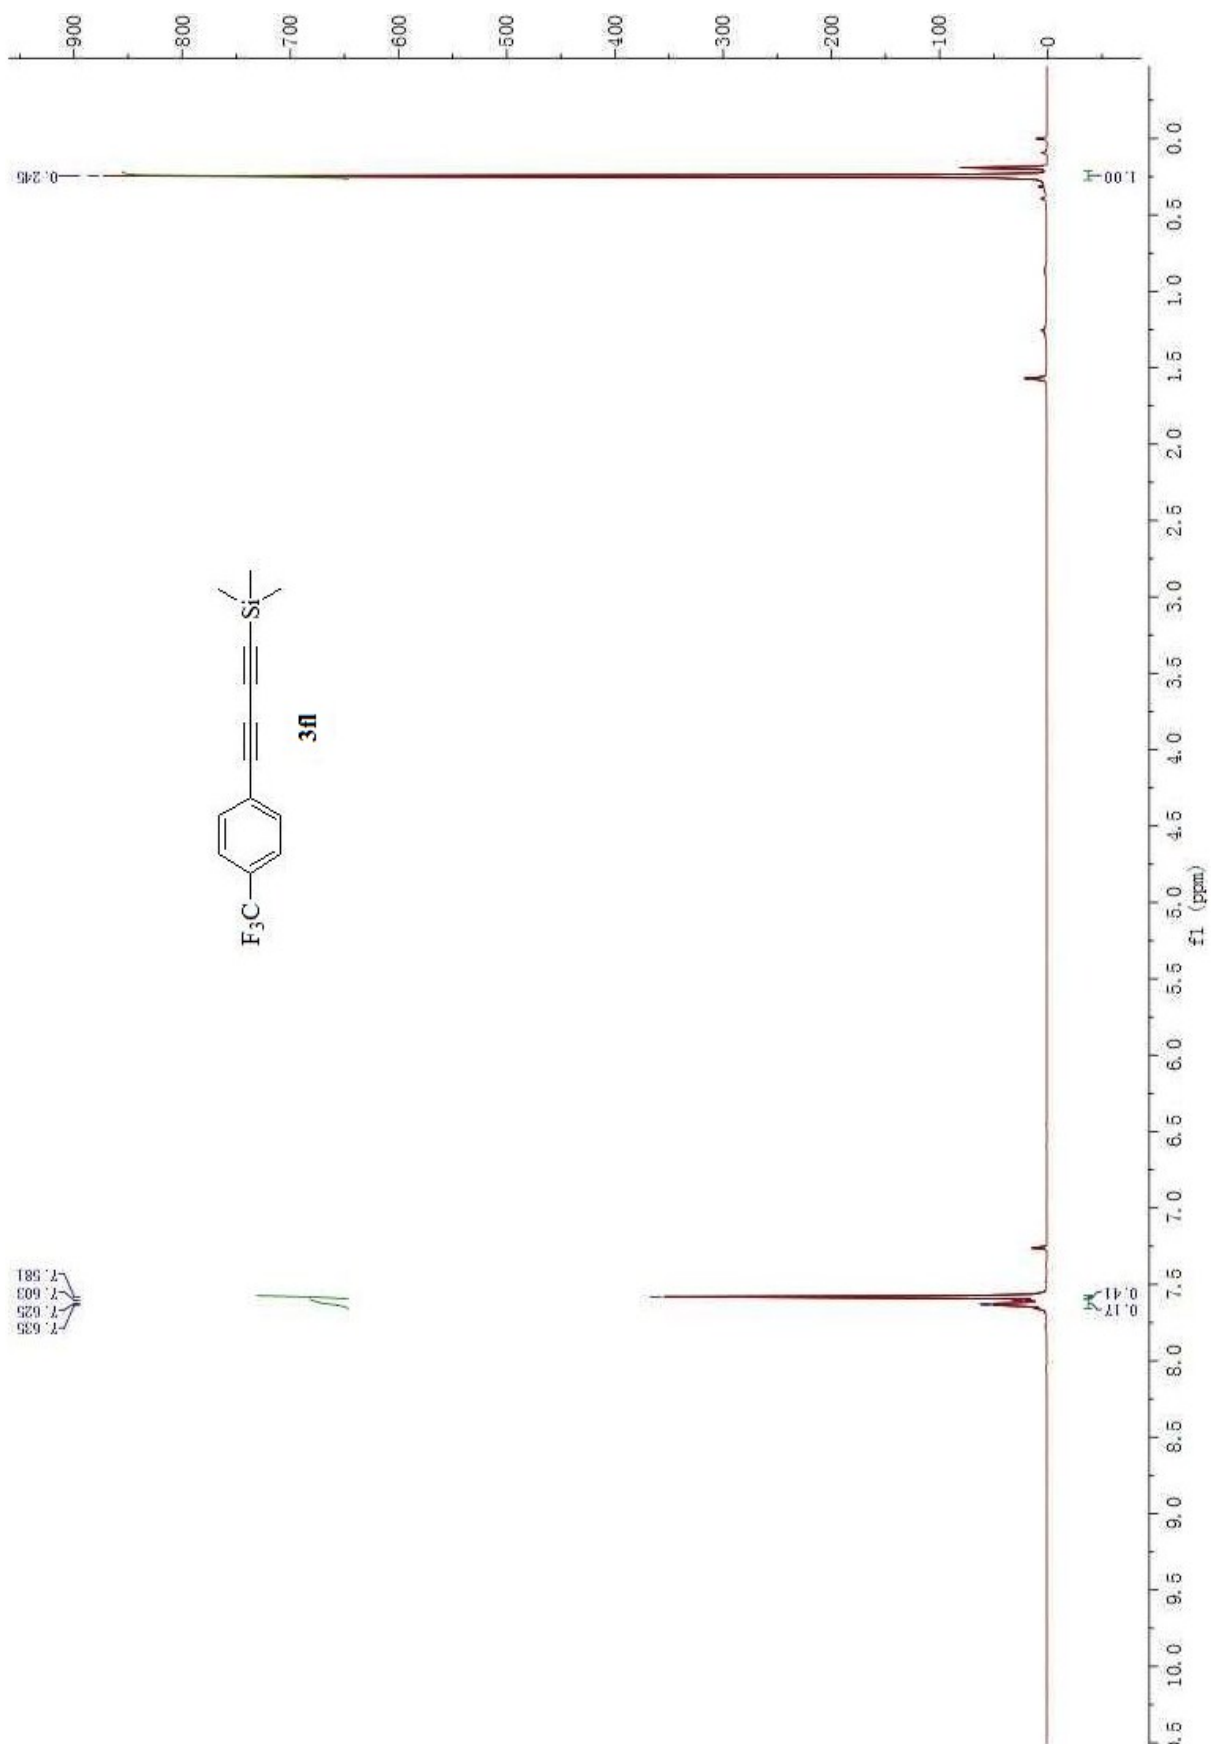

<sup>13</sup>C NMR Spectrum of Trimethyl-[4-(4-trifluoromethyl-phenyl)-buta-1,3-diynyl]-silane(**3fl**)

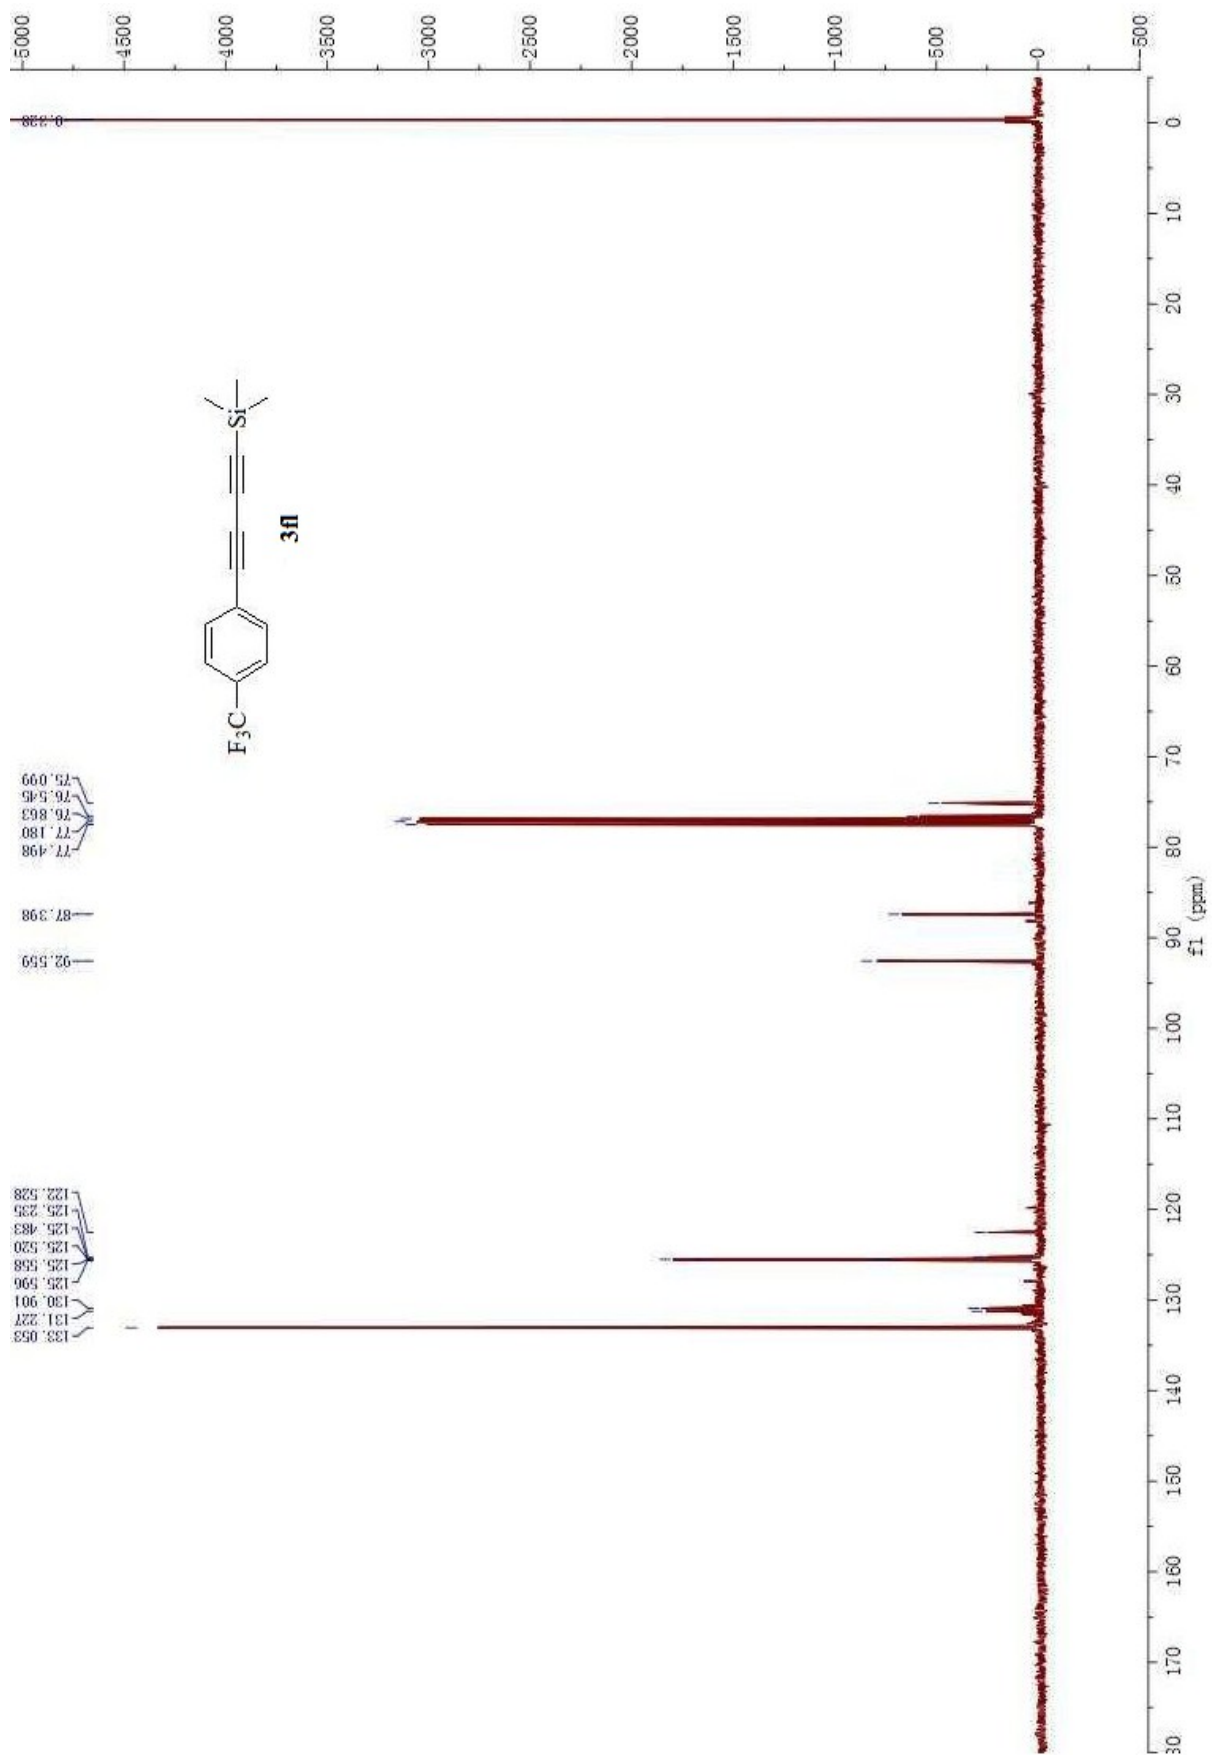

<sup>1</sup>H NMR Spectrum of Trimethyl-(4-naphthalen-2-yl-but-1,3-diyne)-silane(**3fq**)

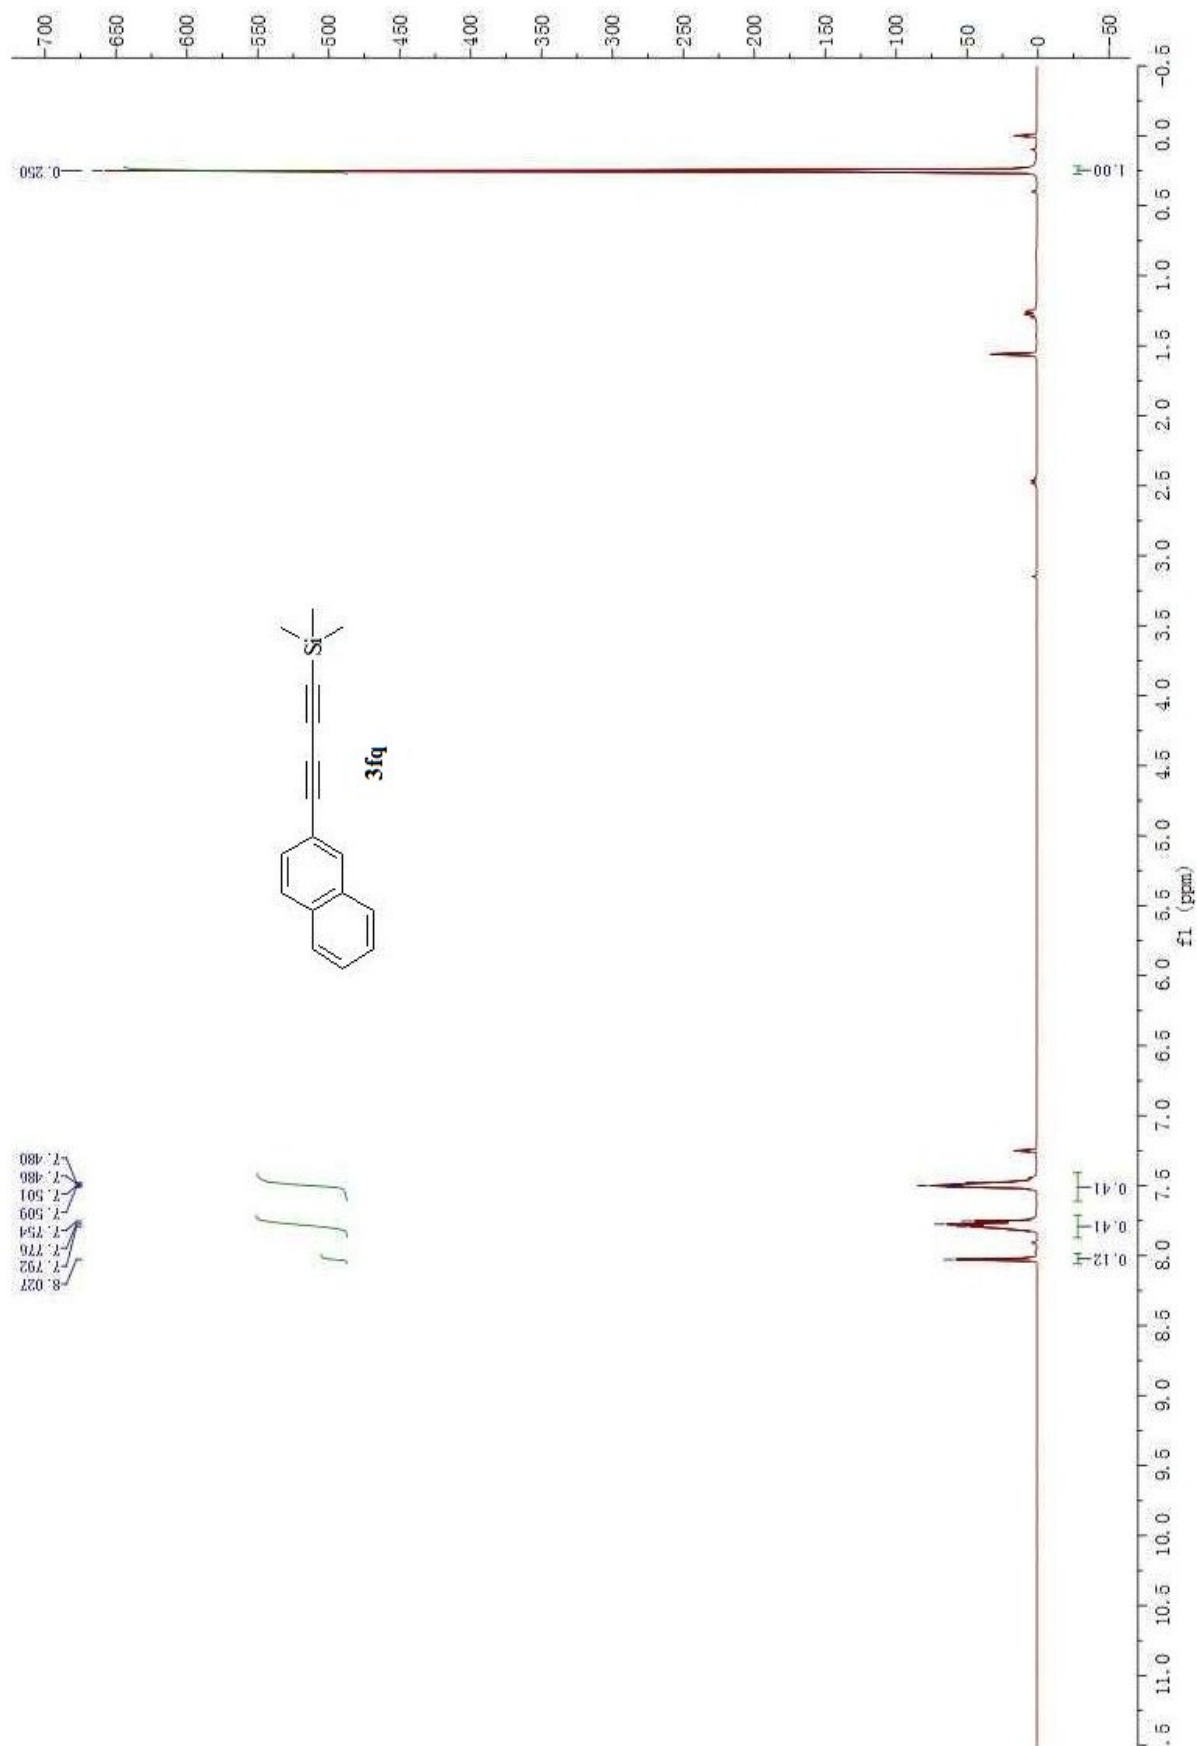

$^{13}\text{C}$  NMR Spectrum of Trimethyl-(4-naphthalen-2-yl-buta-1,3-diynyl)-silane(**3fq**)



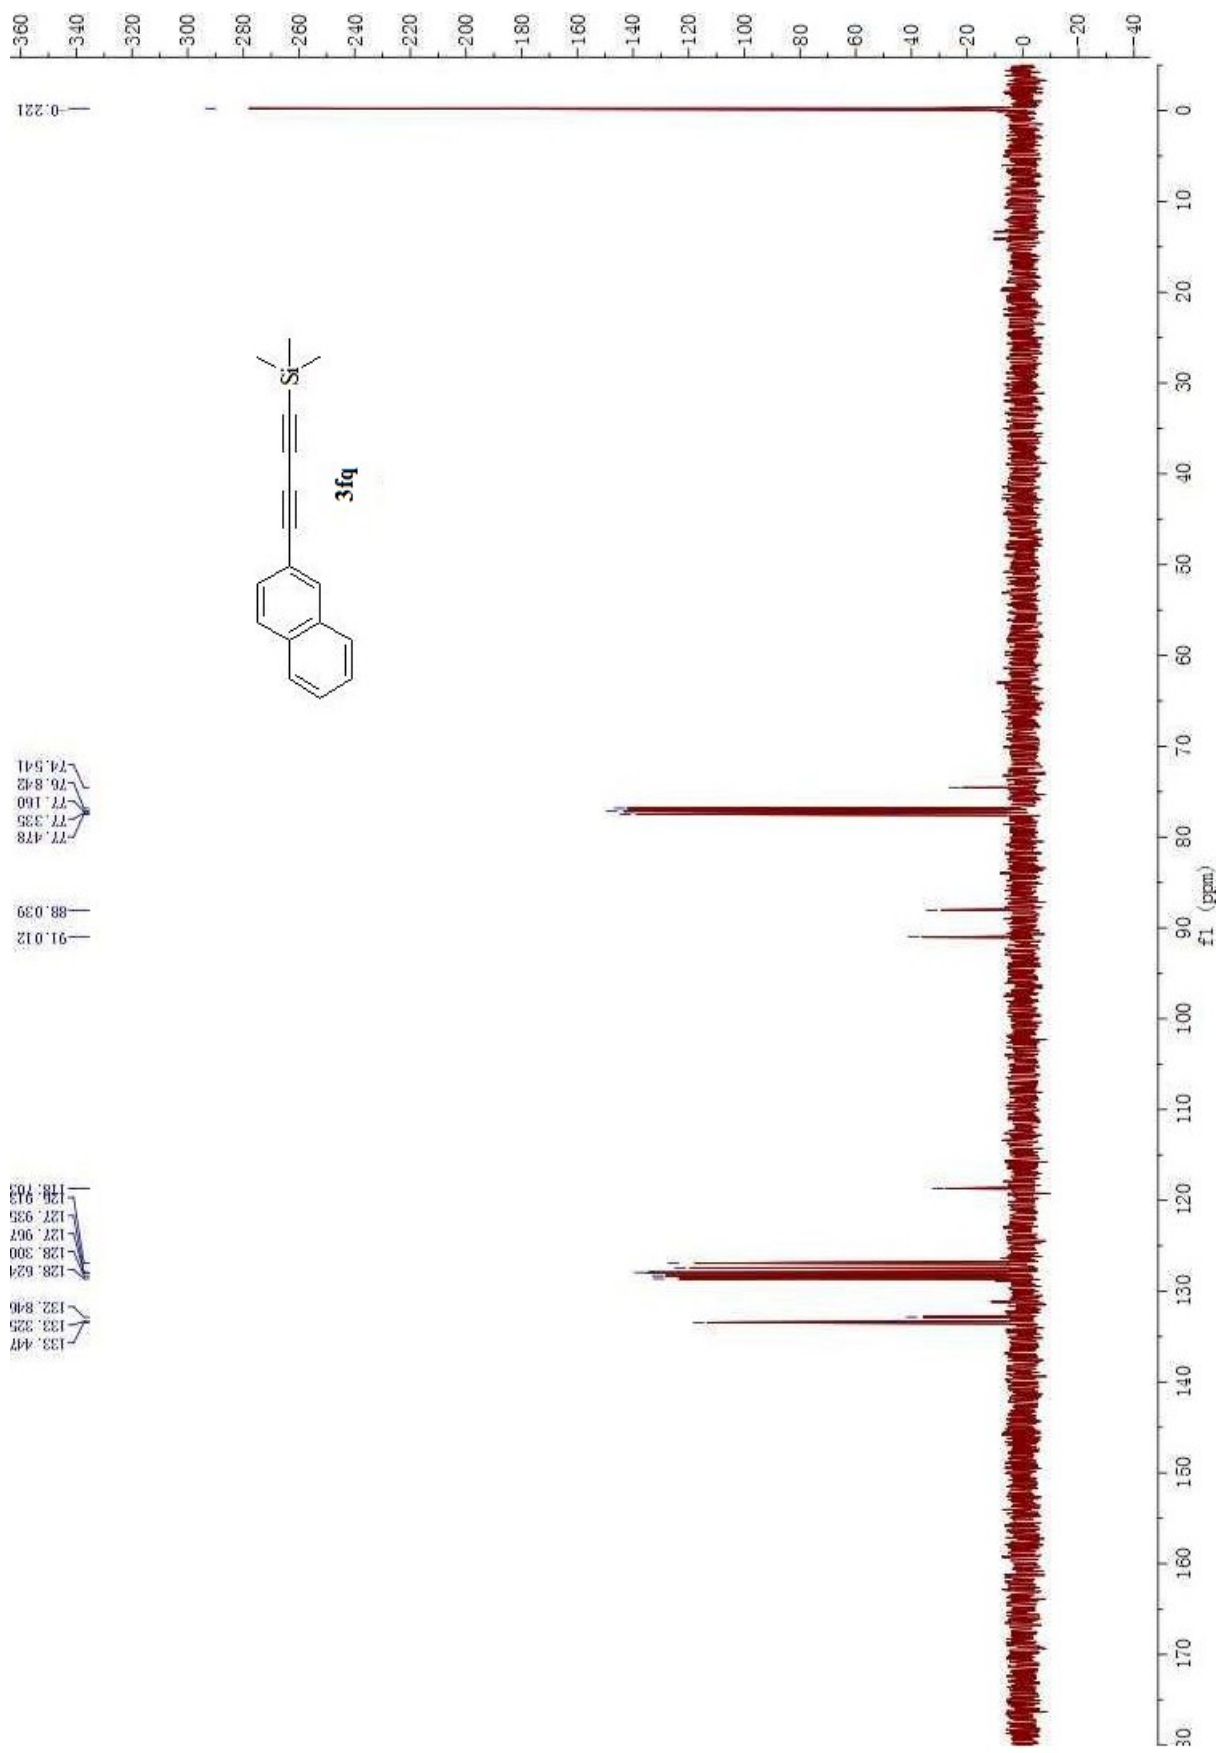

Supplement: c7ra02758c1.pdf [file c7ra02758c1.pdf]
